# Supplementary material for: Proteomic Analysis of Quercetin-Treated K562 Cells
Source: MDPI journal article supplement (doi:10.3390/ijms21010032), 2019-12-19
Supplement: s1 [file s1]

[illegible]

|                                                                                                                                 |         |           |           |      |      |      |         |            |            |              |            |             |              |             |              |             |              |              |             |             |             |             |             |   |
|---------------------------------------------------------------------------------------------------------------------------------|---------|-----------|-----------|------|------|------|---------|------------|------------|--------------|------------|-------------|--------------|-------------|--------------|-------------|--------------|--------------|-------------|-------------|-------------|-------------|-------------|---|
| Tumor protein p54                                                                                                               | TPD52L2 | 116883000 | 17286000  | 1.78 | 1.13 | 0.17 | 19.567  | 0.226136   | 0.144699   | 0.1121807    | 0.1596292  | 0.2239884   | 0.1623984    | 0.1684337   | 0.0793882    | 0.1777266   | 0.07751644   | 1.81675      | 6.77        | 0.159465788 | +           |             |             |   |
| Annexin A1                                                                                                                      | ANXA1   | 257557000 | 36741000  | 1.38 | 1.13 | 0.17 | 9.1498  | 0.2501126  | 0.1428708  | 0.2831206    | 0.2716648  | 0.2659769   | 0.3236607    | 0.2744307   | 0.120352     | NaN         | 0.1139672    | 0.1777653    | 7.73606     | 5.11        | 0.202811559 | +           |             |   |
| Proteasome subunit alpha type-3                                                                                                 | PSMA1   | 21641000  | 35741000  | 1.54 | 1.13 | 0.17 | 6.46005 | 0.2126116  | 0.1436945  | 0.2609907    | 0.215386   | 0.02069169  | 0.453513     | 0.1747899   | 0.137119     | 0.1747899   | 0.137119     | 0.1937087    | 7.49106     | 5.13        | 0.217216693 | +           |             |   |
| Cancer-related nucleotide-triphosphatase                                                                                        | NTF1A   | 41672000  | 64991000  | 1.65 | 1.12 | 0.17 | 9.5818  | 0.2539892  | 0.2402533  | 0.2539892    | 0.2735058  | 0.1723594   | 0.3781787    | 0.3126652   | 0.3272275    | 0.008630365 | 0.729293     | 2.74605      | 4.56        | 0.215393118 | +           |             |             |   |
| Prostaglandin Synthase 2-Prostaglandin H Synthase 2 truncated form                                                              | PTGES2  | 25339000  | 34626000  | 1.46 | 1.12 | 0.17 | 9.9256  | 0.06032421 | -0.1434684 | 0.0658401    | 0.2343786  | 0.4059924   | 0.1935825    | NaN         | NaN          | 0.1582078   | 0.2131124    | 0.1406477    | 1.83642     | 1.74        | 0.147626931 | +           |             |   |
| PM63                                                                                                                            | PM63    | 12564000  | 19575000  | 1.46 | 1.12 | 0.17 | 7.5406  | 0.17425461 | 0.1256293  | 0.03695507   | NaN        | 0.2146022   | 0.186733     | 0.195215    | 0.0544073    | 0.1514692   | -0.008075756 | 0.1004395    | 1.344838    | 3.91603     | 2.41        | 0.125909122 | +           |   |
| Proteasome assembly chaperone 3                                                                                                 | EFB24   | 8903000   | 12789000  | 1.12 | 1.12 | 0.17 | 8.597   | 0.1916889  | 0.1910572  | 0.1593708    | 0.1432628  | 0.1456081   | 0.1195317    | NaN         | 0.1498625    | NaN         | 0.1244027    | 1.76502      | 1.76        | 0.189608802 | +           |             |             |   |
| 14-3-3 protein assembly                                                                                                         | YWHAE   | 138350000 | 207090000 | 1.52 | 1.12 | 0.17 | 9.3068  | 0.0606621  | 0.1463945  | 0.2408638    | 0.292075   | 0.1938348   | 0.270828     | 0.07080147  | 0.01770924   | 0.03026536  | 0.06322686   | 0.24432424   | 4.13604     | 3.38        | 0.137834936 | +           |             |   |
| Aminoacyl tRNA synthase complex-interacting multifunctional protein 2                                                           | ANAP2   | 81344000  | 11680000  | 1.39 | 1.12 | 0.17 | 13.846  | 0.1461491  | 0.169925   | 0.08814155   | 0.09922788 | 0.3004166   | 0.3317052    | 0.3054453   | 0.583338     | 0.06584801  | 0.3154503    | 0.1736392    | 1.43106     | 4.38        | 0.206641091 | +           |             |   |
| Nucleic domain-containing protein 2                                                                                             | NUDCD2  | 39398000  | 5567000   | 1.55 | 1.12 | 0.17 | 11.782  | 0.165944   | 0.1704788  | 0.1610985    | 0.2081427  | 0.195215    | 0.202517     | 0.06267433  | 0.06750099   | 0.568075    | -0.0771712   | 0.1311943    | -0.2519882  | 2.8162      | 1.55        | 0.048492965 | +           |   |
| Mitochondrial import inner membrane translocase subunit TIM44                                                                   | TIM44   | 14787000  | 20757000  | 1.40 | 1.12 | 0.17 | 12.027  | 0.1688987  | 0.2851063  | 0.2632748    | 0.21661    | 0.1198209   | 0.1561377    | 0.3617683   | 0.2970153    | 0.0353423   | 0.04865466   | 0.2429378    | 0.2794119   | 2.23605     | 4.65        | 0.20624823  | +           |   |
| DNA replication licensing factor MCM3                                                                                           | MCM3    | 64712000  | 85797000  | 1.34 | 1.12 | 0.17 | 12.504  | 0.1160985  | 0.1766909  | 0.1453513    | 0.2263395  | 0.1623389   | 0.2549568    | 0.1428708   | 0.04194384   | 0.1314578   | 0.09220742   | 0.09828482   | 0.1463945   | 3.53606     | 5.45        | 0.145433764 | +           |   |
| Translational activator GCN1                                                                                                    | GCN1    | 86944000  | 102010000 | 1.24 | 1.12 | 0.17 | 17.07   | 0.1959996  | 0.1470075  | 0.1208827    | 0.1092306  | 0.186733    | 0.195215     | -0.02492751 | -0.0444073   | 0.04180318  | -0.08873027  | 2.15601      | 0.67        | 0.048493024 | +           |             |             |   |
| Stress-induced phosphoprotein 1                                                                                                 | STP1    | 149830000 | 228550000 | 1.55 | 1.12 | 0.16 | 9.233   | 0.2894004  | 0.1518387  | 0.2220956    | 0.1986199  | 0.3141744   | 0.2026281    | 0.05907837  | 0.36862      | 0.07080147  | 0.0500489    | 5.24604      | 0.68        | 0.138202798 | +           |             |             |   |
| Phenylalanine-tRNA ligase alpha subunit                                                                                         | FARSA   | 21338000  | 28367000  | 1.38 | 1.12 | 0.16 | 10.036  | 0.2284801  | 0.2240403  | 0.03492      | 0.1384213  | 0.06032421  | 0.02147971   | NaN         | 0.3029917    | NaN         | NaN          | 0.3354833    | 0.08270621  | 3.74603     | 2.43        | 0.158763053 | +           |   |
| Charged multivesicular body protein 5                                                                                           | CHMP5   | 1690200   | 2196000   | 1.57 | 1.12 | 0.16 | 11.847  | NaN        | 0.1966235  | 0.1220763    | 0.1296252  | 0.2194628   | 0.1954736    | NaN         | NaN          | -0.2644051  | -0.06680508  | NaN          | 0.06073913  | 1.91501     | 0.72        | 0.091138057 | +           |   |
| Vacuolar protein sorting-associated protein VTA1 homolog                                                                        | VTA1    | 5548100   | 7774800   | 1.47 | 1.12 | 0.16 | 17.242  | 0.1428708  | 0.1709506  | -0.04009629  | 0.2799569  | -0.03491892 | -0.05905342  | 0.2867629   | 0.2189671    | 0.3617683   | 0.4142438    | NaN          | NaN         | 8.56643     | 2.07        | 0.172817185 | +           |   |
| Aldehyde dehydrogenase, mitochondrial                                                                                           | ALDH2   | 3361300   | 4930100   | 1.69 | 1.12 | 0.16 | 21.922  | NaN        | 0.2589409  | NaN          | NaN        | NaN         | 0.4360552    | 0.1853591   | NaN          | NaN         | NaN          | -0.01254818  | 3.3762      | 1.47        | 0.237232126 | +           |             |   |
| Elongator complex protein 1                                                                                                     | IKBAP   | 10162000  | 1236000   | 1.27 | 1.12 | 0.16 | 12.214  | 0.2203299  | 0.24245    | 0.08705513   | 0.1663298  | 0.1867541   | 0.182438     | -0.06759103 | -0.1292447   | NaN         | -0.1134733   | 0.03026536   | -0.04101628 | 1.29501     | 0.89        | 0.06948157  | +           |   |
| ATP synthase subunit beta, mitochondrial                                                                                        | ATP5B   | 62336000  | 87929000  | 1.40 | 1.12 | 0.16 | 4.964   | 0.1541543  | 0.2082676  | 0.1736392    | 0.1598516  | 0.1737659   | 0.0258433    | 0.2924284   | 0.167101     | 0.19673     | -0.136462    | 0.06193259   | 1.84603     | 0.74        | 0.132938386 | +           |             |   |
| High mobility group protein B1                                                                                                  | HMG1    | 6099000   | 9755000   | 1.16 | 1.12 | 0.16 | 18.592  | 0.1353569  | 0.3121889  | 0.1810938    | 0.1475072  | 0.10916     | 0.07160902   | 0.0840429   | 0.09761087   | 0.1599774   | 0.1370075    | 0.2050543    | 0.3436011   | 1.21605     | 4.27        | 0.186520419 | +           |   |
| Trifunctional enzyme subunit beta, mitochondrial-3- ketocyl-CoA thiolase                                                        | HADHB   | 26347000  | 3872000   | 1.49 | 1.12 | 0.16 | 12.693  | 0.3208889  | 0.2033891  | 0.5634511    | 0.2775088  | 0.2075181   | 0.08637615   | 0.1048734   | -0.2832462   | NaN         | NaN          | 0.09922788   | 0.1589833   | 3.04602     | 1.52        | 0.173897047 | +           |   |
| SUMO activating enzyme subunit 2                                                                                                | UBA2    | 11380000  | 15369000  | 1.43 | 1.12 | 0.16 | 15.543  | 0.1461339  | 0.2884477  | 0.1329059    | 0.1835818  | 0.2955153   | 0.1681285    | 0.2167676   | 0.2360947    | 0.1570437   | 0.1548424    | -0.242894    | -0.3008748  | 6.93602     | 1.16        | 0.110319021 | +           |   |
| Erythrocyte membrane dehydratase, decarboxylating                                                                               | PSD2    | 172980000 | 2604000   | 1.44 | 1.12 | 0.16 | 12.473  | 0.2395003  | 0.1470454  | 0.2395006    | 0.1470454  | 0.2395006   | 0.1470454    | 0.2395006   | 0.1470454    | 0.2395006   | 0.1470454    | 0.2395006    | 0.1470454   | 0.2395006   | 1.156403    | 2.84        | 0.101460468 | + |
| Dalrymple phosphogluconate-chaperone protein                                                                                    | DDO2    | 44654000  | 60787000  | 1.40 | 1.12 | 0.16 | 12.636  | 0.340961   | 0.1662012  | 0.2941943    | 0.1629835  | 0.1758121   | 0.1410403    | NaN         | NaN          | NaN         | 0.02384173   | 0.0173002    | 1.15602     | 1.94        | 0.150063067 | +           |             |   |
| Glycosyl transferase 48 kDa subunit                                                                                             | LUC7L   | 1789100   | 1956800   | 1.28 | 1.12 | 0.16 | 19.149  | NaN        | NaN        | NaN          | NaN        | -0.06812029 | 0.0338646    | -0.03732512 | -0.123083    | NaN         | NaN          | 0.3459641    | 0.2065182   | 5.5061      | 0.26        | 0.048310628 | +           |   |
| Up stream element-binding protein 4                                                                                             | KHSAP   | 72068000  | 10378000  | 1.59 | 1.12 | 0.16 | 16.717  | 0.2331518  | 0.1772162  | -0.002714805 | 0.03562387 | -0.02344575 | 0.09166004   | 0.168642    | 0.1597358    | 0.3388294   | 0.3307878    | 0.3831652    | 0.2179751   | 7.45604     | 3.13        | 0.167387931 | +           |   |
| Rae-related protein Rab-12                                                                                                      | RAB18   | 2457900   | 2745100   | 1.18 | 1.12 | 0.16 | 6.213   | 0.2736097  | 0.08038475 | 0.1079657    | 0.197105   | 0.06017591  | 0.110794     | 0.0129994   | 0.0129994    | 0.110794    | 0.0129994    | 0.0480312    | 6.84604     | 3.17        | 0.108723668 | +           |             |   |
| 26S proteasome subunit gamma 7                                                                                                  | PSMC2   | 55344000  | 67144000  | 1.33 | 1.12 | 0.16 | 14.63   | 0.03717139 | 0.1500396  | 0.01235413   | 0.1894135  | 0.1544536   | -0.041046    | 0.1240634   | NaN          | NaN         | 0.02704824   | 0.1223414    | 1.1602      | 1.93        | 0.078204866 | +           |             |   |
| Peroxisomal protein                                                                                                             | PROX2   | 89435000  | 14656000  | 1.61 | 1.11 | 0.16 | 11.958  | 0.1790014  | 0.2717842  | 0.2923105    | 0.3346539  | 0.2880631   | -0.002367994 | 0.03294794  | 0.0321009    | -0.02670465 | 0.08283886   | 0.00460931   | 3.90503     | 2.41        | 0.151642482 | +           |             |   |
| Alpha-soluble NSF attachment protein                                                                                            | NAPA    | 5533500   | 7357600   | 1.38 | 1.11 | 0.16 | 16.978  | 0.1610493  | 0.1301402  | 0.1783641    | 0.1901724  | 0.1719754   | -0.08814742  | NaN         | -0.2475254   | 0.007626157 | 0.03745244   | 0.0551957    | -0.08425727 | 2.9761      | 0.53        | 0.046549597 | +           |   |
| NADH-cytochrome b5 reductase 3; NADH-cytochrome b5 reductase 3 membrane-bound form; NADH-cytochrome b5 reductase 3 soluble form | CYB5R3  | 4292700   | 6265500   | 1.39 | 1.11 | 0.16 | 19.252  | 0.1561377  | 0.1801479  | NaN          | 0.3124238  | 0.1802752   | 0.4368015    | NaN         | -0.008290378 | 0.06460693  | -0.04377975  | -0.007246082 | 1.180294    | 1.66602     | 1.78        | 0.139911524 | +           |   |
| Actin-related protein 3                                                                                                         | ACTR3   | 26384000  | 37902000  | 1.36 | 1.11 | 0.16 | 14.343  | 0.1422174  | 0.1252544  | 0.1307719    | 0.168257   | 0.196733    | 0.09936258   | 0.01976993  | 0.1311943    | NaN         | NaN          | 0.1130337    | 0.06350289  | 1.78604     | 0.73        | 0.115005714 | +           |   |
| Proteasome subunit beta type-6                                                                                                  | PSMB6   | 18755000  | 27455000  | 1.63 | 1.11 | 0.15 | 8.869   | 0.1461251  | 0.1527676  | 0.0924771    | 0.1432628  | 0.1119616   | 0.1515106    | 0.1471764   | 0.1544536    | 0.1020178   | NaN          | 0.08670261   | 0.2740768   | 2.19606     | 5.66        | 0.143097919 | +           |   |
| 26S proteasome non-ATPase regulatory subunit 12                                                                                 | PSMD12  | 36840000  | 54172000  | 1.49 | 1.11 | 0.15 | 11.28   | 0.2017593  | 0.1144005  | 0.1325161    | 0.191836   | 0.2404074   | 0.1724514    | 0.107123    | 0.1184076    | 0.09827728  | 0.0540842    | 3.06003      | 2.51        | 0.151550893 | +           |             |             |   |
| Cleavage and polyadenylation specificity factor subunit 7                                                                       | CPSF7   | 4926000   | 6018500   | 1.49 | 1.11 | 0.15 | 24.534  | -0.1718234 | 0.09855437 | NaN          | -0.1283456 | NaN         | -0.2590084   | NaN         | 0.5727706    | 0.2423281   | 0.242572     | 0.2651968    | 0.3148704   | 1.8761      | 0.73        | 0.125724983 | +           |   |
| Sodium/potassium-transporting ATPase subunit alpha 1                                                                            | ATP1A1  | 35831000  | 44806000  | 1.31 | 1.11 | 0.15 | 14.288  | 0.2210467  | 0.1267086  | 0.2278643    | 0.1978653  | 0.2097652   | -0.1139572   | -0.01762146 | -0.06155102  | -0.0935561  | 0.06397894   | 1.21601      | 0.97        | 0.072358778 | +           |             |             |   |
| 26S proteasome subunit 4                                                                                                        | PSMC1   | 35221000  | 5060000   | 1.47 | 1.11 | 0.15 | 15.936  | 0.1732553  | 0.2462257  | 0.02531228   | 0.3651326  | 0.1593708   | -0.02626508  | 0.1001703   | NaN          | -0.172661   | -0.04046724  | 7.18602      | 1.14        | 0.094747006 | +           |             |             |   |
| Mitochondrial cytochrome c                                                                                                      | MTCS1   | 2592500   | 10731000  | 1.54 | 1.11 | 0.15 | 14.955  | 0.1290852  | 0.102994   | 0.0482838    | 0.244887   | 0.09722405  | 0.0525428    | 0.171764    | 0.2356663    | 0.1545893   | 0.2124124    | 0.1566869    | 0.34603     | 2.46        | 0.14011771  | +           |             |   |
| Cytochrome c1, heme-protein, mitochondrial                                                                                      | CY1     | 9140500   | 1177000   | 1.37 | 1.11 | 0.15 | 12.112  | 0.222681   | 0.1511664  | 0.2899525    | 0.1225071  | 0.1595816   | NaN          | NaN         | 0.0155054    | -0.0312803  | NaN          | 0.2098285    | 1.7301      | 0.76        | 0.091486562 | +           |             |   |
| Collin-1                                                                                                                        | CFI1    | 29160000  | 42543000  | 1.42 | 1.11 | 0.15 | 8.7753  | 0.1368475  | 0.09207205 | 0.08283886   | 0.1918153  | 0.07587489  | 0.2360947    | 0.1678717   | 0.1458731    | 0.1758121   | 0.0938305    | 0.09301919   | 1.41606     | 5.85        | 0.136202386 | +           |             |   |
| Poly(Ph) binding protein 1                                                                                                      | PCBP1   | 13706000  | 19424000  | 1.56 | 1.11 | 0.15 | 17.185  | 0.2883032  | 0.2380991  | 0.2511194    | 0.2000021  | 0.06460693  | 0.09922788   | 0.108491    | 0.1460035    | 0.09193667  | 0.14949149   | 2.26065      | 4.04        | 0.15818849  | +           |             |             |   |
| SH domain-binding glutamic acid-rich-like protein 3                                                                             | SHBGRL3 | 1789200   | 1989200   | 1.40 | 1.11 | 0.15 | 15.122  | NaN        | 0.05602656 | NaN          | NaN        | 0.2808376   | NaN          | -0.126722   | -1.25206     | NaN         | 0.04208399   | NaN          | 7.8601      | 0.42        | -0.25449559 | +           |             |   |
| 14-3-3 protein beta/alpha 14-3-3 protein beta/alpha, N-terminally processed                                                     | YWHAH   | 4637600   | 71164000  | 1.51 | 1.11 | 0.15 | 12.233  | 0.06543438 | 0.1137005  | 0.1646576    | 0.1152996  | 0.1285173   | 0.1681949    |             |              |             |              |              |             |             |             |             |             |   |

|                                                                                                                                                         |                   |           |           |      |      |      |         |             |              |              |             |              |            |              |              |              |              |             |             |             |              |              |
|---------------------------------------------------------------------------------------------------------------------------------------------------------|-------------------|-----------|-----------|------|------|------|---------|-------------|--------------|--------------|-------------|--------------|------------|--------------|--------------|--------------|--------------|-------------|-------------|-------------|--------------|--------------|
| NADH dehydrogenase [ubiquinone] iron-sulfur protein 2, mitochondrial                                                                                    | NDUF22            | 62102000  | 89960000  | 1.32 | 1.09 | 0.12 | 14.45   | NaN         | 0.00129785   | -0.141596    | NaN         | 0.123991     | 0.2159891  | NaN          | NaN          | NaN          | NaN          | 0.5237627   | 0.4439248   | 1.2161      | 0.92         | 0.194624317  |
| Monocarboxylate transporter 1                                                                                                                           | SLC16A1           | 19260000  | 244780000 | 1.19 | 1.09 | 0.12 | 7.7599  | 0.1496496   | 0.2394882    | 0.0533895    | 0.1521185   | 0.4750705    | 0.1578198  | NaN          | 0.6243212    | 0.2553195    | 0.1502997    | NaN         | NaN         | 2.99603     | 2.52         | 0.246802611  |
| Protein FAM49B                                                                                                                                          | FAM49B            | 89627000  | 13743000  | 1.46 | 1.09 | 0.12 | 10.5166 | 0.1496496   | 0.2280466    | 0.2293578    | 0.2311866   | 0.2228064    | 0.2276622  | 0.01449814   | 0.1533993    | 0.0649239    | 0.1427414    | 0.000721115 | 0.06391706  | 1.2864      | 3.89         | 0.164893208  |
| Peptidyl-prolyl cis-trans isomerase FKBP5;Peptidyl-prolyl cis-trans isomerase FKBP5, N-terminally processed                                             | FKBP5             | 214480000 | 279600000 | 1.30 | 1.09 | 0.12 | 17.591  | 0.02375215  | 0.1035311    | 0.1021878    | 0.06391706  | 0.06295063   | 0.1304037  | NaN          | 0.3111453    | -0.007942225 | NaN          | NaN         | 2.3562      | 1.63        | 0.098744328  |              |
| Ubiquitin-conjugating enzyme E2 K                                                                                                                       | UBE2K             | 19481000  | 292710000 | 1.44 | 1.09 | 0.12 | 12.942  | -0.06231318 | -0.1196671   | 0.1963552    | 0.03699012  | 0.1407786    | 0.02866064 | 0.1731275    | 0.08596661   | 0.3119618    | 0.286408     | 0.007482317 | 0.3426685   | 2.5276      | 1.60         | 0.114790357  |
| 26S proteasome regulatory subunit 6B                                                                                                                    | PSMC4             | 20432000  | 290070000 | 1.42 | 1.09 | 0.12 | 17.283  | 0.1175621   | 0.1310627    | 0.1842168    | 0.09234277  | 0.141302     | 0.1587248  | NaN          | NaN          | NaN          | NaN          | 0.1870075   | 0.2892443   | 1.2464      | 3.91         | 0.136268264  |
| 5-formylglutamate hydrolase                                                                                                                             | ISD               | 17273000  | 261140000 | 1.48 | 1.09 | 0.12 | 9.5767  | 0.120352    | -0.005782364 | 0.1430015    | -0.09703889 | 0.2071432    | 0.01035019 | -0.006129998 | 0.07231157   | 0.1992483    | 0.1107641    | 0.1003049   | 0.1149001   | 1.0162      | 2.00         | 0.080785388  |
| Ras-related protein Rab-10                                                                                                                              | RAB10             | 73459000  | 116610000 | 1.47 | 1.09 | 0.12 | 15.399  | 0.09801521  | 0.2008809    | 0.1182302    | 0.1945914   | 0.1445685    | 0.2952528  | 0.1759396    | 0.01543256   | 0.1934563    | 0.1317005    | 0.1719754   | 0.0414813   | 5.89605     | 4.23         | 0.146285258  |
| Transketolase                                                                                                                                           | TKT               | 210480000 | 275270000 | 1.40 | 1.09 | 0.12 | 6.4679  | 0.06095126  | 0.0930119    | 0.0930119    | 0.0930119   | 0.1047392    | 0.02901669 | 0.1783641    | 0.2248801    | 0.1103117    | 0.10916      | 0.0916      | 0.0916      | 6.97606     | 5.16         | 0.12343534   |
| Proteasome activator subunit type-3                                                                                                                     | PA2A3             | 44251000  | 64099000  | 1.59 | 1.09 | 0.12 | 11.447  | 0.1609005   | 0.1510312    | 0.1510312    | 0.1510312   | 0.1510312    | 0.1510312  | 0.1510312    | 0.1510312    | 0.1510312    | 0.1510312    | 0.1510312   | 0.1510312   | 0.1510312   | 0.1510312    | 0.1510312    |
| DNA replication complex GINS protein PSF1                                                                                                               | GINS1             | 9025100   | 10339000  | 1.65 | 1.09 | 0.12 | 13.6885 | NaN         | 0.1280294    | -0.004325207 | 0.03506084  | 0.02444594   | NaN        | NaN          | NaN          | NaN          | NaN          | 0.2654369   | -0.104899   | 3.1361      | 0.50         | 0.85777031   |
| Ras-related protein Rab-1B;Putative Ras-related protein Rab-1C                                                                                          | RAB1B,RAB1C       | 55094000  | 80940000  | 1.47 | 1.09 | 0.12 | 18.009  | 0.1187585   | 0.1158324    | 0.1265764    | 0.1882743   | 0.1763228    | 0.2152437  | 0.05130255   | 0.004177767  | 0.05102402   | 0.04404436   | 0.04879416  | 1.0563      | 2.98        | 0.094017513  |              |
| 18-18 alpha glucose-regulated protein                                                                                                                   | HSP45             | 386920000 | 502740000 | 1.35 | 1.09 | 0.12 | 11.433  | 0.0536674   | 0.04376442   | 0.03745344   | 0.03885755  | 0.02616103   | 0.01613266 | 0.2778897    | 0.1296127    | 0.1934362    | 0.1981169    | 0.2570107   | 0.316603    | 2.50        | 1.116474907  |              |
| Cytochrome b-c1 complex subunit Rieske, mitochondrial;Cytochrome b-c1 complex subunit 11;Putative cytochrome b-c1 complex subunit Rieske-like protein 1 | UCRCFSL1,UCRCFSP1 | 27269000  | 111330000 | 1.50 | 1.09 | 0.12 | 7.7333  | 0.05380643  | 0.1155566    | 0.13102238   | 0.1774015   | -0.2319929   | -0.1355663 | 0.03368919   | 0.03438562   | 0.02219017   | -0.1546826   | 0.90502     | 1.04        | 0.096431353 |              |              |
| Acetate hydratase, mitochondrial                                                                                                                        | AC02              | 47713000  | 652460000 | 1.42 | 1.09 | 0.12 | 18.363  | 0.203765    | 0.1540647    | 0.2358919    | 0.205017    | 0.13711      | 0.1984949  | -0.06136038  | -0.09051781  | -0.01661451  | -0.12636     | -0.03393872 | 0.08610431  | 7.7662      | 1.11         | 0.07358512   |
| Ezrin                                                                                                                                                   | EZR               | 52642000  | 750580000 | 1.39 | 1.09 | 0.12 | 13.258  | 0.2595437   | 0.245906     | 0.245906     | 0.2515676   | 0.4059942    | 0.2917214  | -0.09400225  | -0.0571755   | -0.001934667 | 0.01973711   | -0.05716651 | -0.02997102 | 3.0062      | 1.04         | 0.193519714  |
| Oxygen-dependent coproporphyrinogen-III oxidase, mitochondrial                                                                                          | CPOX              | 2865300   | 4206200   | 1.26 | 1.08 | 0.12 | 13.643  | 0.01635366  | -0.181459    | 0.2239167    | NaN         | 0.06460693   | 0.07778991 | 0.2865263    | NaN          | 0.2284801    | 0.2464689    | 0.2313095   | 0.2601461   | 1.3262      | 1.88         | 0.14515233   |
| Aminocyclitol RNA synthase complex-interacting multifunctional protein 1;Endothelial molecule-activating polypeptide 2                                  | AIMP1             | 46091000  | 61342000  | 1.35 | 1.08 | 0.11 | 15.161  | 0.201132    | NaN          | 0.1797856    | 0.1428708   | 0.108491     | 0.2459823  | -0.02598469  | -0.2235085   | -0.1616371   | -0.395549    | NaN         | -0.112727   | 9.5361      | 0.02         | -0.004070946 |
| Sorting nexin 5                                                                                                                                         | SNX5              | 52481000  | 67351000  | 1.24 | 1.08 | 0.11 | 23.242  | 0.09990108  | 0.1195554    | 0.1138339    | 0.05380643  | -0.180881    | 0.284751   | NaN          | NaN          | NaN          | NaN          | 0.009777201 | 0.09294018  | 2.2261      | 0.65         | 0.060075212  |
| Ubiquitin-binding protein RBBP4                                                                                                                         | RBBP4             | 51655000  | 620840000 | 1.41 | 1.08 | 0.11 | 15.033  | 0.1485955   | 0.491292     | 0.2734413    | 0.2515115   | 0.05144163   | 0.1716905  | 0.0743837    | 0.1474811    | 0.2344615    | 0.08005652   | 0.0244615   | 0.8364      | 1.05        | 0.11386423   |              |
| Vesicle-associated membrane protein 2                                                                                                                   | VAMP2             | 25368000  | 3250500   | 1.34 | 1.08 | 0.11 | 28.803  | -0.0588822  | 0.0588822    | 0.1519886    | 0.3418057   | -0.279875    | -0.2860312 | -0.1485448   | -0.05896888  | NaN          | NaN          | NaN         | NaN         | 2.3051      | 0.64         | 0.12629414   |
| Protein transport protein Sec24C                                                                                                                        | SEC24C            | 31375000  | 38985000  | 1.28 | 1.08 | 0.11 | 6.6259  | 0.08243007  | 0.1478277    | 0.07491644   | 0.08878382  | 0.0878702    | 0.08147596 | 0.1800205    | 0.1527676    | 0.0745054    | -0.08974321  | 0.1774714   | 6.1364      | 0.21        | 0.097368796  |              |
| ATP synthase subunit 1, mitochondrial                                                                                                                   | ATP5J             | 51984000  | 95726000  | 1.55 | 1.08 | 0.11 | 12.692  | 0.0278618   | 0.04610153   | 0.2063932    | 0.1562672   | 0.1304037    | 0.2602466  | 0.0640551    | 0.1159287    | 0.04907312   | -0.00942267  | 2.1563      | 2.67        | 0.102369192 |              |              |
| Ras-related protein Rab-2A                                                                                                                              | RAB2A             | 19426000  | 27860000  | 1.48 | 1.08 | 0.11 | 5.1607  | 0.06841251  | 0.09788039   | 0.02913487   | 0.1323689   | 0.184213     | 0.1265764  | 0.1381051    | 0.06431112   | 0.05797008   | 0.02361021   | 0.00389986  | -0.00807294 | 6.1064      | 3.20         | 0.071811847  |
| NADH dehydrogenase [ubiquinone] iron-sulfur protein 8, mitochondrial                                                                                    | NDUF5B            | 8041200   | 1261000   | 1.54 | 1.08 | 0.11 | 9.583   | 0.07601179  | 0.1096549    | NaN          | NaN         | NaN          | NaN        | 0.6315809    | 0.02119536   | 0.4436067    | NaN          | NaN         | 9.8802      | 1.01        | 0.257261893  |              |
| Ras-related protein Rab-1A                                                                                                                              | RAB1A             | 4791500   | 7364200   | 1.51 | 1.08 | 0.11 | 8.5658  | 0.1949947   | 0.1624679    | 0.1043367    | 0.2584909   | 0.2108876    | 0.1844707  | 0.1082234    | 0.2584586    | 0.2508404    | -0.01384391  | -0.06837742 | -0.1155662  | 5.6063      | 2.25         | 0.128361533  |
| Ras-related protein Rab-2b                                                                                                                              | RAP2B             | 5792000   | 8818600   | 1.47 | 1.08 | 0.11 | 12.864  | 0.222681    | 0.2021356    | 0.1425869    | 0.100574    | NaN          | 0.2337653  | 0.05311317   | 0.3554674    | NaN          | NaN          | NaN         | 3.6063      | 2.48        | 0.277045944  |              |
| Epidermal transglutination elongation factor 1, epsilon-1                                                                                               | EEF1E1            | 12479000  | 17435000  | 1.48 | 1.08 | 0.11 | 6.17338 | 0.167358    | 0.2052574    | 0.07477944   | 0.350663    | 0.243096     | 0.08005939 | NaN          | 0.0030978    | 0.02783677   | 0.04045095   | 0.04845093  | 9.21402     | 1.04        | 0.074644147  |              |
| Apoptosis regulator BAX                                                                                                                                 | BAX               | 2607500   | 38574000  | 1.55 | 1.08 | 0.11 | 16.754  | 0.1292171   | 0.1008431    | 0.2258919    | 0.0745054   | 0.09774555   | 0.1035311  | NaN          | -0.1633467   | -0.1488646   | -0.2800368   | -0.34966597 | -0.551669   | 5.5601      | 0.25         | -0.041804526 |
| 2-oxoglutarate dehydrogenase, mitochondrial                                                                                                             | OGDH              | 2402400   | 2850700   | 1.31 | 1.08 | 0.11 | 15.218  | 0.08501676  | 0.08093054   | 0.0534243    | 0.2023863   | 0.1463945    | 0.32008    | NaN          | NaN          | NaN          | 0.05547326   | 0.03928072  | 1.6062      | 1.80        | 0.099542865  |              |
| Calcium-binding mitochondrial carrier protein Aralar2                                                                                                   | SLC25A13          | 22372000  | 29958000  | 1.31 | 1.08 | 0.11 | 14.549  | 0.08079411  | 0.1080895    | 0.2036397    | 0.1590955   | -0.0842879   | 0.01292609 | 0.4692609    | 0.5260689    | 0.1068843    | 0.2213203    | -0.106234   | 2.6062      | 1.59        | 0.17596123   |              |
| FACT complex subunit SSM1                                                                                                                               | SSM1              | 5551000   | 6238000   | 1.26 | 1.08 | 0.11 | 13.767  | 0.137091    | NaN          | 0.151176     | -0.4529055  | -0.148789    | -0.212183  | 0.0566055    | -0.318909    | -0.266037    | NaN          | 0.1062144   | 1.1361      | 0.95        | -0.182424834 |              |
| Delta-5 pyroline-5-carboxylate synthase;Glutamate-5-ketide;Gamma-glutamyl phosphate reductase                                                           | ALDH1B1           | 21478000  | 25342000  | 1.27 | 1.08 | 0.11 | 14.381  | -0.0969495  | 0.07696952   | 0.07942928   | 0.1137324   | 0.01178193   | 0.1820367  | 0.03342511   | -0.100747    | -0.1820367   | -0.2780063   | -0.1604112  | 5.74601     | 0.24        | -0.02526479  |              |
| Translational-associated protein subunit delta                                                                                                          | SR8               | 9250000   | 11527000  | 1.51 | 1.08 | 0.11 | 7.2091  | 0.103397    | 0.05018827   | 0.2526579    | 0.279837    | 0.144699     | 0.19131    | 0.2803624    | 0.1210154    | 0.04837578   | 0.08161233   | 0.1393385   | 2.4664      | 3.61        | 0.143905166  |              |
| Actin-related protein 2/3 complex subunit 3                                                                                                             | ARPC3             | 3689800   | 52112000  | 1.48 | 1.08 | 0.11 | 14.27   | 0.2866446   | -0.03821367  | 0.0934444    | 0.06391706  | 0.1067503    | 0.01473279 | 0.21661      | 0.1103632    | 0.1544536    | NaN          | NaN         | 1.2862      | 1.89        | 0.101912086  |              |
| Protein phosphatase 2A regulatory subunit A1                                                                                                            | PPP2R1A           | 27867000  | 37708000  | 1.43 | 1.08 | 0.11 | 10.009  | 0.0775123   | 0.09788039   | 0.07681272   | 0.0602134   | 0.1442209    | 0.1169883  | 0.0793271    | 0.09763087   | 0.1356273    | 0.1356273    | 0.1356273   | 0.1356273   | 4.3509      | 8.36         | 0.038936772  |
| Hypoxia up-regulated protein 1                                                                                                                          | HUP1              | 12635000  | 158450000 | 1.24 | 1.08 | 0.11 | 19.477  | 0.0945038   | 0.104605     | 0.1460035    | 0.1182268   | 0.08936255   | 0.0699771  | 0.09369545   | 0.05921867   | 0.06322686   | 0.0766959    | 0.0746223   | 2.3467      | 6.63        | 0.09481761   |              |
| Protein disulfide-isomerase                                                                                                                             | P4HB              | 19141000  | 260790000 | 1.37 | 1.08 | 0.11 | 9.1691  | 0.101878    | 0.05838585   | 0.1343282    | 0.08266635  | 0.08868441   | 0.09724875 | 0.2260152    | 0.1532782    | NaN          | -0.009646045 | 0.003602319 | 2.1263      | 2.67        | 0.09212566   |              |
| Calreticulin                                                                                                                                            | CALR              | 12809000  | 192700000 | 1.45 | 1.08 | 0.11 | 15.811  | 0.2085916   | 0.2083924    | 0.09504669   | 0.1102295   | 0.1764505    | 0.1547128  | 0.06073913   | 0.08963377   | NaN          | NaN          | NaN         | 0.05533457  | 6.0705      | 4.22         | 0.136307518  |
| Proteasome subunit beta type-4                                                                                                                          | PSMB4             | 20985000  | 31295000  | 1.56 | 1.08 | 0.10 | 5.9052  | 0.193389    | 0.1453513    | 0.1712009    | 0.1348781   | 0.112223     | 0.0511194  | 0.02899346   | 0.04828168   | -0.03592321  | 0.0182088    | 0.1894942   | 0.01278525  | 1.9563      | 2.71         | 0.144446821  |
| Protein phosphatase non-ATPase regulatory subunit 6B                                                                                                    | PSMB6             | 67763000  | 73698000  | 1.38 | 1.07 | 0.10 | 14.354  | 0.1276179   | 0.1463884    | 0.03877663   | 0.07560106  | 0.1174251    | 0.2528162  | -0.1240022   | 0.2528162    | 0.1398824    | 0.1398824    | 0.1398824   | 0.1398824   | 6.0601      | 0.22         | 0.030461681  |
| StratA transducer and activator of transcription 3                                                                                                      | STAG3             | 7248500   | 11378000  | 1.35 | 1.07 | 0.10 | 10.1502 | 0.1094274   | 0.2737398    | 0.04278438   | 0.3517414   | 0.03280615   | 0.1102295  | -0.1848673   | -0.6849034   | NaN          | NaN          | NaN         | NaN         | 5.7761      | 0.24         | -0.075406174 |
| Cdk-like protein                                                                                                                                        | CKL1              | 81573000  | 10503000  | 1.34 | 1.07 | 0.10 | 8.806   | 0.06018582  | -0.06345443  | 0.0456085    | 0.03506084  | 0.007289554  | 0.0949159  | -0.0168787   | -0.007289554 | 0.0541634    | 0.4531224    | 0.2702299   | 5.4962      | 1.76        | 0.07560168   |              |
| Peptidyl-prolyl cis-trans isomerase F, mitochondrial                                                                                                    | PFKFB             | 9399700   | 13971000  | 1.35 | 1.07 | 0.10 | 12.272  | 0.09125975  | 0.1701815    | 0.08610431   | NaN         | -0.067608591 | 0.07519039 |              |              |              |              |             |             |             |              |              |

|                                                                                                     |             |           |           |      |      |      |         |             |              |             |             |              |             |              |              |              |              |             |             |             |             |             |             |            |
|-----------------------------------------------------------------------------------------------------|-------------|-----------|-----------|------|------|------|---------|-------------|--------------|-------------|-------------|--------------|-------------|--------------|--------------|--------------|--------------|-------------|-------------|-------------|-------------|-------------|-------------|------------|
| Symptosomal-associated protein 29                                                                   | SNAP29      | 39434000  | 49295000  | 1.31 | 1.05 | 0.08 | 11.931  | -0.01281016 | -0.04039304  | -0.03583058 | 0.03520166  | 0.1749178    | 0.07313477  | 0.3561438    | NaN          | NaN          | 0.03674946   | -0.7850794  | 0.16221     | NaN         | 0.08827728  | 6.11102     | 1.21        | 0.00357558 |
| Splicing factor 3A subunit 3                                                                        | SF3A3       | 16270000  | 23111000  | 1.37 | 1.05 | 0.08 | 8.2331  | 0.255682    | 0.144568     | 0.2683145   | NaN         | 0.02288520   | -0.0713151  | NaN          | NaN          | NaN          | 0.04012096   | 0.08827728  | 6.11102     | 1.21        | 0.10778578  | NaN         | 1.2         | 0.10778578 |
| Sorting nexin-3                                                                                     | SNX3        | 58210000  | 7463000   | 1.33 | 1.05 | 0.08 | 1.3656  | 0.0240424   | 0.0505162    | 0.03034214  | 0.00834471  | 0.106003     | -0.58249    | -0.07051745  | NaN          | -0.01696448  | -0.161621    | 2.9961      | 0.152       | 0.04154988  | 0.161621    | 1.52        | 0.04154988  |            |
| Ras-related protein Ral-A                                                                           | RALA        | 22953000  | 35881000  | 1.42 | 1.05 | 0.08 | 15.754  | 0.03407487  | NaN          | -0.1659522  | -0.01773837 | NaN          | 0.06777637  | NaN          | NaN          | 0.2340108    | NaN          | -0.21682    | 8.27501     | 0.68        | 0.031295318 | NaN         | 0.031295318 |            |
| Rho GDP- dissociation inhibitor 1                                                                   | RHOA        | 63625000  | 85333000  | 1.38 | 1.05 | 0.08 | 10.409  | -0.01033776 | 0.03449741   | 0.06308875  | 0           | -0.02227314  | 0.005184378 | 0.01735182   | 0.04979509   | 0.06322866   | 0.1259155    | -0.06807495 | 0.2839217   | 8.6762      | 1.06        | 0.07503763  |             |            |
| Transcription elongation factor A protein 1                                                         | TCF1A       | 26696900  | 4908000   | 1.67 | 1.05 | 0.08 | 8.508   | NaN         | NaN          | 0.4627853   | NaN         | 0.02290045   | 0.2872358   | 0.07038926   | 0.1805297    | 0.04502534   | 0.1509595    | NaN         | NaN         | 0.23262     | 1.65        | 0.18055666  | +           |            |
| Taxin                                                                                               | PCN1        | 201020000 | 26893000  | 1.36 | 1.05 | 0.08 | 13.214  | 0.002455682 | 0.0880558    | 0.08978382  | 0.05185929  | 0.09855437   | -0.01423726 | NaN          | NaN          | 0.005902907  | 0.108891     | 0.047405    | 0.24376     | 1.46        | 0.062195435 | +           |             |            |
| Protein Hic-1                                                                                       | HC107F3     | 9720000   | 1220600   | 1.60 | 1.05 | 0.08 | 12.448  | 0.0020028   | NaN          | -0.1501028  | NaN         | 0.178969     | 0.06441288  | 0.117869     | 0.04334458   | 0.136713     | 0.0204239    | 0.186161    | 8.6161      | 0.03739862  | NaN         | 1.0         | 0.03739862  |            |
| Leucine-rich PPR motif-containing protein, mitochondrial                                            | LRPPRC      | 304120000 | 365920000 | 1.24 | 1.05 | 0.08 | 8.7802  | 0.00515688  | 0.08963377   | 0.0727232   | 0.06295063  | 0.2451581    | 0.05158305  | 0.05699965   | 0.07321736   | 0.1222089    | 0.09815002   | 0.111432    | 0.08297509  | 1.96506     | 5.71        | 0.075009387 | +           |            |
| Disophosphomalonate decarboxylase                                                                   | MVD         | 82193000  | 98668000  | 1.20 | 1.05 | 0.07 | 20.729  | 0.1583179   | -0.07614347  | 0.1283769   | 0.2327835   | -0.235462    | -0.2477413  | NaN          | NaN          | NaN          | -0.2400772   | -0.299087   | NaN         | NaN         | 9.22101     | 0.04        | 0.00911913  |            |
| Actin repressin protein 2/3 complex subunit 4                                                       | ARPC4       | 156400000 | 21732000  | 1.39 | 1.05 | 0.07 | 11.047  | 0.01135241  | 0.09166046   | 0.1705666   | 0.08188124  | 0.021275442  | 0.08243907  | 0.07131073   | 0.01104035   | 0.08778818   | 0.1895111    | 0.02218017  | 6.54104     | 1.04        | 0.08238853  | +           |             |            |
| Thimet oligopeptidase                                                                               | THOP1       | 68740000  | 86179000  | 1.33 | 1.05 | 0.07 | 24.726  | 0.0265876   | 0.04781753   | 0.034306451 | 0.0500489   | 0.2523594    | 0.08445289  | 0.1527676    | NaN          | NaN          | -0.05154864  | NaN         | NaN         | 5.8262      | 1.23        | 0.067447349 | +           |            |
| Signal recognition particle receptor subunit beta                                                   | SRPB        | 85844000  | 11008000  | 1.40 | 1.05 | 0.07 | 4.1607  | -0.02947023 | 0.06087747   | 0.009490535 | 0.05764644  | -0.03112038  | 0.02843897  | 0.3807295    | 0.2679552    | 0.0345289    | 0.4049031    | 0.3163976   | 7.2763      | 2.14        | 0.17334733  | +           |             |            |
| Tubulin-specific chaperone E                                                                        | TBCE        | 60701000  | 86777000  | 1.31 | 1.05 | 0.07 | 9.9209  | 0.04725923  | 0.1414329    | -0.0602619  | 0.1194226   | NaN          | 0.1306654   | NaN          | NaN          | NaN          | 0.1263122    | -0.1040614  | 2.0061      | 0.70        | 0.05399556  | +           |             |            |
| RuvB-like 2                                                                                         | RUBB2       | 736740000 | 119820000 | 1.32 | 1.05 | 0.07 | 6.0723  | 0.1382902   | 0.145221     | 0.08854871  | 0.0889452   | -0.007057603 | 0.09071802  | -0.00055003  | NaN          | NaN          | 0.0321009    | -0.0456101  | 5.8482      | 1.23        | 0.051113421 | +           |             |            |
| Proteasome subunit beta type-1                                                                      | PSMB1       | 41523000  | 56807000  | 1.41 | 1.05 | 0.07 | 8.6339  | 0.0528319   | 0.08773442   | -0.04080037 | 0.004752986 | 0.03885755   | 0.07107621  | 0.1357076    | 0.01490768   | 0.08215749   | 0.02155539   | 0.07321157  | 7.5262      | 1.12        | 0.03797682  | +           |             |            |
| Transportin-3                                                                                       | TNP3        | 7522000   | 9778500   | 1.27 | 1.05 | 0.07 | 14.45   | 0.100574    | 0.1755566    | 0.1660727   | 0.1015157   | 0.1296127    | 0.2159891   | 0.133432     | 0.00633955   | NaN          | 0.01192487   | NaN         | 0.1192898   | 3.7464      | 3.43        | 0.116030128 | +           |            |
| Aldehyde dehydrogenase X, mitochondrial                                                             | ALDH1B1     | 14187000  | 19647000  | 1.31 | 1.05 | 0.07 | 11.563  | 0.1141004   | 0.04062129   | 0.02091112  | 0.04572251  | 0.1278974    | 0.05783146  | NaN          | 0.3000651    | NaN          | NaN          | 0.2828548   | 0.3808114   | 6.8663      | 2.16        | 0.144183934 | +           |            |
| Platelet activating factor acetylhydrolase IB subunit gamma                                         | PAFAH1B3    | 16392000  | 22209000  | 1.45 | 1.05 | 0.07 | 9.3226  | 0.05241581  | -0.000202008 | 0.03054793  | 0.07327176  | 0.07942928   | 0.005328146 | 0.19154626   | 0.04907312   | -0.01997472  | 0.2566484    | 0.05311337  | 0.456701    | 2.5262      | 1.60        | 0.102273481 | +           |            |
| Proteasome activator complex subunit 1                                                              | PSME1       | 87495000  | 12236800  | 1.43 | 1.05 | 0.07 | 10.832  | 0.139361    | -0.08710491  | 0.1037661   | 0.0769599   | 0.1476416    | -0.0734949  | 0.1096078    | 0.05505682   | -0.05868019  | 0.05505682   | 0.05868019  | 5.8561      | 0.23        | 0.02589828  | +           |             |            |
| 14-3-3 protein zeta/delta                                                                           | YWH4Z       | 346920000 | 508219000 | 1.55 | 1.05 | 0.07 | 11.247  | 0.06708801  | 0.1199537    | 0.09855437  | 0.1414329   | 0.1062144    | 0.165301    | 0.0292761    | 0.04781753   | 0.04294245   | 0.004896797  | -0.00955338 | 0.0207689   | 1.2863      | 2.89        | 0.0695562   | +           |            |
| Phosphatidylethanolamine-binding protein                                                            | PFBP1       | 64290000  | 94294000  | 1.52 | 1.05 | 0.07 | 7.1033  | 0.100574    | 0.05852425   | 0.38998     | 0.1146336   | 0.01920368   | -0.02145292 | NaN          | 0.08147596   | 0.1566554    | 0.02800333   | 1.04643     | 2.89        | 0.062735468 | +           |             |             |            |
| Lysophosphatidylcholine acetylcholinesterase                                                        | SSB         | 140140000 | 181330000 | 1.30 | 1.05 | 0.07 | 11.527  | 0.06060078  | 0.02814484   | 0.1176951   | 0.09166604  | 0.07532719   | 0.02701252  | 0.1115565    | 0.0919667    | 0.1977397    | 0.09356022   | -0.03717705 | -0.04400288 | 5.0963      | 0.29        | 0.067839052 | +           |            |
| Serine/threonine-protein phosphatase 5                                                              | PPP5C       | 8445900   | 11127000  | 1.33 | 1.05 | 0.07 | 7.989   | 0.2773897   | 0.1310337    | 0.1236427   | 0.03083044  | 0.05769283   | 0.1194226   | NaN          | -0.241724    | -0.579856    | -0.4666758   | 5.4761      | 0.26        | -0.06218766 | +           |             |             |            |
| Metaxin-2                                                                                           | MTX2        | 2688700   | 3996800   | 1.61 | 1.05 | 0.07 | 10.454  | 0.1273893   | 0.08732703   | 0.1815478   | 0.03407487  | 0.1513393    | 0.03407487  | 0.1513393    | 0.1616942    | NaN          | -0.0963292   | NaN         | 1.85542     | 1.34        | 0.09220532  | +           |             |            |
| Peptidyl prolyl cis-trans isomerase A/Peptidyl prolyl cis-trans isomerase A, N-terminally processed | PP1A        | 454420000 | 685940000 | 1.37 | 1.05 | 0.07 | 17.729  | 0.004033884 | 0.05440842   | 0.0494913   | 0.09734114  | 0.02856912   | 0.07860982  | 0.1146153    | 0.0246443    | 0.1055439    | 0.1198209    | 1.8264      | 3.74        | 0.069847318 | +           |             |             |            |
| Tap endonuclease 1                                                                                  | FEN1        | 39023000  | 53181000  | 1.28 | 1.05 | 0.07 | 6.4841  | 0.1324014   | 0.06060078   | 0.2789363   | 0.1116991   | -0.02240502  | 0.02842765  | 0.01993143   | 0.1938348    | 0.1175621    | 0.1746621    | 0.1068003   | 0.1227389   | 7.63504     | 3.12        | 0.109621514 | +           |            |
| TAR DNA-binding protein 1                                                                           | TARDBP      | 20295000  | 26214000  | 1.51 | 1.05 | 0.07 | 16.818  | 0.09139519  | 0.1282935    | 0.1467856   | 0.04292445  | -0.01722728  | 0.03731201  | 0.1781091    | 0.01106615   | -0.02985311  | NaN          | NaN         | 1.1561      | 0.94        | 0.048519363 | +           |             |            |
| 35S ribosomal protein L44, mitochondrial                                                            | MRPL44      | 1321300   | 1951700   | 1.27 | 1.05 | 0.07 | 6.3834  | -0.0195445  | 0.05995817   | 0.0734089   | 0.0278618   | 0.02941749   | NaN         | 0.1031283    | 0.180289     | NaN          | 0.08133958   | NaN         | 1.9761      | 0.71        | 0.18420537  | +           |             |            |
| Ubiquitin-conjugating enzyme E2 N/putative ubiquitin-conjugating enzyme E2 N-like                   | UBE2N/UBE2L | 20776000  | 39575000  | 1.34 | 1.05 | 0.07 | 12.833  | -0.01266949 | 0.07762858   | 0.1772987   | 0.0586628   | 0.02775413   | 0.05949366  | -0.03655548  | -0.05072657  | 0.166616     | 0.1010874    | 6.9661      | 0.16        | 0.013286296 | +           |             |             |            |
| Protein NipSnap homolog 3A                                                                          | NIPSNAP3A   | 2780400   | 3992400   | 1.53 | 1.05 | 0.07 | 10.977  | 0.1259155   | 0.2901885    | 0.1547128   | 0.0563354   | 0.2404747    | NaN         | NaN          | NaN          | -0.0442291   | NaN          | NaN         | -0.585447   | 7.3261      | 0.14        | 0.050529729 | +           |            |
| Calcyclin-binding protein                                                                           | CACBP       | 87781000  | 12087000  | 1.45 | 1.05 | 0.07 | 9.7699  | 0.163241    | 0.0586628    | 0.01077991  | 0.09504669  | 0.07217448   | 0.115566    | 0.03280615   | -0.002367994 | -0.000476127 | -0.1030075   | -0.05586124 | 9.2062      | 1.04        | 0.004077957 | +           |             |            |
| Protein phosphatase 6 homolog                                                                       | THOC6       | 5262800   | 8546400   | 1.57 | 1.05 | 0.07 | 7.2386  | 0.05949366  | 0.1914362    | 0.2459823   | 0.2393981   | 0.08759707   | 0.07860982  | 0.0202611    | 0.07860982   | 0.2151506    | 0.14954      | 0.02587931  | 8.52548     | 2.07        | 0.17231385  | +           |             |            |
| Nucleoporin TPR                                                                                     | TPR         | 492310000 | 53677000  | 1.37 | 1.05 | 0.07 | 16.043  | 0.01528023  | 0.05185929   | 0.1510907   | 0.2302638   | -0.16738718  | 0.03409353  | -0.009547836 | -0.158179    | 0.031849174  | -0.04192198  | 0.002778459 | 3.9661      | 0.40        | 0.024340078 | +           |             |            |
| U6 snRNP-associated 5' cap protein Lsm8                                                             | LSMB        | 4555800   | 5110500   | 1.53 | 1.05 | 0.07 | 6.3191  | 0.2892443   | 0.11089748   | NaN         | NaN         | NaN          | 0.1260478   | -0.01184891  | -0.04622077  | -0.08718155  | -0.005304398 | 0.05255495  | 2.4961      | 0.60        | 0.053523532 | +           |             |            |
| Serine-specific demethylase 3B                                                                      | KDM3B       | 2794100   | 2699300   | 1.11 | 1.05 | 0.07 | 15.289  | NaN         | -0.1197926   | 0.02772026  | -0.4096423  | -0.01349442  | 0.06915226  | 1.578504     | NaN          | NaN          | 0.5069066    | 0.3102228   | 2.9261      | 0.54        | 0.243697192 | +           |             |            |
| Moosin                                                                                              | MSN         | 299300000 | 40043000  | 1.38 | 1.05 | 0.07 | 18.449  | -0.02902857 | 0.000576887  | 0.1050075   | 0.1055439   | 0.002306507  | 0.01664337  | 0.1134338    | 0.1483484    | 0.169925     | 0.1003409    | 0.05533457  | 1.119661    | 3.4463      | 2.46        | 0.072256314 | +           |            |
| Small glutamine-rich tetratricopeptide repeat-containing protein alpha                              | SGTA        | 7524200   | 11111000  | 1.38 | 1.05 | 0.07 | 12.215  | 0.04753336  | 0.1062144    | 0.07121356  | 0.1470462   | 0.1314503    | 0.03604614  | 0.0878702    | 0.00977712   | 0.1863738    | -0.02000933  | 0.782227    | 0.02587931  | 7.5563      | 0.23        | 0.107636681 | +           |            |
| Ras-related protein Rab-14                                                                          | RAB14       | 19760000  | 26546000  | 1.36 | 1.05 | 0.07 | 9.6751  | -0.09311366 | 0.04208399   | -0.01228624 | 0.08460858  | 0.177599     | -0.3245272  | -0.4677746   | -0.177599    | -0.7545287   | -0.3433114   | NaN         | NaN         | 6.7562      | 0.47        | 0.051827665 | +           |            |
| C-terminal-binding protein 1                                                                        | CTBP1       | 2848300   | 3501800   | 1.59 | 1.05 | 0.07 | 13.734  | 0.01884875  | NaN          | 0.01884875  | NaN         | 0.2208253    | -0.04188740 | 0.011006364  | 0.1098286    | NaN          | NaN          | 3.2961      | 0.48        | 0.05473605  | +           |             |             |            |
| Protein phosphatase 1                                                                               | PP1A        | 2780400   | 3992400   | 1.45 | 1.05 | 0.07 | 7.6807  | 0.0242337   | 0.07797543   | 0.07409441  | 0.1318886   | 0.1479579    | -0.0750081  | 0.00605508   | -0.01663876  | -0.00469926  | 0.00699262   | 1.34601     | 0.87        | 0.004873518 | +           |             |             |            |
| 10 kDa heat shock protein, mitochondrial                                                            | HSP60       | 20831000  | 30525000  | 1.44 | 1.05 | 0.07 | 12.6951 | 0.07346403  | 0.03265109   | 0.1240634   | 0.08759864  | 0.0984196    | 0.265677    | 0.1789832    | 0.05185929   | 0.0178311666 | 0.007731201  | 0.02941749  | 5.5653      | 2.25        | 0.02941749  | +           |             |            |
| Exportin-2                                                                                          | CSE1L       | 205310000 | 304600000 | 1.28 | 1.05 | 0.07 | 9.7814  | 0.08909126  | 0.1156992    | 0.02800333  | 0.0745054   | 0.09423606   | 0.13371     | -0.04578878  | -0.04574413  | -0.0557631   | -0.02592594  | -0.05265548 | -0.04462767 | 3.2761      | 0.49        | 0.027260575 | +           |            |
| Leucine-rich repeat-containing protein 47                                                           | LRRC47      | 11448000  | 14523000  | 1.45 | 1.05 | 0.07 | 11.441  | -0.0446263  | -0.09946353  | -0.         |             |              |             |              |              |              |              |             |             |             |             |             |             |            |

|                                                                         |               |           |           |      |      |      |         |              |              |              |             |             |             |             |             |             |             |             |              |             |              |              |             |   |
|-------------------------------------------------------------------------|---------------|-----------|-----------|------|------|------|---------|--------------|--------------|--------------|-------------|-------------|-------------|-------------|-------------|-------------|-------------|-------------|--------------|-------------|--------------|--------------|-------------|---|
| Splicing factor U2AF 35 kDa subunit;Splicing factor U2AF 26 kDa subunit | U2AF1,U2AF314 | 59908000  | 93660000  | 1,34 | 1,03 | 0,04 | 2,6543  | 0,06557227   | 0,116764     | 0,1613072    | 0,1839629   | -0,1172396  | -0,02445785 | -0,01073016 | 0,0979967   | 0,005471901 | NaN         | NaN         | 0,01120934   | 1,09601     | 0,06         | 0,056166974  | 0,014       |   |
| Peptidylarginine deiminase 4                                            | PRDM6         | 232920000 | 335880000 | 1,42 | 1,03 | 0,04 | 10,904  | 0,02743714   | 0,03773769   | 0,03322932   | 0,02389408  | 0,05018827  | 0,06009471  | 0,07066408  | 0,03829577  | 0,02274327  | 0,0551957   | 0,05893986  | 0,05380643   | 1,04e06     | 5,98         | 0,044325492  | +           |   |
| Proteasome assembly chaperone 1                                         | PSMG1         | 54435000  | 51900000  | 1,26 | 1,03 | 0,04 | 8,5339  | 0,0482624    | 0,02777292   | 0,03040665   | 0,06695026  | 0,1419359   | 0,0715123   | 0,06280626  | 0,02351908  | -1,431365   | -2,368965   | NaN         | NaN          | 2,21e01     | 0,98         | 0,34871351   | 0           |   |
| SUMO-conjugating enzyme UBC9                                            | UBM2          | 86640000  | 10684000  | 1,30 | 1,03 | 0,04 | 8,0234  | 0,1042025    | -0,01305762  | 0,212939     | 0,120352    | -0,1050852  | -0,750488   | 0,1811662   | 0,2584909   | NaN         | NaN         | NaN         | 0,2097652    | 0,06832678  | 3,89e02      | 1,41         | 0,097150098 | 0 |
| Ras-related protein Rab-7A                                              | RAB7A         | 48307000  | 742740000 | 1,44 | 1,03 | 0,04 | 7,4081  | -0,00609816  | -0,002766791 | 0,01920368   | 0,02323228  | 0,0542234   | 0,02587391  | 0,1012467   | 0,1488691   | 0,073737969 | 0,027151413 | 0,08474465  | 0,01035019   | 2,12e02     | 1,67         | 0,042451031  | +           |   |
| Protein phosphatase methyltransferase 1                                 | PPM1          | 86765000  | 10810000  | 1,28 | 1,03 | 0,04 | 10,481  | -0,05492416  | -0,1765836   | 0,0460635    | 0,0106815   | 0,03421579  | 0,0534495   | 0,36131592  | NaN         | NaN         | NaN         | NaN         | NaN          | 2,54e01     | 0,59         | 0,075116088  | 0           |   |
| Uroguanylin/relaxin deacylase 1                                         | URCD          | 17780000  | 48121000  | 1,30 | 1,03 | 0,04 | 17,8800 | 0,0955687    | 0,03574464   | 0,0939657    | 0,1013812   | 0,0528119   | 0,0640772   | 0,118715    | 0,2946148   | NaN         | NaN         | NaN         | 0,12310612   | 2,12e01     | 0,65         | 0,089919271  | 0           |   |
| Phosphotyrosine kinase 1                                                | PPK1          | 49306000  | 600070000 | 1,52 | 1,03 | 0,04 | 11,745  | -0,1552068   | -0,118506    | -0,06831692  | -0,03136181 | -0,103165   | -0,09966448 | 0,2065182   | 0,2368784   | 0,270828    | 0,2576141   | NaN         | 0,2730495    | 3,18e01     | 0,50         | 0,058210837  | 0           |   |
| Profilin-1                                                              | PFN1          | 246270000 | 348660000 | 1,45 | 1,03 | 0,04 | 5,7167  | -0,04990488  | -0,04181805  | -0,00296035  | 0,03435652  | 0,02517066  | 0,1191569   | 0,0494913   | 0,1112984   | 0,01292609  | 0,04194384  | 0,05907837  | 0,01849174   | 5,75e02     | 1,24         | 0,014315866  | 0           |   |
| Acidic leucine-rich nuclear phosphoprotein 32 family member A           | ANP32A        | 49470000  | 70680000  | 1,35 | 1,03 | 0,04 | 8,9997  | 0,09301919   | 0,02941749   | 0,05713834   | 0,05158086  | 0,0693644   | 0,05505682  | -0,04791998 | 0,03953276  | NaN         | 0,05507594  | 0,03922143  | -0,01222805  | 2,37e01     | 0,06         | 0,020284719  | 0           |   |
| Signal recognition particle 14 kDa subunit                              | SRP14         | 65421000  | 94356000  | 1,22 | 1,03 | 0,04 | 15,738  | -0,2895274   | -0,3353897   | -0,2350764   | -0,01355266 | 0,05699965  | -0,1495206  | 0,3096921   | 0,2723816   | 0,2696317   | 0,2110122   | 0,3537749   | 0,2516888    | 4,44e01     | 0,35         | 0,05828019   | 0           |   |
| DNA replication licensing factor MCM6                                   | MCM6          | 913794000 | 109920000 | 1,19 | 1,03 | 0,04 | 11,197  | 0,09369545   | 0,0292761    | 0,007626157  | 0,01374199  | -0,02102828 | 0,1164979   | -0,1506681  | -0,1314713  | 0,1249158   | 0,06073913  | 0,01065748  | 0,1200904    | 9,52e01     | 0,60         | 0,066168915  | 0           |   |
| Serine hydroxymethyltransferase, mitochondrial                          | SHMT2         | 76014000  | 86300000  | 1,28 | 1,03 | 0,04 | 24,702  | 0,08447251   | -0,04620585  | 0,1749378    | 0,03562387  | 0,131326    | -0,01167521 | -0,2797556  | -0,1664865  | NaN         | NaN         | -0,1339229  | -0,1401735   | 4,63e01     | 0,33         | 0,035188032  | 0           |   |
| Splicing factor U2AF 65 kDa subunit                                     | U2AF2         | 18940000  | 24948000  | 1,18 | 1,03 | 0,04 | 18,244  | 0,2037005    | -0,1010565   | 0,1708224    | -0,01506799 | 0,08859219  | 0,08776401  | 0,5173261   | 0,3999913   | 0,4842412   | 0,623794    | 0,347212    | 0,2242336    | 1,22e02     | 1,91         | 0,188795541  | 0           |   |
| 14-3-3 protein gamma,14-3-3 protein gamma, N-terminally processed       | YWHAG         | 47848000  | 67167000  | 1,32 | 1,03 | 0,04 | 6,0371  | 0,02984157   | 0,008917032  | -0,007956751 | 0,09193667  | -0,06589875 | 0,04670055  | 0,1071523   | 0,1847246   | 0,1925916   | 0,1011918   | 0,1802754   | 4,85e03      | 2,31        | 0,086728712  | +            |             |   |
| Alpha-actinin;Beta-actinin                                              | ACTR1A,ACTR1B | 18234000  | 22062000  | 1,30 | 1,03 | 0,04 | 12,073  | 0,163241     | 0,1531393    | 0,1241958    | -0,05029322 | -0,02116004 | 0,1096949   | -0,101041   | NaN         | NaN         | NaN         | 0,01876993  | -0,008812854 | 2,73e01     | 0,56         | 0,038599328  | 0           |   |
| Heme oxygenase 2                                                        | HMOX2         | 20955000  | 22345000  | 1,23 | 1,03 | 0,04 | 14,876  | 0,04278438   | 0,09422806   | 0,2444       | -0,0564723  | NaN         | 0,07070238  | -0,230572   | -0,2431937  | -0,1356653  | NaN         | NaN         | 0,020201     | 0,40        | 0,050898948  | 0            |             |   |
| Very-long-chain enoyl-CoA reductase                                     | TCR           | 58514000  | 69672000  | 1,21 | 1,03 | 0,04 | 17,554  | NaN          | 0,08962377   | 0,0432004    | -0,0706463  | 0,1212807   | 0,04495508  | NaN         | 0,11709     | 0,06598585  | 0,08488071  | NaN         | NaN          | 8,78e02     | 1,06         | 0,088423511  | 0           |   |
| 2-deoxynucleoside 5-phosphate-N-Hydrolase 1                             | DNPH1         | 10589000  | 14639000  | 1,36 | 1,03 | 0,04 | 13,16   | 0,07066408   | -0,1659846   | 0,3852554    | NaN         | 0,1471764   | -0,1821476  | -0,1009312  | -0,1248243  | NaN         | NaN         | NaN         | 0,2713741    | 8,90e01     | 0,05         | -0,030030008 | 0           |   |
| DNA polymerase-epsilon subunit 3                                        | POLC1         | 40772000  | 4310000   | 1,09 | 1,02 | 0,04 | 16,524  | 0,2167342    | -0,2486391   | -0,269008    | -0,3259191  | 0,1376347   | -0,158894   | -0,03584539 | 0,005759195 | NaN         | 0,0321009   | NaN         | NaN          | 3,15e01     | 0,50         | -0,06700755  | 0           |   |
| BRCA1 and CTRX1A-interacting protein                                    | PCIP          | 53432000  | 16571000  | 1,31 | 1,02 | 0,03 | 8,8561  | 0,0441843    | 0,03745244   | 0,01168977   | -0,09101805 | -0,02155615 | -0,04968092 | 0,03460356  | NaN         | -0,1937317  | -0,08479267 | NaN         | NaN          | 1,38e01     | 0,86         | 0,0764715396 | 0           |   |
| Cytochrome c                                                            | CYCS          | 37545000  | 53480000  | 1,35 | 1,02 | 0,03 | 12,358  | 0,157833     | 0,1494464    | 0,1737005    | 0,1138339   | -0,154885   | -0,05755682 | -0,154885   | -0,0454086  | -0,07287327 | -0,0454086  | -0,07287327 | -0,0454086   | 8,45e01     | 0,24         | 0,00789929   | 0           |   |
| Microtubule-associated transfer protein beta isoform                    | PTPBN         | 27061000  | 38452000  | 1,26 | 1,02 | 0,03 | 10,514  | -0,00614508  | -0,05707642  | 0,04320455   | 0,1037997   | -0,129059   | 0,05810868  | NaN         | -0,03584539 | 0,005759195 | NaN         | 0,0321009   | NaN          | 3,55e01     | 0,49         | 0,022948243  | 0           |   |
| Phosphatidyl-inositol protein R9/EB family member 1                     | MAPRE1        | 20182000  | 26638000  | 1,24 | 1,02 | 0,03 | 13,241  | 0,1344838    | 0,2529       | 0,1685137    | -0,0801366  | 0,01621099  | -0,134778   | -0,04589308 | 0,003602319 | -0,07740631 | -0,06845307 | 0,511e01    | 0,25         | 0,023063778 | 0            |              |             |   |
| MICOS complex subunit MIC19                                             | CHCHD3        | 16078000  | 20703000  | 1,34 | 1,02 | 0,03 | 15,113  | 0,04572251   | 0,07189995   | -0,05533457  | 0,03083044  | 0,03393193  | NaN         | 0,07267816  | -0,02104294 | -0,196872   | NaN         | 9,85e01     | 0,01         | 0,000534451 | 0            |              |             |   |
| Proteasome complex alpha type-5                                         | PSMA5         | 67429000  | 90288000  | 1,39 | 1,02 | 0,03 | 4,8838  | 0,006477609  | 0,01849174   | -0,05482255  | 0,00865129  | 0,0177663   | -0,04851514 | -0,21710956 | -0,2048482  | -0,04510394 | -0,04449513 | -0,0719974  | 8,80e02      | 1,06        | 0,051426133  | 0            |             |   |
| COP9 signalosome complex subunit 6                                      | COP6          | 17615000  | 21361000  | 1,21 | 1,02 | 0,03 | 17,206  | 0,1761500    | -0,2509134   | NaN          | 0,1397      | 0,92325     | NaN         | 0,0617706   | 0,0726134   | 0,2726134   | 0,2726134   | 0,2726134   | 1,56e01      | 0,01        | 0,100213631  | 0            |             |   |
| Protein deglycase Di-1                                                  | PARK7         | 62435000  | 87758000  | 1,36 | 1,02 | 0,03 | 7,6024  | 0,03506084   | -0,02514765  | -0,0139896   | 0,001442041 | -0,01192247 | -0,00843551 | 0,09324277  | 0,01521204  | -0,01692064 | 0,02587391  | 0,07025199  | 0,0818453    | 1,21e01     | 0,92         | 0,018801536  | 0           |   |
| 3-hydroxyacyl-CoA dehydrogenase type-2                                  | HSD17B10      | 56309000  | 79305000  | 1,48 | 1,02 | 0,03 | 5,434   | 0,09545191   | 0,009347181  | 0,06750099   | 0,02941749  | 0,06681251  | 0,03421579  | -0,04663788 | -0,02004788 | 0,04628166  | -0,0137962  | 0,145e01    | 0,29         | 0,02201419  | 0            |              |             |   |
| Peptidyl-glycyl cist-trans isomerase NIMA-interacting 1                 | PIN1          | 34144000  | 39527000  | 1,26 | 1,02 | 0,03 | 14,331  | -0,021218434 | 0,1164579    | NaN          | 0,2808376   | NaN         | 0,2205776   | NaN         | -0,2353821  | NaN         | 0,000721115 | NaN         | -0,06760617  | 8,41e01     | 0,27         | 0,043351655  | 0           |   |
| Tubulin beta-3 chain                                                    | TUBB3         | 76636000  | 87121000  | 1,37 | 1,02 | 0,03 | 27,603  | 0,0167341    | 0,05939875   | -0,0499168   | NaN         | 0,724257    | -0,1618326  | -0,302178   | -0,4841665  | -0,4841665  | -0,4841665  | -0,4841665  | -0,4841665   | 4,59e01     | 0,24         | 0,117544568  | 0           |   |
| Leucine-rich repeat-containing protein 59                               | LRRC59        | 33131000  | 50039000  | 1,14 | 1,02 | 0,03 | 5,9022  | -0,170081    | -0,04595524  | -0,0724867   | -0,14264    | -0,0087218  | 0,2050929   | 0,1545093   | 0,09234277  | 0,08573207  | 0,1062124   | 0,095133062 | 0,145e01     | 0,09        | 0,008678225  | 0            |             |   |
| Golg to ER traffic protein 4 homolog                                    | GET4          | 19044000  | 31085000  | 1,43 | 1,02 | 0,03 | 20,006  | 0,1278974    | 0,000721115  | NaN          | 0,09247811  | 0,2215678   | -0,1059889  | NaN         | 0,04935203  | -0,06282134 | -0,05160844 | -0,02983485 | 4,66e01      | 0,33        | 0,026867693  | 0            |             |   |
| Ubiquitin-conjugating enzyme E2 L3                                      | UBE2L3        | 35919000  | 51269000  | 1,42 | 1,02 | 0,03 | 9,3635  | -0,04452355  | 0,04483868   | -0,05706139  | -0,07043619 | -0,03563833 | 0,1206174   | 0,07956584  | 0,06267433  | 0,04376442  | 0,1298765   | 0,05144163  | 6,70e01      | 0,03        | 0,017237051  | 0            |             |   |
| Tubulin-tyrosine ligase-like protein 12                                 | TTL12         | 28383000  | 35662000  | 1,37 | 1,02 | 0,03 | 16,289  | 0,1389242    | 0,728347     | 0,0984196    | 0,1409905   | 0,005184378 | 0,2067862   | -0,1002885  | -0,0161618  | -0,1279829  | 0,09342498  | -0,134097   | -0,001732303 | 1,78e01     | 0,75         | 0,068474997  | 0           |   |
| Premittin-like splicing factor ATP-dependent RNA helicase DHX15         | DX15          | 32405000  | 42913000  | 1,50 | 1,02 | 0,03 | 14,946  | -0,1130831   | -0,271978291 | 0,2741984    | -0,1526651  | -0,1316505  | -0,125543   | -0,03166587 | 0,01259497  | 0,02941749  | 0,09747601  | 0,09761087  | 7,46e01      | 0,13        | 0,013167547  | 0            |             |   |
| Calpain-1 catalytic subunit                                             | CAPN1         | 10410000  | 53651000  | 1,25 | 1,02 | 0,03 | 11,22   | -0,09260171  | 0,08420031   | 0,1244606    | 0,0012096   | 0,005759195 | 0,1356662   | 0,200523    | -0,182078   | -0,245027   | -0,05715797 | -0,1549074  | 8,47e01      | 0,07        | -0,009204696 | 0            |             |   |
| Proteasome subunit alpha type-2                                         | PSMA2         | 36962000  | 49408000  | 1,32 | 1,02 | 0,03 | 10,313  | 0,02531228   | 0,01092296   | -0,000634928 | 0,02630426  | 0,01849174  | 0,060052907 | 0,09261344  | -0,02801326 | 0,0460551   | 0,08596853  | 0,08814155  | 0,07573799   | 7,08e03     | 2,15         | 0,038733547  | +           |   |
| 15S ribosomal protein L13, mitochondrial                                | MRPL13        | 27277000  | 5690000   | 1,25 | 1,02 | 0,03 | 19,337  | -0,0510242   | -0,09398765  | 0,1197188    | -0,04007312 | -0,0216923  | -0,05060744 | NaN         | 0,1481786   | 0,165594    | NaN         | NaN         | 3,24e01      | 0,01        | 0,11848008   | 0            |             |   |
| Semaphorin synthase                                                     | SEM           | 12233000  | 15752000  | 1,21 | 1,02 | 0,02 | 11,664  | 0,03195977   | 0,02460336   | -0,1768377   | -0,07173962 | -0,1357445  | -0,0544223  | 0,1557492   | -0,20997419 | -0,6255113  | -0,2609997  | 9,87e02     | 1,01         | 0,104617638 | 0            |              |             |   |
| Cytosolic nucleic acid-binding protein                                  | CNBP          | 6150100   | 7268700   | 1,54 | 1,02 | 0,02 | 16,574  | -0,6305279   | -0,4284837   | -0,4007965   | -0,234286   | -0,6466089  | -0,5762604  | 0,0805122   | 0,04781753  | 0,0745054   | 0,04921259  | 0,1249898   | 0,06255996   | 3,45e02     | 1,46         | -0,230338306 | 0           |   |
| Isocitrate dehydrogenase (NAD) subunit alpha, mitochondrial             | IDH3A         | 4988800   | 7372700   | 1,45 | 1,02 | 0,02 | 7,8903  | 0,312549     | 0,2631546    | 0,2263851    | 0,2368294   | 0,3530974   | 0,1244606   | NaN         | 0,1008431   | -0,05700473 | 0,0551957   | NaN         | NaN          | 3,45e03     | 2,46         | 0,17979374   | +           |   |
| Heat shock protein beta-1                                               | HSPB1         | 8875000   | 11776000  | 1,44 | 1,02 | 0,   |         |              |              |              |             |             |             |             |             |             |             |             |              |             |              |              |             |   |

|                                                                                             |                    |           |           |      |      |       |        |              |              |              |              |              |              |              |              |              |              |             |              |             |              |              |
|---------------------------------------------------------------------------------------------|--------------------|-----------|-----------|------|------|-------|--------|--------------|--------------|--------------|--------------|--------------|--------------|--------------|--------------|--------------|--------------|-------------|--------------|-------------|--------------|--------------|
| T-complex protein 1 subunit beta                                                            | CC22               | 368020000 | 481560000 | 1,27 | 1,00 | 0,00  | 6,8598 | 0,02772026   | -0,0151701   | -0,000808115 | 0,01564032   | 0,0413831    | -0,02456054  | 0,003458378  | -0,06435923  | 0,6610199    | 0,2380531    | -0,05917922 | -0,02504493  | 2,80E-01    | 0,55         | 0,066512737  |
| Eukaryotic translation initiation factor 6                                                  | EIF6               | 322710000 | 470380000 | 1,54 | 1,00 | 0,00  | 7,3302 | -0,02617566  | -0,0419756   | 0,0542747    | -0,0475427   | -0,04960625  | -0,02310851  | 0,08188502   | 0,05698585   | 0,124598     | 0,07942928   | 0,1852322   | 0,1008431    | 2,33E-02    | 1,63         | 0,07249402   |
| UTP-glucose-1-phosphate uridylyltransferase                                                 | UGP2               | 79472000  | 11460000  | 1,22 | 1,00 | 0,00  | 6,1345 | 0,08480871   | 0,0428156    | -0,03144473  | -0,00930376  | -0,05949498  | 0,00000000   | -0,00000000  | -0,00000000  | 0,131117     | -0,136762    | 0,0829664   | 0,040401     | 0,22        | 0,002903518  |              |
| 60 kDa heat shock protein, mitochondrial                                                    | HSPD1              | 751710000 | 991520000 | 1,28 | 1,00 | 0,00  | 5,4325 | 0,05060612   | 0,02304246   | 0,01720924   | 0,03421579   | -0,0278438   | 0,0535458    | -0,06880108  | -0,04651869  | -0,0522516   | -0,0315623   | 3,95E-01    | 0,00         | 0,021099913 | 0,00         | 0,002099913  |
| Adenylosuccinate lyase                                                                      | ADSL               | 8195100   | 10821000  | 1,30 | 1,00 | 0,00  | 10,387 | 0,2126316    | -0,01941891  | 0,6201171    | -0,0653696   | 0,4269625    | -0,001544543 | NaN          | NaN          | NaN          | 0,07915612   | -0,1531339  | 1,31E-01     | 0,88        | 0,154140865  |              |
| Nuclear mitotic apparatus protein 1                                                         | NUMA1              | 3264800   | 34938000  | 1,16 | 1,00 | 0,00  | 24,014 | NaN          | -0,009898116 | 0,06846439   | 0,2499914    | -0,147459    | -0,371777    | -0,08231617  | 0,09707135   | 0,1191569    | 0,1294808    | NaN         | 9,29E-01     | 0,03        | 0,005703994  |              |
| SUMO-activating enzyme subunit 1;SUMO-activating enzyme subunit 1, N-terminally processed   | SAE1               | 19108000  | 52930000  | 1,35 | 1,00 | -0,01 | 11,44  | 0,1013812    | 0,05018827   | 0,07874646   | -0,03799152  | 0,02417773   | 0,01464098   | -0,1117419   | 0,176267     | -0,1609434   | -0,1904045   | NaN         | 0,2156165    | 6,66E-01    | 0,18         | -0,015708823 |
| Adenylate kinase 2, mitochondrial;Adenylate kinase 2, mitochondrial, N-terminally processed | AK2                | 463850000 | 530930000 | 1,34 | 1,00 | -0,01 | 10,744 | -0,1979971   | -0,2143741   | -0,11868     | -0,1587997   | -0,14744     | -0,194966    | -0,1426999   | 0,001746074  | 0,00670215   | 0,1269729    | 0,08351974  | 4,34E-01     | 0,36        | 0,034268648  |              |
| Eukaryotic translation initiation factor 2 subunit 1                                        | EIF2S1             | 159990000 | 229610000 | 1,23 | 1,00 | -0,01 | 8,8961 | -0,04753228  | 0,01877663   | -0,1224285   | -0,06303866  | -0,09180192  | -0,07892934  | -0,07308965  | 0,06832678   | -0,03876184  | -0,03800636  | 0,1963684   | 0,1954736    | 8,48E-01    | 0,07         | -0,00607568  |
| ATP 11-cysteine synthase                                                                    | ACLY               | 183850000 | 211500000 | 1,00 | 1,00 | -0,01 | 12,394 | -0,05281446  | 0,03562387   | 0,05713834   | 0,06736329   | 0,051319     | -0,1761748   | -0,00000000  | -0,137117    | -0,1367852   | 0,0218931    | -0,00706551 | 1,75E-01     | 0,00        | 0,0019913925 |              |
| Hippocampin-like protein 1;Neuron-specific calcium-binding protein hippocampin              | HPICAL1;HPICA      | 1533400   | 20384000  | 1,39 | 1,00 | -0,01 | 3,3118 | -0,2348557   | -0,3081264   | NaN          | NaN          | NaN          | NaN          | NaN          | 0,1037997    | NaN          | 0,1135672    | 0,04474379  | 5,46E-01     | 0,25        | -0,056174272 |              |
| Protein SEC13 homolog                                                                       | SEC13              | 85510000  | 12150000  | 1,35 | 1,00 | -0,01 | 7,649  | 0,09410089   | 0,1368475    | -0,02132113  | 0,2576141    | -0,08326348  | 0,01388767   | -0,06830177  | -0,0665331   | -0,122925    | 0,02616273   | NaN         | NaN          | 7,19E-01    | 0,14         | 0,013812559  |
| SRP91NB                                                                                     | SRP91NB            | 50324000  | 61230000  | 1,30 | 1,00 | -0,01 | 6,9805 | 0,04963072   | 0,05921687   | 0,0415233    | 0,05254945   | 0,0546236    | -0,001339243 | -0,08025197  | -0,2567005   | -0,121615    | 0,2208263    | 0,2699907   | 7,86E-01     | 0,10        | 0,01215392   |              |
| Ras-related protein Rap-1b;Ras-related protein Rap-1b-like protein                          | RAP1B              | 352270000 | 470480000 | 1,38 | 0,99 | 0,01  | 6,3775 | 0,47044626   | -0,04739808  | 0,03933506   | -0,02139436  | -0,094437    | -0,05395794  | -0,005753356 | 0,1384539    | 0,121162     | 0,1989969    | 0,158854    | 0,07587489   | 1,08E-01    | 0,97         | 0,025289058  |
| Hsp90 co-chaperone Cdc37;Hsp90 co-chaperone Cdc37, N-terminally processed                   | CDC37              | 221310000 | 292970000 | 1,38 | 0,99 | -0,01 | 11,565 | -0,2493763   | -0,07929515  | -0,2466515   | -0,1528048   | -0,165483    | -0,03042763  | 0,1825652    | 0,2200823    | NaN          | NaN          | 0,1672295   | 0,02048441   | 5,64E-01    | 0,25         | -0,033366062 |
| Macrophage migration inhibitory factor                                                      | MMF                | 395540000 | 513850000 | 1,47 | 0,99 | -0,01 | 21,409 | -0,2088611   | -0,2125676   | -0,1622828   | -0,1641082   | -0,2034354   | -0,2197739   | 0,08011194   | 0,2067682    | 0,09301919   | 0,07724488   | 0,07710631  | 0,08888441   | 3,41E-01    | 0,37         | 0,0460674185 |
| NAD(P) transhydrogenase, mitochondrial                                                      | NNT                | 7660200   | 87999000  | 1,22 | 0,99 | -0,01 | 14,521 | -0,2526579   | NaN          | NaN          | -0,02089653  | -0,07239313  | 0,095722     | -0,1154412   | -0,05249094  | NaN          | NaN          | NaN         | NaN          | 4,73E-01    | 0,43         | 0,037991625  |
| T-complex protein 1 subunit gamma                                                           | CC23               | 355330000 | 463190000 | 1,28 | 0,99 | -0,01 | 8,5523 | 0,02147971   | 0,0284765    | 0            | -0,03157145  | 0,00120934   | 0,003889986  | -0,01642444  | -0,0496029   | -0,06638201  | -0,0169061   | 0,01549758  | 1,64E-01     | 0,78        | -0,016387773 |              |
| Ischochrysaline domain-containing protein 2, mitochondrial                                  | ISC2               | 27570000  | 35910000  | 1,35 | 0,99 | -0,01 | 5,5565 | -0,04550591  | 0,0311129    | NaN          | NaN          | -0,006782144 | 0,08854871   | NaN          | 0,10742      | -0,0638916   | NaN          | NaN         | 5,46E-01     | 0,26        | 0,018483649  |              |
| Far upstream element-binding protein 1                                                      | FUBP1              | 253590000 | 339910000 | 1,36 | 0,99 | -0,01 | 14,171 | 0,07162537   | 0,1032222    | -0,1859336   | -0,08071329  | -0,1940473   | -0,08256063  | -0,05794723  | 0,1048734    | 0,03606414   | 0,1521185    | 0,2332746   | 0,3319281    | 4,65E-01    | 0,33         | 0,035082183  |
| Cell division control protein 42 homolog                                                    | CDC42              | 86996000  | 118640000 | 1,33 | 0,99 | -0,01 | 7,6652 | -0,01438418  | -0,00566505  | -0,1084098   | -0,0292052   | -0,1757942   | -0,001760647 | 0,10319189   | 0,0264664    | 0,07860982   | 0,044644     | -0,0507116  | 7,50E-01     | 0,12        | 0,011016547  |              |
| Radiol                                                                                      | RPN3               | 116330000 | 141730000 | 1,11 | 0,99 | -0,01 | 8,8847 | -0,1392158   | -0,03670348  | -0,1463396   | 0,02048441   | 0,003314423  | 0,02995627   | 0,157406     | -0,2533261   | -0,02799853  | 5,57E-02     | 0,00        | 0,02799853   | 0,00        | 0,001720511  |              |
| Ras-related protein Rap-1B                                                                  | RAP1B              | 352270000 | 470480000 | 1,38 | 0,99 | -0,01 | 10,808 | -0,02086026  | -0,0098114   | -0,00000000  | -0,00000000  | -0,00000000  | -0,00000000  | -0,00000000  | -0,00000000  | -0,00000000  | -0,00000000  | -0,00000000 | -0,00000000  | 2,34E-02    | 0,00         | 0,00000000   |
| Copine 3                                                                                    | COP3               | 180210000 | 247000000 | 1,34 | 0,99 | -0,01 | 16,105 | -0,1208118   | 0,07560106   | 0,1004395    | 0,1216786    | 0,1285573    | -0,039557    | NaN          | NaN          | 0,009060428  | -0,2305837   | 9,57E-01    | 0,01         | 0,001371698 |              |              |
| Protein disulfide-isomerase A3                                                              | PDI3A3             | 115230000 | 148850000 | 1,23 | 0,99 | -0,01 | 18,957 | -0,1423215   | -0,003640216 | -0,01827883  | -0,000361786 | -0,05784214  | -0,1567558   | 0,1052758    | 0,144177     | NaN          | 0,01891905   | -0,01302846 | 6,80E-01     | 0,17        | 0,01265568   |              |
| Prothymosin alpha;Prothymosin alpha, N-terminally processed;Thymosin alpha-1                | PTMA               | 189820000 | 251787000 | 1,33 | 0,99 | -0,01 | 4,365  | -0,005362311 | -0,1475057   | -0,1946911   | -0,05452714  | 0,1128803    | 0,03843611   | -0,02304988  | -0,000837024 | -0,02161396  | 0,06598585   | -0,02357773 | 1,33E-01     | 0,88        | 0,016831584  |              |
| Citrate synthase, mitochondrial                                                             | CS                 | 109720000 | 136080000 | 1,31 | 0,99 | -0,01 | 7,4818 | -0,01482019  | 0,1009776    | 0,005902907  | -0,0204866   | -0,04218935  | -0,05121204  | -0,08499168  | -0,04055621  | -0,05214684  | -0,04325281  | -0,368014   | 1,89E-01     | 0,07        | 0,04941429   |              |
| Hsc70-interacting protein;Putative protein FAM104A;Putative protein FAM104S                 | ST13;ST13P4;ST13P5 | 515840000 | 689350000 | 1,28 | 0,99 | -0,01 | 10,555 | -0,02232225  | 0,114367     | -0,01356724  | -0,04619094  | -0,04629518  | -0,01362549  | -0,04473739  | 0,3827726    | -0,06984551  | NaN          | NaN         | 0,05862323   | 2,77E-01    | 0,56         | 0,045833718  |
| Dynamin alpha                                                                               | DNAF5              | 5485200   | 65987000  | 1,22 | 0,99 | -0,01 | 8,5777 | -0,1750937   | -0,02497152  | 0,08292979   | -0,1772454   | -0,2020739   | 0,1241958    | 0,2603871    | 0,07560106   | 0,03703076   | 0,2973675    | -0,05580126 | 6,76E-01     | 0,17        | 0,021971836  |              |
| Triangulin 2                                                                                | TG2L2              | 91541000  | 61230000  | 1,36 | 0,99 | -0,01 | 8,342  | -0,29602000  | -0,07263444  | -0,05168321  | -0,1371874   | 0,09155598   | 0,01450098   | 0,06819332   | 0,05395453   | 0,0218942    | 0,008392004  | -0,00000000 | 1,22E-01     | 0,00        | 0,00016484   |              |
| Ubiquitin-conjugating enzyme E2 D3;Ubiquitin-conjugating enzyme E2 D2                       | UBED23;UBED2       | 2465000   | 2963400   | 1,12 | 0,99 | -0,02 | 15,304 | 0,02460336   | 0,6072001    | 0,2266118    | 0,03857661   | -0,2249578   | NaN          | NaN          | NaN          | NaN          | 0,1306174    | 0,1887806   | 1,94E-01     | 0,71        | 0,140207447  |              |
| Proteasome subunit beta type-2                                                              | PSMB2              | 15285000  | 19681000  | 1,33 | 0,99 | -0,02 | 13,744 | -0,03925103  | 0,04997956   | -0,04400288  | -0,06766336  | -0,001472323 | -0,02820449  | -0,03911189  | -0,0592827   | -0,0843797   | -0,01412072  | NaN         | 0,1483484    | 2,00E-01    | 0,70         | 0,026885437  |
| Complement component 1,2;Subcomponent binding protein, mitochondrial                        | C10BP              | 183960000 | 234290000 | 1,17 | 0,99 | -0,02 | 8,7518 | -0,123654    | -0,02610219  | 0,0160683    | -0,02730736  | -0,04701051  | -0,1286893   | -0,05615872  | -0,0282486   | -0,01276644  | -0,04681677  | -0,04681677 | 2,54E-01     | 0,59        | 0,024413053  |              |
| Voltage-dependent anion-selective channel protein 2                                         | VDAC2              | 115410000 | 154880000 | 1,31 | 0,99 | -0,02 | 15,607 | 0,07313377   | 0,03745244   | 0,1486088    | 0,09207242   | 0,1004395    | -0,1300083   | -0,254909    | -0,1965558   | -0,2761357   | -0,2774641   | -0,3315505  | 1,59E-01     | 0,80        | 0,085229957  |              |
| Arginine-tRNA ligase, cytoplasmic                                                           | BAARS              | 469370000 | 583910000 | 1,16 | 0,99 | -0,02 | 13,972 | -0,1322616   | -0,07999641  | -0,06199282  | -0,09463365  | -0,01183524  | -0,07717078  | -0,007231562 | NaN          | NaN          | 0,03913844   | -0,00510176 | 1,32E-02     | 1,88        | -0,050814913 |              |
| Splicing factor 3B subunit 1                                                                | SF3B3              | 631870000 | 724930000 | 1,16 | 0,99 | -0,02 | 18,329 | -0,1735796   | -0,0769527   | -0,09058251  | -0,1368186   | -0,1584193   | 0,0451634    | 0,1036305    | 0,08129241   | 0,00991543   | 0,01720924   | -0,1971105  | 8,30E-01     | 0,05        | -0,004739608 |              |
| T-complex protein 1 subunit alpha                                                           | TCPI               | 341080000 | 442570000 | 1,29 | 0,99 | -0,02 | 7,813  | -0,03197566  | -0,0187156   | -0,02821316  | 0,01834928   | 0,021458703  | 0,03451487   | 0,03618086   | 0,02192761   | -0,009391595 | -0,02445494  | -0,13845    | 7,83E-01     | 0,11        | -0,00207391  |              |
| Glycylproline N-tetradecanoyltransferase 1                                                  | NMT1               | 15486000  | 202350000 | 1,13 | 0,99 | -0,02 | 13,714 | 0,006477609  | -0,3556494   | 0,04502354   | -0,147856    | -0,06907348  | -0,07748247  | 0,2811937    | 0,5930309    | NaN          | 0,2075181    | 0,2894804   | 3,06E-01     | 0,51        | 0,087320842  |              |
| Replication factor C subunit 3                                                              | RFC3               | 34710000  | 44758000  | 1,23 | 0,99 | -0,02 | 16,791 | NaN          | 0,02531228   | NaN          | 0,1885276    | NaN          | -0,04741292  | -0,2787411   | -0,2121741   | -0,1306031   | NaN          | NaN         | 1,68E-01     | 0,07        | 0,097460115  |              |
| Bilirubin reductase A                                                                       | BLVRA              | 248830000 | 295760000 | 1,18 | 0,99 | -0,02 | 4,7492 | -0,05208702  | -0,1447119   | -0,1456213   | -0,157069    | -0,005347897 | -0,0052658   | -0,2757767   | -0,2523977   | -0,2089578   | -0,1589608   | NaN         | NaN          | 8,12E-04    | 0,33         | 0,139986457  |
| Triangulin 2                                                                                | TG2L2              | 91541000  | 61230000  | 1,36 | 0,99 | -0,01 | 8,342  | -0,29602000  | -0,07263444  | -0,05168321  | -0,1371874   | 0,09155598   | 0,01450098   | 0,06819332   | 0,05395453   | 0,0218942    | 0,008392004  | -0,00000000 | 1,22E-01     | 0,00        | 0,00016484   |              |
| T-complex protein 1 subunit delta                                                           | CC24               | 298670000 | 391260000 | 1,35 | 0,99 | -0,02 | 6,2437 | -0,00513067  | -0,0160158   | -0,0752616   | -0,0773456   | -0,02277741  | -0,03701426  | -0,05644621  | -0,04138746  | -0,0731115   | -0,009060428 | -0,02849872 | -0,009001562 | 8,30E-01    | 0,00         | 0,009465227  |
| COP9 signalosome complex subunit 3                                                          | COP3               | 17136000  | 100509000 | 1,35 | 0,99 | -0,02 | 5,6773 | NaN          | 0,3329657    | 0,4352112    | 0,1939489    | -0,103564    | -0,0829555   | -0,08308712  | -0,1652407   | NaN          | NaN          | -0,00000000 | 4,34E-01     | 0,33        |              |              |



|                                                                                                             |          |           |           |      |      |       |        |              |              |             |             |              |              |              |             |              |              |              |             |             |              |              |
|-------------------------------------------------------------------------------------------------------------|----------|-----------|-----------|------|------|-------|--------|--------------|--------------|-------------|-------------|--------------|--------------|--------------|-------------|--------------|--------------|--------------|-------------|-------------|--------------|--------------|
| Chromodomain-helicase-DNA-binding protein 4                                                                 | CHD4     | 19321000  | 22448000  | 1.37 | 0.97 | -0.04 | 18,852 | NaN          | NaN          | 0.534958    | NaN         | -0.0407937   | 0.1423481    | 0.4070807    | NaN         | 0.01349801   | -0.05784214  | -0.3138177   | 0.1938348   | 2.9061      | 0.54         | 0.109908269  |
| CAD protein;Glutamine-dependent carbamoyl phosphate synthase;Aspartate carbamoyl transferase;Oxidoreductase | CAD      | 663960000 | 74820000  | 1.13 | 0.97 | -0.04 | 10,979 | 0.001513714  | -0.009408136 | -0.1784204  | -0.150036   | 0.00820003   | -0.00270626  | -0.1466818   | -0.1666844  | -0.4054146   | -0.001847847 | -0.05356861  | 0.04472732  | 6.68E-03    | 2.17         | 0.056059109  |
| Activator of 90 kDa heat shock protein ATPase homolog 1                                                     | AHSJA1   | 165370000 | 19426000  | 1.26 | 0.97 | -0.04 | 6,9275 | 0.05380643   | 0.01635366   | 0.02005774  | -0.1202315  | -0.04881533  | 0.03756839   | -0.116288    | -0.330408   | -0.147288    | -0.051584086 | -0.060640124 | 7.89E-02    | 2.10        | 0.0837861898 |              |
| Signal transducer and activator of transcription 5A                                                         | STAT5A   | 388680000 | 448828000 | 1.20 | 0.97 | -0.04 | 13,585 | 0.02219017   | 0.008343471  | -0.02535321 | -0.0379969  | -0.08089645  | -0.1637366   | -0.3738132   | -0.388241   | -0.276921    | -0.203668    | -0.3051822   | 3.53E-03    | 2.45        | 0.158348191  |              |
| S-phosphogluconatase                                                                                        | PGLS     | 171670000 | 235890000 | 1.39 | 0.97 | -0.04 | 10,587 | 0.07628538   | 0.00360565   | 0.007051912 | 0.004752986 | -0.05845792  | -0.0926033   | -0.118398    | 0.0538063   | -0.08340105  | -0.06398217  | 0.07066480   | 2.19E-01    | 0.66        | 0.025026155  |              |
| Splicing factor 1                                                                                           | SF1      | 40442000  | 17072000  | 1.42 | 0.97 | -0.05 | 27,664 | 0.00430402   | -0.1077878   | -0.0231974  | -0.1202125  | -0.04233902  | -0.12517407  | -0.1344005   | -0.2696625  | -0.1520078   | -0.1344005   | -0.112002773 | 1.68E-01    | 0.78        | 0.112002773  |              |
| Rac-related C1 betaulin toxin substrate 1                                                                   | RAC1     | 230940000 | 248390000 | 1.31 | 0.97 | -0.05 | 9,969  | 0.1284487    | -0.1006031   | -0.01518461 | -0.0176472  | 0.01035019   | -0.1353483   | -0.06904317  | -0.00291147 | 0.1183483    | -0.0761383   | 0.1514362    | 0.106101    | 6.55E-01    | 0.16610637   |              |
| Residue-19A ligase, cytoplasmic                                                                             | HARS     | 86553000  | 11071000  | 1.31 | 0.97 | -0.05 | 18,001 | 0.007195495  | 0.03745244   | 0.1428708   | -0.04568457 | -0.1720184   | 0.008486926  | NaN          | -0.1795063  | NaN          | NaN          | 0.07717031   | 1.355549    | 7.01E-01    | 0.15         | -0.051385452 |
| T-complex protein 1 subunit theta                                                                           | CTF8     | 517140000 | 665390000 | 1.23 | 0.97 | -0.05 | 7,6995 | -0.08228566  | -0.07155155  | -0.08016421 | -0.1154724  | -0.05957008  | -0.1221458   | -0.04355666  | -0.07872617 | NaN          | -0.05368267  | -0.05139919  | 1.94E-01    | 3.71        | 0.06732144   |              |
| Phosphorylserine/thioligine/cinnamidine synthase                                                            | PCAS     | 49840000  | 52537000  | 1.08 | 0.97 | -0.05 | 14,862 | -0.02287401  | -0.1039178   | -0.2099787  | -0.1036119  | -0.1309915   | -0.04128019  | -0.1711248   | -0.1005614  | -0.1126095   | -0.1281721   | -0.08130842  | -0.440126   | 9.52E-04    | 4.02         | 0.100803138  |
| Transcription elongation factor II polypeptide 2                                                            | TFIIH    | 13803000  | 626931000 | 1.20 | 0.97 | -0.05 | 11,813 | 0.0994814    | -0.0161837   | -0.0191817  | -0.0191817  | -0.0191817   | -0.0191817   | -0.0191817   | -0.0191817  | -0.0191817   | -0.0191817   | -0.0191817   | -0.0191817  | 0.101517    | 2.14E-01     | 0.03841911   |
| Mitochondrial import inner membrane translocase subunit TIM14                                               | DNAIC19  | 39134000  | 54754000  | 1.33 | 0.97 | -0.05 | 14,689 | -0.08169031  | 0.08065767   | NaN         | 0.08091968  | 0.1483484    | 0.169412     | -0.000606953 | 0.1285573   | 0.08814155   | NaN          | -0.04017048  | 0.05810868  | 3.58E-02    | 1.45         | 0.061371777  |
| General vesicular transport factor p115                                                                     | USO1     | 87771000  | 113175000 | 1.26 | 0.97 | -0.05 | 18,191 | 0.09288389   | 0.1978653    | 0.09653179  | 0.2253984   | 0.06322686   | -0.2479275   | -0.160379    | -0.1607176  | -0.0967766   | -0.2277765   | -0.1597665   | -0.3195496  | 7.69E-01    | 0.11         | -0.016760988 |
| Penicillin-binding repeat domain-containing protein 3, mitochondrial                                        | PTCD3    | 71490000  | 90685000  | 1.36 | 0.97 | -0.05 | 11,345 | NaN          | -0.09280171  | NaN         | 0.08038475  | NaN          | -0.03612646  | -0.160992    | 0.0474452   | 0.158854     | -0.1806588   | 0.1589595    | 0.927E-01   | 0.00        | 0.004563368  |              |
| Acyl-protein thioesterase 1                                                                                 | LYPLA1   | 13902000  | 17189000  | 1.29 | 0.96 | -0.05 | 7,4711 | -0.1106822   | -0.08814742  | 0.04334458  | -0.1069796  | -0.01206797  | -0.1668751   | 0.2327835    | -0.2363334  | NaN          | 0.0766959    | -0.03659984  | 2.66E-01    | 0.57        | 0.04559252   |              |
| L-lactate dehydrogenase B chain                                                                             | LDHB     | 207910000 | 274890000 | 1.31 | 0.96 | -0.05 | 6,1976 | -0.09343258  | -0.09294714  | -0.1628156  | -0.08031666 | -0.1144557   | -0.121332    | -0.07334775  | -0.1283456  | -0.04983016  | -0.09360196  | 1.97E-05     | 0.70        | 0.092775593 |              |              |
| Transducin beta-like protein 2                                                                              | TBL3     | 11440000  | 12757000  | 1.31 | 0.96 | -0.05 | 19,545 | NaN          | NaN          | NaN         | -0.80263    | -0.4959884   | -0.3538085   | 0.03506084   | -0.05935967 | -0.01835189  | -0.8677259   | NaN          | 4.19E-02    | 1.38        | -0.36535217  |              |
| Deoxyuridine 5'-triphosphate nucleotidohydrolase, mitochondrial                                             | DUT      | 15921000  | 22463000  | 1.39 | 0.96 | -0.05 | 13,566 | -0.07570242  | -0.05207204  | -0.1766093  | -0.1524169  | -0.1132079   | -0.1855726   | 0.2088917    | 0.04865466  | 0.1088924    | 0.04278438   | 0.0511463    | 8.45E-01    | 0.07        | 0.008001762  |              |
| Vacuolar protein sorting-associated protein 35                                                              | VP35     | 37961000  | 44727000  | 1.22 | 0.96 | -0.05 | 8,9093 | -0.111497    | -0.1813554   | -0.04174378 | -0.06577796 | -0.00389986  | -0.05404775  | -0.1230411   | -0.02404702 | -0.01364095  | -0.08785604  | 0.02048441   | 0.01074471  | 6.72E-03    | 2.17         | 0.049894004  |
| Heterogeneous nuclear ribonucleoprotein                                                                     | HNRPNH1  | 109999000 | 137290000 | 1.38 | 0.96 | -0.05 | 22,286 | -0.1322942   | -0.0621598   | -0.02149682 | -0.1852321  | -0.2510447   | -0.02137969  | -0.1579492   | -0.0275787  | -0.0275787   | -0.02676343  | 0.1844707    | 2.49E-01    | 0.60        | -0.075657317 |              |
| Heterogeneous nuclear ribonucleoprotein H, N-terminally processed                                           |          |           |           |      |      |       |        |              |              |             |             |              |              |              |             |              |              |              |             |             |              |              |
| Inosine 5-monophosphate dehydrogenase 2                                                                     | IMPDH2   | 96370000  | 128130000 | 1.22 | 0.96 | -0.05 | 8,995  | -0.01160256  | -0.08327878  | -0.06138308 | -0.1097945  | 0.001586012  | -0.02997102  | -0.1892196   | -0.1485608  | NaN          | NaN          | -0.1047749   | -0.07719323 | 1.96E-03    | 2.71         | 0.081599259  |
| Peptidyl-prolyl cis-trans isomerase FKBP4;Peptidyl-prolyl cis-trans isomerase FKBP4, N-terminally processed | FKBP4    | 110200000 | 13640000  | 1.23 | 0.96 | -0.05 | 14,592 | -0.03123383  | 0.002162436  | 0.04990488  | -0.0981667  | 0.01421241   | 0.01898031   | -0.1761365   | -0.1120693  | NaN          | NaN          | 0.08903711   | 0.04400288  | 9.78E-03    | 2.01         | 0.060319106  |
| Basic leucine zipper and W2 domain-containing protein 1                                                     | BZW1     | 61869000  | 8290300   | 1.29 | 0.96 | -0.05 | 18,205 | NaN          | NaN          | 0.04809668  | NaN         | -0.1313768   | NaN          | NaN          | NaN         | NaN          | NaN          | NaN          | NaN         | 2.40E-01    | 0.62         | -0.156084009 |
| Replication factor C subunit 2                                                                              | RFC2     | 67151000  | 8886700   | 1.28 | 0.96 | -0.05 | 3,1678 | 0.08637615   | 0.0244615    | 0.1629835   | -0.0734089  | -0.09312481  | -0.05686093  | -0.2404521   | -0.015573   | -0.03667348  | NaN          | NaN          | 6.09E-01    | 0.22        | -0.2135631   |              |
| Tubulin beta chain                                                                                          | TUBB     | 487730000 | 627690000 | 1.31 | 0.96 | -0.05 | 6,9593 | 0.07126965   | -0.1163948   | -0.1695661  | -0.05626221 | -0.1471524   | 0.03139513   | -0.08011914  | -0.1290852  | 0.108491     | 0.14007786   | 7.26E-01     | 0.14        | -0.0123482  |              |              |
| Mitochondrial import receptor subunit TOM40 homolog                                                         | TOMM40   | 244960000 | 29204000  | 1.32 | 0.96 | -0.05 | 11,975 | -0.0160298   | -0.008484517 | 0.1267086   | -0.1474788  | 0.01777946   | -0.3097528   | -0.2341758   | NaN         | -0.040455809 | NaN          | NaN          | NaN         | 3.98E-04    | 3.87         | 0.040455809  |
| Latentst staphylococcal nuclease                                                                            | LNS      | 36634000  | 38629000  | 1.08 | 0.96 | -0.06 | 20,254 | -0.232396    | -0.23239672  | -0.1645038  | NaN         | 0.03503084   | NaN          | 0.03503084   | NaN         | 0.03503084   | NaN          | NaN          | NaN         | 3.49E-01    | 0.46         | 0.03503084   |
| Heat shock protein HSP 90-alpha                                                                             | HSP90AA1 | 824030000 | 99630000  | 1.37 | 0.96 | -0.06 | 7,5676 | -0.085956    | -0.03137099  | -0.04230827 | -0.04701051 | -0.09118704  | -0.0628967   | -0.07705625  | -0.04572922 | -0.04832265  | -0.0377101   | 0.02573757   | 1.36E-01    | 3.80        | -0.051212451 |              |
| Puromycin-sensitive aminopeptidase                                                                          | PNPPPS   | 37666000  | 44036000  | 1.25 | 0.96 | -0.06 | 23,538 | -0.05821759  | -0.05797731  | -0.02181902 | 0.09044669  | -0.00592745  | -0.068602    | -0.05320044  | -0.0428912  | -0.0594467   | -0.05090587  | -0.02611994  | -0.05090587 | 2.56E-01    | 0.07         | -0.02611994  |
| Chloride intracellular channel protein 1                                                                    | CLIC1    | 280520000 | 379610000 | 1.29 | 0.96 | -0.06 | 9,392  | -0.1074147   | -0.09545036  | -0.09754815 | -0.06065305 | -0.119965    | -0.04790505  | -0.07051194  | -0.02696922 | -0.04587816  | -0.04348239  | -0.05844288  | 1.60E-04    | 3.80        | 0.0282544827 |              |
| 25S proteome regulatory subunit 6A                                                                          | PMAC3    | 32911000  | 41477000  | 1.22 | 0.96 | -0.06 | 11,446 | -0.07433474  | -0.07370968  | -0.09039159 | -0.09039159 | -0.00065325  | -0.0551152   | NaN          | -0.0204988  | -0.06245978  | 1.26E-02     | 1.90         | 0.06245978  |             |              |              |
| Transcription elongation factor II polypeptide 2                                                            | TFIIH    | 71151000  | 87161000  | 1.26 | 0.96 | -0.06 | 23,701 | -0.220626    | -0.1020316   | -0.1638321  | -0.1887262  | 0.1241248    | -0.05847296  | -0.104263    | -0.05703142 | -0.1252738   | -0.01693525  | -0.3456672   | -0.4453621  | 1.04E-01    | 0.98         | -0.098746638 |
| Elongation factor 1-delta                                                                                   | EF1D     | 34108000  | 38136000  | 1.20 | 0.96 | -0.06 | 14,305 | -0.072605218 | -0.2298931   | -0.02885196 | -0.1670065  | -0.188166    | -0.06686005  | -0.0279556   | -0.4285851  | -0.0909566   | -0.0982848   | 1.30E-02     | 1.89        | 0.024056021 |              |              |
| 39S ribosomal protein L22, mitochondrial                                                                    | MRPL22   | 28737000  | 32856000  | 1.29 | 0.96 | -0.06 | 18,395 | NaN          | -0.1501068   | -0.2186111  | NaN         | -0.3257744   | -0.4008155   | 0.1450014    | 0.5020624   | 0.7304009    | 1.194695     | 7.35E-01     | 0.13        | 0.059820645 |              |              |
| Phosphoglucomutase 2                                                                                        | PGM2     | 10311000  | 11252000  | 1.11 | 0.96 | -0.06 | 25,768 | -0.2336529   | -0.1251833   | -0.1251833  | 0.01421241  | -0.134956    | 0.0507087    | -0.06101425  | -0.1942618  | 0.1440464    | -0.09995826  | -0.05902898  | 6.31E-02    | 1.20        | 0.09886057   |              |
| Peptidyl-RNA hydrolase 2, mitochondrial                                                                     | PFH2     | 37346000  | 41361000  | 1.29 | 0.96 | -0.06 | 7,892  | -0.2244787   | NaN          | -0.06537031 | 0.06060078  | -0.0742169   | -0.09014243  | -0.01875566  | -0.1011648  | NaN          | NaN          | 3.68E-02     | 1.43        | 0.091820572 |              |              |
| Nucleic acid-containing protein 1                                                                           | NUCD1    | 23633000  | 31291000  | 1.22 | 0.96 | -0.06 | 18,461 | NaN          | -0.1973022   | 0.0938305   | NaN         | -0.0196083   | NaN          | 0.2639368    | NaN         | NaN          | 0.1373761    | 4.74E-01     | 0.32        | 0.063410781 |              |              |
| Signal recognition particle subunit SRP72                                                                   | SRP72    | 12614000  | 14702000  | 1.18 | 0.96 | -0.06 | 14,428 | -0.0683475   | 0.001874253  | -0.1393385  | -0.0804845  | -0.07552001  | -0.1231588   | -0.1067503   | -0.2848797  | -0.0107991   | -0.0561079   | 5.16E-01     | 0.29        | 0.042031363 |              |              |
| Ras-related protein Rab-S-C                                                                                 | RABSC    | 187480000 | 25147000  | 1.41 | 0.96 | -0.06 | 6,1631 | 0.0321009    | 0.08556063   | 0.1933407   | 0.000432815 | 0.05544473   | -0.000187559 | -0.1252527   | -0.1926451  | -0.09393824  | -0.04049687  | -0.5369635   | -0.1074899  | 2.24E-01    | 0.65         | 0.065656511  |
| Cullin-associated NEDD8-dissociated protein 1                                                               | CANL1    | 84877000  | 10355000  | 1.14 | 0.96 | -0.06 | 10,723 | -0.04670617  | -0.01680478  | -0.02062666 | -0.00302812 | -0.0337007   | -0.0274246   | -0.0307013   | -0.0257464  | -0.0208778   | -0.1668103   | 3.39E-03     | 2.44        | -0.01201534 |              |              |
| Cytochrome c oxidase subunit 5A, mitochondrial                                                              | COSA5    | 82626000  | 10355000  | 1.27 | 0.96 | -0.06 | 11,157 | -0.10762     | -0.0608012   | 0.01132551  | -0.0246036  | -0.000966931 | -0.1164105   | -0.02805736  | -0.0271111  | 0.04773987   | 0.05821264   | 1.08E-01     | 0.97        | -0.06060505 |              |              |
| UBX domain-containing protein 1                                                                             | UBXN1    | 67651000  | 75113000  | 1.09 | 0.96 | -0.06 | 10,405 | NaN          | -0.1896473   | NaN         | -0.04132808 | NaN          | -0.0409547   | -0.04086792  | NaN         | NaN          | NaN          | NaN          | 1.44E-01    | 0.84        | -0.16919952  |              |
| Leucocyte esterase inhibitor                                                                                | SERPINA1 | 39254600  | 44771000  | 1.12 | 0.96 | -0.06 | 13,466 | -0.2355152   | -0.09549666  | -0.03873226 | -0.01035019 | -0.06447989  | -0.01359632  | -0.1289133   | NaN         | 0.1764505    | -0.02785141  | NaN          | 2.44E-01    | 0.61        | -0.048240493 |              |
| DNA-dependent protein kinase catalytic subunit                                                              | PRKDC    | 356620000 | 400240000 | 1.15 | 0.96 | -0.06 | 11,604 | -0.03191658  | -0.07620429  | -0.06482494 | -0.0168997  | -0.03674785  | -0.03393937  | -0.1022      |             |              |              |              |             |             |              |              |

|                                                                                                                                                |               |           |           |      |      |       |        |              |             |              |              |             |             |             |             |              |             |             |             |              |              |              |              |   |
|------------------------------------------------------------------------------------------------------------------------------------------------|---------------|-----------|-----------|------|------|-------|--------|--------------|-------------|--------------|--------------|-------------|-------------|-------------|-------------|--------------|-------------|-------------|-------------|--------------|--------------|--------------|--------------|---|
| SRA stem-loop-interacting RNA-binding protein, mitochondrial                                                                                   | SLRP          | 99252000  | 122880000 | 1,21 | 0,94 | -0,09 | 5,6522 | -0,0316954   | 0,02304246  | -0,04965102  | -0,1157069   | -0,178763   | -0,08721215 | 0,01934605  | -0,1181474  | -0,003191915 | -0,1758106  | -0,06992124 | 0,07751644  | 2,70E-02     | 1,57         | -0,05918291  | *            |   |
| Acylaminic acid-releasing enzyme                                                                                                               | APH           | 105040000 | 125800000 | 1,25 | 0,94 | -0,09 | 17,403 | -0,1608789   | -0,3844143  | 0,196733     | -0,1733356   | -0,08489994 | 0,07888308  | -0,05476685 | -0,171472   | 0,1142337    | 0,02899946  | 0,1422174   | -0,1505451  | 3,12E-01     | 0,51         | -0,05159976  |              |   |
| COP9 signalosome complex subunit 8                                                                                                             | COP8          | 49322000  | 66630000  | 1,23 | 0,94 | -0,09 | 11,341 | -0,1876414   | -0,0760424  | -0,2109135   | -0,3065554   | -0,0466119  | -0,2579765  | 0,79693     | 0,1628546   | 0,10834928   | 0,22231     | 0,1685137   | 0,01834928  | 5,20E-01     | 0,28         | 0,062309524  |              |   |
| Serine/threonine-protein phosphatase 2B catalytic subunit alpha isoform;Serine/threonine-protein phosphatase 2B catalytic subunit beta isoform | PPP3CA,PPP3CB | 65102000  | 87555000  | 1,28 | 0,94 | -0,09 | 9,6215 | -0,1373261   | -0,0768038  | -0,192777    | 0,09855437   | -0,1449671  | NaN         | NaN         | NaN         | NaN          | NaN         | -0,3291235  | -0,2440015  | 2,51E-02     | 1,60         | -0,151906169 | *            |   |
| DnaJ homolog subfamily A member 2                                                                                                              | DNAJ2         | 43203000  | 48899000  | 1,32 | 0,94 | -0,09 | 15,468 | -0,466636    | -0,2496336  | NaN          | -0,252415    | NaN         | -0,3073764  | 0,05311137  | 0,1257833   | 0,02545406   | NaN         | NaN         | NaN         | 1,17E-01     | 0,93         | -0,0530173   |              |   |
| Vesicle-associated membrane protein 7                                                                                                          | VAMP7         | 42148000  | 27927000  | 1,28 | 0,94 | -0,09 | 12,896 | -0,1475696   | -0,03719188 | NaN          | -0,08411971  | -0,1128335  | -0,09069541 | NaN         | -0,161602   | -0,05232825  | -0,05823264 | NaN         | NaN         | 2,92E-04     | 3,53         | -0,02929366  | *            |   |
| Small nuclear ribonucleoprotein Sm D3                                                                                                          | SNRPD3        | 248210000 | 311370000 | 1,17 | 0,94 | -0,09 | 13,998 | -0,07599136  | -0,1107757  | 0,1500396    | 0,1569143    | -0,2443946  | -0,1837689  | -0,08462442 | 0,3700527   | 0,05185929   | 0,01410613  | 0,04382344  | 0,1603116   | 9,61E-01     | 0,02         | 0,002343423  |              |   |
| K-ras repair cross-complementing protein 5                                                                                                     | KRC5          | 110240000 | 142300000 | 1,09 | 0,94 | -0,09 | 14,115 | -0,2144578   | -0,1865574  | -0,0925555   | -0,2884865   | -0,1413147  | -0,2218153  | 0,1597583   | 0,1224906   | 0,3881105    | 0,1460035   | 0,1400783   | 0,721E-01   | 0,04         | 0,022794034  |              |              |   |
| NADH dehydrogenase [ubiquinone] 1 beta subcomplex subunit 6                                                                                    | NDUFB6        | 46897000  | 55089000  | 1,32 | 0,94 | -0,09 | 10,561 | NaN          | 0,0552468   | NaN          | -0,08586418  | 0,09017591  | 0,03413074  | NaN         | 0,08528864  | -0,0890371   | NaN         | NaN         | 6,77E-01    | 0,17         | -0,01480327  |              |              |   |
| Admine phosphoribosyltransferase                                                                                                               | APRT          | 57528000  | 71482000  | 1,32 | 0,94 | -0,09 | 9,7495 | -0,1671343   | -0,143549   | -0,1736447   | -0,1029031   | -0,1464554  | -0,1749797  | 0,03351105  | -0,0232111  | 0,009347181  | 0,09626186  | -0,01282465 | -0,05990899 | 5,22E-02     | 1,28         | -0,062377789 |              |   |
| Glutaredoxin-3                                                                                                                                 | GLRX3         | 564370000 | 704020000 | 1,26 | 0,94 | -0,09 | 9,1479 | -0,003871618 | 0,03337007  | 0,01353482   | -0,1614519   | -0,08727354 | -0,08234675 | -0,2373536  | -0,08632359 | -0,1627439   | -0,1147068  | 0,311326    | -0,1621536  | 2,68E-02     | 1,57         | -0,076551719 | *            |   |
| 35S ribosomal protein L34, mitochondrial                                                                                                       | MRPL14        | 23480000  | 27189000  | 1,14 | 0,94 | -0,09 | 2,1121 | -0,1180242   | -0,04770479 | -0,2158466   | -0,1424848   | -0,05232633 | 0,04215969  | NaN         | 0,04215969  | NaN          | 0,04215969  | NaN         | NaN         | 4,58E-03     | 2,34         | -0,11283373  |              |   |
| Heat shock protein HSP 90-beta                                                                                                                 | HSP90AB1      | 42961100  | 42961100  | 1,24 | 0,94 | -0,09 | 10,048 | -0,1526026   | -0,1427554  | -0,1682525   | -0,1383821   | -0,1480331  | -0,0792015  | -0,03089924 | -0,05169819 | -0,06781787  | -0,02419374 | -0,01006177 | 1,69E-04    | 3,77         | -0,010428682 | *            |              |   |
| Parafibromin                                                                                                                                   | CDC73         | 8462000   | 10040000  | 1,32 | 0,94 | -0,09 | 15,969 | -0,1773106   | -0,3074478  | NaN          | -0,1957797   | NaN         | 0,06842715  | 0,003458378 | NaN         | NaN          | 0,08447251  | NaN         | NaN         | 2,44E-01     | 0,61         | -0,087199681 |              |   |
| Importin subunit alpha-4                                                                                                                       | KPNAB         | 65133000  | 75836000  | 1,13 | 0,94 | -0,09 | 21,398 | -0,1808387   | -0,09252478 | -0,3712544   | -0,09451044  | -0,09090266 | -0,279669   | NaN         | 0,3146386   | NaN          | 0,1198209   | 0,1298765   | 0,147601    | 4,17E-01     | 0,63         | -0,061506011 |              |   |
| Core-binding factor subunit beta                                                                                                               | CBFb          | 21222000  | 26588000  | 1,12 | 0,94 | -0,09 | 12,37  | -0,2503937   | -0,2716005  | -0,2890514   | -0,3402033   | -0,2259519  | 0,1589833   | 0,1584035   | 0,0504668   | 0,05352838   | 0,02019986  | NaN         | NaN         | 9,55E-02     | 1,02         | -0,1089247   | *            |   |
| IroBabin                                                                                                                                       | PiB           | 111820000 | 127040000 | 1,25 | 0,94 | -0,09 | 7,975  | -0,02817503  | -0,1196201  | 0,06041236   | -0,1250221   | -0,12512476 | -0,1887756  | 0,08713503  | 0,00656466  | 0,06514385   | -0,1177248  | -0,07160703 | 1,92E-03    | 1,22         | -0,084747671 |              |              |   |
| GTP-binding protein SAR1b                                                                                                                      | SAR1B         | 4901700   | 6660400   | 1,24 | 0,94 | -0,10 | 2,1765 | NaN          | -0,0761783  | NaN          | -0,1441537   | NaN         | -0,03879162 | NaN         | 0,2676565   | -0,09686897  | -0,1359347  | -0,2223804  | 5,90E-01    | 0,23         | -0,035998939 |              |              |   |
| Lipopolysaccharide-responsive and beige-like anchor protein                                                                                    | LRBA          | 89852000  | 81525000  | 0,96 | 0,94 | -0,10 | 10,744 | -0,2252388   | -0,1283456  | -0,1517146   | -0,2036182   | -0,01495950 | -0,09321709 | NaN         | NaN         | NaN          | -0,1435003  | -0,1785183  | NaN         | NaN          | 5,08E-04     | 3,29         | -0,142404578 | * |
| Coxonin-7                                                                                                                                      | CORO7         | 6384500   | 7200000   | 1,07 | 0,94 | -0,10 | 5,8485 | -0,2038509   | -0,1248963  | -0,141446    | -0,0493076   | -0,05515651 | -0,09674571 | NaN         | NaN         | NaN          | -0,04479132 | -0,408078   | 1,34E-02    | 1,87         | -0,140057154 | *            |              |   |
| Cell cycle and apoptosis regulator protein 3                                                                                                   | CCAR2         | 43693000  | 47926000  | 1,07 | 0,93 | -0,10 | 10,597 | -0,1752077   | -0,08138476 | -0,1429427   | -0,1016446   | -0,1359823  | -0,0860019  | 0,1842168   | 0,02389408  | 0,03294719   | 0,3502709   | 0,1873877   | 0,5242643   | 4,64E-01     | 0,33         | -0,048318089 |              |   |
| ADP/ATP translocase 3,ADP/ATP translocase 3, N-terminally processed                                                                            | SLC5A6        | 13357800  | 14668000  | 1,08 | 0,93 | -0,10 | 8,2588 | -0,130397    | -0,2274048  | -0,162751    | -0,583806    | -0,09750187 | -0,0878702  | NaN         | NaN         | NaN          | -0,0990897  | -0,2321757  | 8,15E-04    | 3,09         | -0,1593118   | *            |              |   |
| Predixin subunit 5                                                                                                                             | PFONS         | 11597000  | 14387000  | 1,20 | 0,93 | -0,10 | 6,1187 | -0,05491674  | -0,02195085 | -0,06047253  | -0,005521651 | -0,04485093 | 0,08664525  | -0,2320875  | -0,1468187  | -0,0737277   | -0,1575602  | 0,08969718  | -0,1233196  | 3,79E-04     | 3,42         | -0,090715701 | *            |   |
| Tripeptidyl peptidase 2                                                                                                                        | TPP2          | 14897000  | 15123000  | 1,01 | 0,93 | -0,10 | 14,496 | -0,2590292   | -0,1570775  | -0,1260609   | -0,0015037   | -0,1966407  | 0,1094274   | 0,02389408  | -0,2186273  | -0,0408223   | 6,22E-02    | 1,261       | -0,11131677 | 1,22E-02     | 1,21         | -0,11131677  | *            |   |
| Small nuclear ribonucleoprotein-associated proteins B and B-small nuclear ribonucleoprotein-associated protein N                               | SNRBP,SNRPN   | 17786000  | 20835000  | 1,28 | 0,93 | -0,10 | 19,22  | -0,2392596   | -0,2357744  | -0,2860051   | -0,1084875   | -0,6668238  | -0,1756982  | 0,201132    | 0,243791    | 0,2853431    | 0,4614238   | 0,1526378   | 6,42E-01    | 0,19         | -0,046908862 |              |              |   |
| Complex II assembly factor LYRM7                                                                                                               | LYRM7         | 16227000  | 22920000  | 1,21 | 0,93 | -0,10 | 17,867 | -0,02234328  | -0,2532573  | NaN          | NaN          | NaN         | -0,07495759 | NaN         | NaN         | 0,271067     | 0,01249718  | NaN         | NaN         | 8,72E-01     | 0,06         | -0,011746542 |              |   |
| Splicing factor 3B subunit 5                                                                                                                   | SFBS          | 1441800   | 1635000   | 1,14 | 0,93 | -0,10 | 12,213 | -0,2627805   | -0,1449301  | NaN          | NaN          | -0,6297241  | -0,6398044  | NaN         | -0,08356924 | 0,04642113   | NaN         | NaN         | 6,66E-02    | 1,18         | -0,279064533 |              |              |   |
| Transformer-2 protein homolog beta                                                                                                             | TRAZB         | 3581400   | 4182100   | 0,97 | 0,93 | -0,10 | 20,201 | NaN          | -0,3818554  | -0,128213    | -0,1246131   | -0,984531   | -0,4130767  | NaN         | -0,1797434  | -0,04795711  | NaN         | NaN         | -0,2535524  | 7,90E-02     | 1,1          | -0,2535524   |              |   |
| Programmed cell death protein 5                                                                                                                | PDCD5         | 14973000  | 17800000  | 1,31 | 0,93 | -0,10 | 12,207 | -0,06190243  | -0,1224485  | -0,07807627  | -0,130555    | -0,06206814 | -0,01633686 | -0,1566914  | -0,1066223  | -0,229745    | -0,05920932 | -0,1283771  | -0,3003062  | 2,58E-04     | 3,59         | -0,121045662 | *            |   |
| Glucose-6-phosphate isomerase                                                                                                                  | GPI           | 203520000 | 242030000 | 1,15 | 0,93 | -0,10 | 10,667 | -0,1294949   | -0,2159034  | -0,08063569  | -0,09048033  | -0,1067391  | -0,00762157 | NaN         | NaN         | NaN          | 0,02351638  | 0,00863035  | 1,23E-02    | 1,91         | -0,07975628  |              |              |   |
| Signal peptidase complex subunit 2                                                                                                             | SPC2          | 5782800   | 8015300   | 1,36 | 0,93 | -0,11 | 20,459 | -0,1853391   | -0,1312097  | -0,1195554   | -0,2503552   | 0,01049345  | 0,05783146  | -0,485297   | -0,3563357  | -0,3465364   | -0,3637381  | -0,4349878  | -0,3616018  | 1,06E-01     | 0,97         | -0,149705358 |              |   |
| Transmembrane protein 33                                                                                                                       | TMEM33        | 8084400   | 10611300  | 1,35 | 0,93 | -0,11 | 15,151 | -0,1692837   | -0,1219882  | 0,007769512  | -0,1244606   | -0,01259181 | 0,02842765  | -0,302734   | -0,1333516  | -0,1609074   | -0,2283172  | -0,1683011  | 5,44E-02    | 1,26         | -0,099091156 |              |              |   |
| Riboflavin hydroxymethyltransferase                                                                                                            | NQD2          | 8485600   | 10383000  | 1,24 | 0,93 | -0,11 | 5,1267 | -0,1719371   | -0,1504491  | -0,1078218   | -0,1761528   | -0,04097178 | -0,1049922  | 0,1096949   | -0,0810138  | NaN          | -0,09850552 | 0,08909126  | NaN         | 1,85E-01     | 0,73         | -0,051743438 |              |   |
| Ubiquitin fusion degradation protein 1 homolog                                                                                                 | UFOL1         | 4241100   | 49109000  | 1,14 | 0,93 | -0,11 | 13,921 | -0,188266    | -0,01182941 | 0,09477648   | 0,005184378  | -0,1148017  | -0,04455326 | NaN         | -0,3390651  | -0,1898449   | NaN         | NaN         | 7,45E-02    | 1,13         | -0,114299935 |              |              |   |
| Dipeptidyl peptidase 3                                                                                                                         | DPP3          | 1981000   | 21812000  | 1,17 | 0,93 | -0,11 | 6,7189 | -0,001306507 | -0,10577992 | -0,07788145  | -0,02075023  | -0,04990488 | -0,04157155 | 0,06185152  | 0,09480152  | -0,00784803  | 0,08664794  | 5,86E-01    | 0,01        | 0,1205964    | 0,01         | -0,1205964   |              |   |
| EH domain-containing protein 1                                                                                                                 | EH01          | 9035600   | 11835000  | 1,19 | 0,93 | -0,11 | 12,851 | -0,02630426  | -0,1287557  | -0,04896435  | 0,04868024   | -0,2973424  | -0,173238   | NaN         | NaN         | NaN          | NaN         | 0,6676651   | -0,2658476  | 8,47E-01     | 0,07         | -0,021667294 |              |   |
| Mitochondrial import inner membrane translocase subunit TIM16                                                                                  | PAM16         | 17651000  | 22074000  | 1,16 | 0,93 | -0,11 | 7,7773 | -0,01429554  | -0,1134733  | -0,04262027  | NaN          | -0,08946688 | NaN         | NaN         | NaN         | NaN          | NaN         | -0,3374846  | 0,6635723   | 3,94E-01     | 0,03         | -0,011036823 |              |   |
| Expatrin-7                                                                                                                                     | XPT           | 9145300   | 10420000  | 1,19 | 0,93 | -0,11 | 15,586 | -0,3027778   | -0,1727894  | -0,05394294  | -0,2998067   | -0,01206797 | 0,08936255  | -0,2880295  | -0,3544008  | -0,3914557   | -0,2371325  | -0,184359   | -0,2105796  | 8,48E-04     | 3,07         | -0,195697638 | *            |   |
| Phosphoglycerate mutase 1                                                                                                                      | PGAM1         | 93938000  | 116620000 | 1,19 | 0,93 | -0,11 | 11,823 | -0,3525473   | -0,2348345  | -0,1853265   | -0,2749133   | -0,242722   | -0,0274552  | -0,0718995  | -0,1818995  | -0,0536674   | 0,04294245  | -0,1150332  | -0,07382025 | 6,56E-02     | 1,18         | -0,11607301  |              |   |
| 26S proteasome non-ATPase regulatory subunit 5                                                                                                 | PSMD5         | 47528000  | 54564000  | 1,19 | 0,93 | -0,11 | 8,2418 | -0,001039149 | -0,03621516 | -0,022392363 | 0,01506926   | 0,07661502  | NaN         | -0,4930122  | NaN         | -0,36952     | -0,2635076  | 5,26E-02    | 1,28        | -0,141262766 |              |              |              |   |
| Vesicular integral-membrane protein VP36                                                                                                       | LMAN2         | 4469800   | 6083100   | 1,21 | 0,93 | -0,11 | 11,36  | -0,1033949   | -0,1643687  | -0,1093276   | -0,02577904  | -0,07380319 | -0,1510127  | NaN         | -0,1490484  | 0,04465748   | -0,01905342 | NaN         | NaN         | 1,39E-01     | 0,86         | -0,049336628 |              |   |
| S-phase kinase-associated protein 1                                                                                                            | SKP1          | 6391000   | 8511100   | 1,31 | 0,93 | -0,11 | 9,8328 | -0,01193135  | 0,02587931  | -0,008476019 | -0,1211332   | -0,08408099 | -0,119995   | -0,2254301  | -0,1776369  | -0,08874998  | 0,007053912 | -0,174826   | -0,06215845 | 3,98E-03     | 2,40         | -0,105554397 | *            |   |
| Secine-rich kinase kinase receptor-associated protein                                                                                          | STRAP         | 3940000   | 46213000  | 1,23 | 0,93 | -0,11 | 9,512  | -0,1708162   | -0,2474702  | -0,07786207  | -0,2835862   | -0,2775242  | -0,1380446  | NaN         | -0,09389441 | -0,09592515  | -0,075782   | 7,22E-04    | 3,14        | -0,15048081  |              |              |              |   |
| Thioredoxin domain-containing protein 12                                                                                                       | TXNDC12       | 3143700   | 3738800   | 1,26 | 0,93 | -0,11 | 6,6314 | NaN          | -0,121722   | NaN          | -0,1290533   | -0,0354881  | -0,1394     |             |             |              |             |             |             |              |              |              |              |   |

|                                                                                                                                            |          |           |          |      |      |       |        |             |             |             |             |             |              |             |             |            |             |              |              |         |              |              |   |
|--------------------------------------------------------------------------------------------------------------------------------------------|----------|-----------|----------|------|------|-------|--------|-------------|-------------|-------------|-------------|-------------|--------------|-------------|-------------|------------|-------------|--------------|--------------|---------|--------------|--------------|---|
| acidic leucine-rich nuclear phosphoprotein 32 family member E                                                                              | ANP32E   | 52369000  | 68560000 | 1.15 | 0.90 | -0.10 | 6.71   | -0.2091779  | -0.05008417 | -0.00187691 | -0.1607499  | -0.08811671 | -0.002469117 | 0.2596603   | 0.6016966   | -0.2199252 | -0.3493457  | NAN          | -0.2074611   | 6.66601 | 0.18         | -0.036077242 | * |
| Small nuclear ribonucleoprotein F                                                                                                          | SNRPF    | 26973000  | 36474000 | 1.57 | 0.90 | -0.15 | 7.1809 | -0.5477683  | -0.353782   | NAN         | NAN         | -0.4054323  | -0.4067333   | -0.07999693 | 0.05238319  | -0.1088452 | -0.06743983 | -0.0871356   | -0.2217747   | 5.57603 | 0.25         | -0.222516878 | + |
| RNA-binding protein 14                                                                                                                     | RBM14    | 50054000  | 44880000 | 1.49 | 0.90 | -0.15 | 24.849 | -0.4370762  | NAN         | -0.511954   | -0.142626   | -0.5930321  | NAN          | -0.0728836  | -0.218919   | 0.0792028  | 0.469156    | -0.339349    | -0.237749    | 5.55641 | 0.45         | -0.037180874 | + |
| Protein 120                                                                                                                                | MEOS1    | 92559000  | 22118000 | 1.20 | 0.80 | -0.15 | 14.617 | -0.211381   | -0.328402   | -0.183508   | -0.414861   | -0.222386   | NAN          | NAN         | -0.18052    | 0.261713   | NAN         | NAN          | NAN          | 6.52602 | 1.19         | -0.14570097  | + |
| Isosulfoxide-oxidoreductase domain-containing protein 1                                                                                    | ISOC1    | 17177000  | 8939000  | 1.08 | 0.90 | -0.15 | 14.675 | -0.386953   | 0.02119536  | -0.1625411  | -0.287948   | -0.132106   | -0.241089    | 0.108491    | -0.05761887 | -0.1183597 | -0.0569965  | -0.004378005 | -0.1758121   | 2.45501 | 0.61         | -0.05718198  | + |
| 60S ribosomal protein L37a                                                                                                                 | RPL37A   | 85324000  | 92939000 | 1.58 | 0.90 | -0.15 | 14.876 | -0.9749429  | -0.0112343  | -0.706865   | -0.669082   | -0.924021   | -0.843965    | -0.202473   | -0.0919555  | -0.180544  | -0.1556947  | -0.1090631   | -0.1346829   | 7.97904 | 3.10         | -0.04918092  | + |
| ELAV-like protein 1                                                                                                                        | ELAVL1   | 15339000  | 17797000 | 1.55 | 0.90 | -0.15 | 25.996 | -0.7485067  | -0.786645   | -0.261759   | -0.173611   | -0.643630   | -0.7703383   | -0.1300377  | 0.1751732   | 0.0562085  | -0.1668265  | -0.1278974   | -0.1038599   | 3.55602 | 1.45         | -0.26088465  | + |
| Transmembrane domain-containing protein 4-beta                                                                                             | TMD4B    | 14673000  | 15746000 | 1.00 | 0.90 | -0.15 | 14.728 | -0.47213    | -0.23144    | -0.12314    | -0.12314    | -0.12314    | -0.12314     | -0.12314    | -0.12314    | -0.12314   | -0.12314    | -0.12314     | -0.12314     | 1.581   | 0.77         | -0.06314096  | + |
| Pre-mRNA-splicing factor SF27                                                                                                              | KLAVS1   | 38805000  | 48037000 | 1.44 | 0.90 | -0.15 | 13.684 | -0.4450642  | NAN         | 0.01106999  | -0.6690975  | -0.457367   | -0.0111184   | -0.1547901  | -0.1267698  | -0.0990387 | -0.07462311 | -0.1359664   | -0.713102    | 7.31102 | 2.14         | -0.26870393  | + |
| Trafficking protein particle complex subunit 3                                                                                             | TPP3C3   | 36640000  | 43192000 | 1.03 | 0.90 | -0.15 | 23.106 | -0.109959   | -0.07857888 | 0.06032421  | 0.02419621  | 0.00102999  | NAN          | NAN         | 0.358232    | -0.5175027 | -0.736771   | NAN          | NAN          | 7.70002 | 1.51         | -0.21653789  | + |
| Protein/threonine-protein phosphatase PP1- $\alpha$ catalytic subunit                                                                      | PPP1CA   | 261397000 | 34424000 | 1.20 | 0.90 | -0.15 | 17.106 | -0.1577779  | -0.03187236 | 0.03071168  | -0.1525002  | -0.1779229  | -0.1248176   | -0.1704426  | -0.2148596  | -0.1972691 | -0.1576728  | -0.1889515   | -0.254605    | 4.59    | 0.9          | -0.14613787  | + |
| Nucleolus pore complex protein Nup160                                                                                                      | NUP160   | 72596000  | 83697000 | 1.00 | 0.90 | -0.15 | 7.962  | -0.3625288  | -0.2764327  | 0.07313477  | 0.0854661   | -0.5668673  | -0.3758336   | -0.1210785  | -0.2060126  | -0.1542491 | -0.011588   | -0.1531738   | -0.0624055   | 8.87763 | 2.05         | -0.177782795 | + |
| WD40 repeat-containing protein SMU1; WD40 repeat-containing protein SMU1; N-terminally processed                                           | SMU1     | 14124000  | 15555000 | 1.42 | 0.90 | -0.16 | 5.962  | NAN         | NAN         | NAN         | NAN         | -0.424223   | NAN          | -0.05547139 | NAN         | NAN        | -0.04205566 | -0.2066617   | -0.71002     | 1.15    | 0.1          | -0.170554468 | + |
| Serine/threonine-protein phosphatase 1                                                                                                     | SRPE     | 80929000  | 11660000 | 0.95 | 0.90 | -0.16 | 27.101 | -0.4306062  | -0.4213723  | -0.4064235  | -0.1225541  | -0.118978   | NAN          | NAN         | 0.1213994   | 0.6125885  | NAN         | -0.0706408   | -0.1360601   | 3.21601 | 0.49         | -0.180027141 | + |
| Protein 470800                                                                                                                             | PTG53    | 43037000  | 56708000 | 1.32 | 0.90 | -0.16 | 14.405 | -0.3119424  | -0.240411   | -0.209911   | -0.153706   | -0.08036248 | -0.124898    | -0.168212   | -0.1711897  | -0.1986592 | -0.149612   | -0.171807    | -0.173804    | 1.641   | 0.7          | -0.0373804   | + |
| Epoxide-glycyl cys trans isomerase FKBP8                                                                                                   | FKBP8    | 60503000  | 6584100  | 1.21 | 0.90 | -0.16 | 15.273 | -0.0558122  | -0.242558   | -0.138863   | -0.363886   | -0.40270937 | -0.339191    | NAN         | NAN         | -0.2397194 | -0.1417484  | -0.255603    | -0.1937504   | 2.55603 | 0.59         | -0.195100095 | + |
| Pexidine domain-containing complex RRP42                                                                                                   | EXOC7    | 80874000  | 10581000 | 1.08 | 0.80 | -0.16 | 7.459  | -0.1601694  | -0.167101   | NAN         | -0.2702602  | NAN         | -0.0762499   | -0.2557528  | -0.1893513  | NAN        | -0.1055619  | -0.04324446  | -0.155602    | 1.81    | 0.205        | -0.165862    | + |
| Serine/threonine-protein kinase PAK 2/PAK-2p27/PAK-2p34                                                                                    | PAK2     | 248220000 | 27107000 | 1.22 | 0.89 | -0.16 | 14.374 | -0.352453   | -0.1269771  | -0.292422   | -0.3078406  | -0.276214   | -0.1001129   | NAN         | NAN         | -0.205516  | -0.1055816  | -0.04324446  | -0.155602    | 1.81    | 0.205        | -0.165862    | + |
| Heat shock protein 105 kDa                                                                                                                 | HSPH1    | 603790000 | 65681000 | 1.19 | 0.89 | -0.16 | 14.047 | -0.111341   | -0.07052711 | -0.2387147  | -0.1688848  | -0.1238734  | -0.1106827   | -0.1931398  | -0.1462598  | -0.1871158 | -0.1258972  | -0.138521    | -0.234607    | 6.63    | 2.63         | -0.045737649 | + |
| GMP synthase [glutamine-hydrolyzing]                                                                                                       | GMPS     | 67773000  | 74921000 | 0.99 | 0.89 | -0.16 | 27.265 | -0.1968225  | -0.1978978  | -0.1334639  | -0.1488966  | -0.1035499  | -0.1289765   | -0.256309   | -0.3104504  | -0.3209186 | -0.3453995  | -0.269947    | -0.2939779   | 1.60606 | 0.80         | -0.225240251 | + |
| Vacuolar protein sorting-associated protein 26A                                                                                            | VP26A    | 56528000  | 71650000 | 1.27 | 0.89 | -0.16 | 9.7561 | NAN         | 0.01920368  | NAN         | -0.06816573 | -0.5583252  | NAN          | -0.1181162  | -0.1578176  | NAN        | -0.3453995  | -0.269947    | -0.2939779   | 1.60606 | 0.80         | -0.225240251 | + |
| Mitochondrial inner receptor subunit TOM2 homolog                                                                                          | TMOM2    | 12716000  | 14884000 | 1.31 | 0.89 | -0.16 | 4.565  | -0.1147537  | -0.1851461  | -0.3546304  | -0.202675   | -0.2900213  | -0.1847853   | 0.003746074 | -0.1866887  | -0.0510381 | 0.08392422  | 0.07724293   | -0.1459245   | 5.81604 | 3.24         | -0.12926743  | + |
| Quinone oxidoreductase                                                                                                                     | KMOZ     | 5894000   | 73994000 | 1.41 | 0.89 | -0.17 | 26.527 | -0.1746539  | -0.3339981  | -0.0806427  | -0.3207023  | -0.1308993  | -0.0229619   | -0.3017638  | NAN         | -0.147848  | -0.1359888  | -0.1800714   | -0.000346329 | 7.28006 | 2.13         | -0.15336248  | + |
| Iron-sulfur protein 1                                                                                                                      | PIR1     | 10321000  | 72992000 | 1.12 | 0.89 | -0.17 | 12.101 | -0.108205   | -0.12314    | -0.12314    | -0.12314    | -0.12314    | -0.12314     | -0.12314    | -0.12314    | -0.12314   | -0.12314    | -0.12314     | -0.12314     | 1.581   | 0.77         | -0.06314096  | + |
| Thioredoxin domain-containing protein 5                                                                                                    | TXNOX5   | 68337000  | 8545100  | 1.25 | 0.89 | -0.17 | 5.537  | -0.1873621  | -0.03051607 | -0.3567349  | -0.267722   | -0.1906185  | NAN          | NAN         | NAN         | NAN        | -0.1384099  | -0.0663055   | -0.0966305   | 5.97603 | 2.22         | -0.17687154  | + |
| Latent $\alpha$ 1-aphelactone dehydratase                                                                                                  | CYP51A1  | 10103000  | 94677000 | 1.13 | 0.89 | -0.17 | 13.113 | -0.2545475  | -0.3787757  | -0.188973   | -0.07112893 | -0.1285506  | NAN          | NAN         | NAN         | NAN        | -0.0407937  | -0.09574815  | -0.50306     | 2.30    | 1.94         | -0.19456786  | + |
| NAGS                                                                                                                                       | NAGS     | 90238000  | 10338000 | 1.16 | 0.89 | -0.17 | 13.355 | -0.2163003  | -0.1760713  | -0.4268582  | -0.2482107  | -0.2752799  | -0.2450441   | -0.1350473  | -0.1666808  | -0.1462598 | 0.02913487  | NAN          | -0.08278566  | 2.99604 | 3.52         | -0.18990286  | + |
| Protein arginine N-methyltransferase domain-containing protein 1                                                                           | PRMT5    | 244150000 | 26756000 | 1.08 | 0.90 | -0.17 | 23.106 | -0.1577779  | -0.03187236 | 0.03071168  | -0.1525002  | -0.1779229  | -0.1248176   | -0.1704426  | -0.2148596  | -0.1972691 | -0.1576728  | -0.1889515   | -0.254605    | 4.59    | 0.9          | -0.14613787  | + |
| ADP-ATP translocase 2/ADP/ATP translocase 2, N-terminally processed                                                                        | SLC25A5  | 161380000 | 18584000 | 1.14 | 0.89 | -0.17 | 7.3931 | -0.314582   | -0.325684   | -0.200971   | -0.151491   | -0.3714087  | -0.3010803   | -0.1370131  | -0.1440581  | -0.1739493 | -0.08225866 | -0.1028951   | -0.13805     | 1.38    | 0.65         | -0.196559273 | + |
| 28 kDa heat- and acid-stable phosphatase                                                                                                   | PDAP1    | 21965000  | 21145000 | 1.12 | 0.89 | -0.17 | 10.022 | -0.1926451  | -0.1654667  | -0.0716638  | -0.08795703 | -0.1197142  | -0.2681217   | -0.2382552  | NAN         | NAN        | NAN         | 0.02147971   | NAN          | 4.54603 | 2.36         | -0.193170247 | + |
| Small nuclear ribonucleoprotein Sm D2                                                                                                      | SNRPD2   | 22565000  | 28432000 | 1.12 | 0.89 | -0.17 | 18.85  | -0.3192796  | -0.2841944  | -0.2338067  | -0.212333   | -0.4267612  | -0.3706387   | -0.2172728  | -0.1560162  | -0.1375367 | -0.1515345  | -0.1461151   | -0.42806     | 5.37    | 2.63         | -0.04234797  | + |
| Vacuolar protein sorting-associated protein 29                                                                                             | VP29     | 5326000   | 6959000  | 1.27 | 0.89 | -0.16 | 9.7561 | -0.1968225  | -0.1978978  | -0.1334639  | -0.1488966  | -0.1035499  | -0.1289765   | -0.256309   | -0.3104504  | -0.3209186 | -0.3453995  | -0.269947    | -0.2939779   | 1.60606 | 0.80         | -0.225240251 | + |
| Cilia- and flagella-associated protein 20                                                                                                  | CFAP20   | 38326000  | 4537900  | 1.16 | 0.89 | -0.17 | 11.855 | -0.2329993  | -0.1739539  | -0.1767724  | -0.20558    | -0.3303564  | -0.3283086   | NAN         | NAN         | 0.0672574  | -0.04351208 | NAN          | -0.0991765   | 4.25603 | 2.36         | -0.16889962  | + |
| Galectin-1                                                                                                                                 | LGALS1   | 101624000 | 11252000 | 1.11 | 0.89 | -0.18 | 4.6978 | -0.1798251  | -0.07099216 | -0.1353958  | -0.06984551 | -0.08095164 | -0.0115127   | -0.10115    | -0.5168833  | -0.5593637 | -0.3601381  | -0.5995496   | -0.2750006   | 3.84403 | 2.46         | -0.32476205  | + |
| Guanine nucleotide-binding protein (G)/G15/G17 subunit beta-2                                                                              | GNE2     | 28952000  | 32582000 | 1.02 | 0.89 | -0.18 | 7.4944 | -0.159557   | -0.1761365  | -0.3793948  | -0.2629882  | -0.01728567 | -0.01646819  | NAN         | NAN         | -0.4789895 | -0.4087611  | NAN          | -0.237447607 | 2.19    | 0.9          | -0.14613787  | + |
| Nardilysin                                                                                                                                 | NRD1     | 16932000  | 17862000 | 1.02 | 0.88 | -0.18 | 13.456 | -0.2183465  | -0.1605079  | -0.1078655  | -0.1076479  | -0.2262343  | -0.2051878   | -0.2631861  | -0.0203842  | NAN        | -0.3106114  | -0.4330778   | -0.2248347   | 1.02604 | 3.99         | -0.20676313  | + |
| Matrix-3                                                                                                                                   | MATR3    | 49573000  | 57482000 | 1.05 | 0.88 | -0.18 | 12.884 | -0.4867317  | -0.2510922  | -0.010454   | -0.1460808  | -0.6285192  | -0.5851006   | -0.0167816  | -0.02672926 | -0.0784466 | -0.1158324  | -0.1415097   | -0.1717909   | 7.3102  | 1.14         | -0.1573755   | + |
| Dipeptidyl peptidase 1-Dipeptidyl peptidase 1 exclusion domain chain-Dipeptidyl peptidase 1 heavy chain-Dipeptidyl peptidase 1 light chain | CTSC     | 34377000  | 3550100  | 1.13 | 0.88 | -0.18 | 10.255 | -0.2655334  | -0.2361975  | -0.5630707  | -0.4753346  | -0.2962698  | NAN          | NAN         | -0.07500324 | NAN        | NAN         | -0.1995204   | 3.01603      | 2.19    | -0.031565516 | +            |   |
| L-aminoadipate semialdehyde dehydrogenase-phosphatethylesterase transferase                                                                | AASDHPP1 | 20258000  | 22627000 | 1.01 | 0.88 | -0.18 | 18.853 | -0.2324469  | -0.2562806  | -0.0183957  | -0.1207804  | -0.0678935  | NAN          | -0.2736222  | -0.4360414  | -0.2539797 | -0.2948979  | NAN          | -0.1214551   | 5.12604 | 3.29         | -0.20777886  | + |
| Pyridylmethylate trans-binding protein 1                                                                                                   | FTBP1    | 190520000 | 21750000 | 1.05 | 0.88 | -0.19 | 17.289 | -0.3241298  | -0.3411533  | -0.189831   | -0.2024557  | -0.3256937  | -0.3050224   | -0.229884   | -0.36123    | -0.452522  | -0.0451634  | -0.0439044   | -0.448061    | 4.48601 | 0.35         | -0.05738109  | + |
| Inoprotein-5                                                                                                                               | IPO5     | 59822000  | 60448000 | 1.02 | 0.80 | -0.19 | 9.7876 | -0.1585098  | -0.0835232  | -0.2627632  | -0.2002827  | -0.2202105  | -0.3437508   | -0.2297477  | -0.1494086  | -0.2520327 | -0.3085019  | -0.4483708   | -0.49700     | 3.30    | 0.24278945   | +            |   |
| 60 kDa SS-A/Ro ribonucleoprotein                                                                                                           | TROVE2   | 21122000  | 2045000  | 1.02 | 0.89 | -0.19 | 8.918  | -0.1598469  | -0.254427   | -0.1680255  | -0.1879372  | -0.01017798 | -0.1828188   | NAN         | NAN         | -0.2054302 | -0.3702471  | -0.90760     | 3.00         | 0.9     | -0.19233683  | +            |   |
| Mitochondrial inner receptor subunit alpha                                                                                                 | TMOM2    | 11712000  | 13485000 | 1.11 | 0.88 | -0.19 | 13.219 | -0.04080856 | -0.02759307 | -0.07111041 | -0.04689211 | -0.05270098 | -0.2460401   | NAN         | NAN         | -0.2119517 | -0.0876479  | -0.41502     | 1.99         | 0.9     | -0.084996476 | +            |   |
| Clamp H66                                                                                                                                  | C14orf66 | 11023000  | 11997000 | 1.08 | 0.88 | -0.19 | 11.359 | -0.3896923  |             |             |             |             |              |             |             |            |             |              |              |         |              |              |   |

|                                                                                                                                  |                 |           |           |      |      |       |        |             |            |              |             |               |            |             |              |             |             |             |              |              |              |              |   |
|----------------------------------------------------------------------------------------------------------------------------------|-----------------|-----------|-----------|------|------|-------|--------|-------------|------------|--------------|-------------|---------------|------------|-------------|--------------|-------------|-------------|-------------|--------------|--------------|--------------|--------------|---|
| Prefoldin subunit 3                                                                                                              | VBP1            | 49577000  | 63150000  | 1.16 | 0.86 | -0.22 | 12.188 | -0.0730053  | -0.301497  | 0.01035019   | -0.2108801  | -0.04186257   | -0.1141602 | -0.08298838 | -0.09472612  | -0.1676852  | -0.8666469  | 0.00044286  | 0.02984157   | 4.3162       | 1.37         | -0.159845016 |   |
| tRNA (cytosine34-C55)-methyltransferase                                                                                          | NSX1            | 272010000 | 301750000 | 1.09 | 0.86 | -0.22 | 13.966 | -0.2148596  | -0.242832  | -0.1817057   | -0.2661598  | -0.1391087    | -0.2070783 | -0.03501742 | -0.1098907   | -0.1114416  | -0.139204   | -0.2419527  | -0.1033809   | 3.0406       | 5.52         | -0.189413138 | + |
| Yonin 1/214E ligase                                                                                                              | YON1            | 119220000 | 117350000 | 0.83 | 0.85 | -0.23 | 15.922 | -0.2920018  | -0.2620727 | -0.2312071   | -0.2070174  | -0.2037174    | -0.2127426 | -0.0207174  | -0.0307174   | -0.0765684  | -0.0765684  | 0.00915179  | 0.0765684    | 2.127        | 6.03         | -0.269154009 | + |
| Cytochrome c oxidase subunit 4 isoform 1, mitochondrial                                                                          | COX1            | 168310000 | 195800000 | 1.15 | 0.86 | -0.22 | 22.860 | -0.2026218  | -0.1377113 | -0.1623473   | -0.2118155  | -0.1225608    | -0.1677175 | -0.2172001  | -0.2582526   | -0.2499252  | -0.2060066  | -0.2861635  | -0.2877522   | 3.0208       | 7.28         | -0.215724021 | + |
| Histone deacetylase 2                                                                                                            | HDAC2           | 90748000  | 120380000 | 1.30 | 0.86 | -0.23 | 21.745 | -0.3550163  | -0.1645818 | -0.1020534   | NaN         | 0.01292609    | -0.2845634 | NaN         | -0.2129187   | -0.2589409  | -0.0823167  | -0.2845634  | 8.9861       | 0.00         | 0.001117435  | +            |   |
| AP-2 complex subunit beta                                                                                                        | APB1            | 197580000 | 215910000 | 1.06 | 0.85 | -0.23 | 16.559 | -0.4424184  | -0.2758562 | -0.1759572   | -0.1102461  | -0.1283771    | -0.5781762 | -0.03289039 | -0.105291    | -0.1514742  | -0.04340035 | -0.1906185  | -0.0433024   | 3.5663       | 2.45         | -0.196295052 | + |
| N-terminal Xaa-Pro-Lys-N-methyltransferase 1; N-terminal Xaa-Pro-Lys-N-methyltransferase 1, N-terminally processed               | NTM1            | 82017000  | 93865000  | 1.19 | 0.85 | -0.23 | 7.6293 | -0.1685552  | -0.2551156 | -0.08623166  | -0.1542811  | -0.0007211562 | -0.1806261 | -0.2965426  | -0.5057116   | -0.4407529  | -0.4394807  | -0.6324053  | -0.5186183   | 2.5664       | 3.59         | -0.311363926 | + |
| NHP2-like protein 1; NHP2-like protein 1, N-terminally processed                                                                 | NHP2L1          | 56704000  | 72520000  | 1.03 | 0.85 | -0.23 | 16.755 | -0.338141   | -0.3098601 | -0.005970677 | -0.1188836  | -0.4338571    | -0.3415737 | -0.332197   | -0.3192711   | 0.2144979   | 0.4773665   | 0.03463829  | 0.1368475    | 9.6961       | 0.01         | -0.003538992 | + |
| Small nuclear ribonucleoprotein E                                                                                                | SNRPE           | 251300000 | 316960000 | 1.25 | 0.85 | -0.23 | 7.7097 | -0.2589802  | -0.3232074 | NaN          | -0.4191213  | NaN           | -0.1559951 | -0.2581347  | -0.1228705   | -0.2387805  | -0.1348623  | -0.1348623  | 1.9805       | 4.70         | -0.232647116 | +            |   |
| Nucleophosmin                                                                                                                    | NPM1            | 227320000 | 205380000 | 1.37 | 0.85 | -0.23 | 25.292 | -0.8599343  | -0.2707069 | -0.4118479   | -0.5974088  | -0.746035     | -0.8475158 | 0.007482617 | -0.1548424   | 0.03731201  | -0.1158789  | 0.2801249   | 0.3252713    | 4.8202       | 1.32         | -0.291193053 | + |
| Grp protein homolog 1, mitochondrial                                                                                             | GRPQL1          | 126000000 | 144350000 | 1.12 | 0.85 | -0.23 | 10.987 | -0.3325529  | -0.256039  | -0.1556034   | -0.2706483  | -0.2706483    | -0.3502098 | -0.1010354  | -0.02607286  | NaN         | NaN         | 0.06024684  | -0.03634831  | 2.4263       | 2.62         | -0.171754851 | + |
| Methionine aminopeptidase 2                                                                                                      | MEP2AP          | 48674000  | 50422000  | 1.31 | 0.85 | -0.23 | 22.861 | -0.7146333  | -0.6224475 | -0.6530374   | NaN         | 0.9432222     | -0.8641237 | -0.1095143  | 0.005040595  | -0.06349963 | -0.1970706  | -0.07678234 | -0.003350929 | 6.3763       | 2.20         | -0.385698315 | + |
| Sametrigemine-rich splicing factor 1                                                                                             | SGSF1           | 140540000 | 195050000 | 0.83 | 0.85 | -0.23 | 16.494 | -0.6883109  | -0.6481455 | -0.2062623   | -0.1995702  | -0.7941571    | -0.1818416 | -0.02861652 | 0.1230039    | 0.1463945   | 0.1966071   | 0.2055176   | 0.09653179   | 9.37402      | 1.03         | -0.209595749 | + |
| Glutamine-RNA ligase                                                                                                             | QRS             | 246610000 | 256380000 | 1.01 | 0.85 | -0.24 | 16.893 | -0.1806425  | -0.1377886 | -0.1778952   | -0.2113786  | -0.1308675    | -0.2876771 | -0.375141   | -0.3450879   | -0.2811233  | -0.4011204  | -0.1923977  | -0.1923977   | 7.1907       | 6.14         | -0.257834179 | + |
| 40S ribosomal protein S12                                                                                                        | RPS12           | 697920000 | 858180000 | 1.02 | 0.85 | -0.24 | 9.7977 | -0.2788811  | -0.2833338 | -0.3077335   | -0.1808959  | -0.4412004    | -0.2877652 | -0.2271009  | -0.1651131   | -0.0841366  | -0.1044802  | -0.09264783 | -0.09596183  | 4.3405       | 4.36         | -0.260987064 | + |
| Splicing factor 38 subunit 1                                                                                                     | SF3B1           | 246240000 | 206010000 | 0.93 | 0.85 | -0.24 | 18.774 | -0.2045822  | -0.3644963 | 0.05255495   | -0.07723887 | -0.458502     | -0.5260572 | -0.2012942  | -0.1371082   | -0.0249422  | -0.153944   | 0.0204844   | 3.6463       | 2.44         | -0.213356933 | +            |   |
| Interleukin enhancer-binding factor 1                                                                                            | ILF3            | 444420000 | 457240000 | 1.05 | 0.85 | -0.24 | 15.928 | -0.5484956  | -0.159268  | -0.04008153  | -0.1202786  | -0.105847     | -0.5041207 | -0.08565514 | -0.1312392   | -0.09261702 | 0.07107621  | 0.05018827  | 1.4262       | 1.85         | -0.193711972 | +            |   |
| ATP-dependent RNA helicase A                                                                                                     | HEL1            | 149200000 | 128540000 | 0.88 | 0.85 | -0.24 | 21.12  | -0.7242322  | -0.6548049 | -0.3559473   | -0.3559473  | -0.8202396    | -0.705947  | 0.116754    | 0.04753833   | 0.1095611   | 0.05254455  | 0.06669028  | 0.1373714    | 6.1402       | 1.21         | -0.202051096 | + |
| Filamin B                                                                                                                        | FLNB            | 858130000 | 830280000 | 0.96 | 0.85 | -0.24 | 19.186 | -0.4196615  | -0.238552  | -0.286824    | -0.3845272  | -0.3625687    | -0.270588  | 0.1901724   | 0.249232     | 0.2519311   | 0.1988619   | 0.476701    | 0.35         | 0.075364119  | +            |              |   |
| 28S ribosomal protein S29, mitochondrial                                                                                         | DAP3            | 127100000 | 135480000 | 1.03 | 0.84 | -0.24 | 10.54  | -0.2782511  | -0.2187495 | -0.03255102  | -0.2097618  | -0.3183079    | -0.3146608 | -0.4812836  | -0.2473884   | -0.03580105 | NaN         | NaN         | 7.2403       | 2.14         | -0.198139438 | +            |   |
| Heterogeneous nuclear ribonucleoprotein A/B                                                                                      | HNRPAB          | 411480000 | 142930000 | 1.04 | 0.84 | -0.25 | 4.3013 | -0.3255213  | -0.2642179 | -0.2021403   | -0.07419803 | -0.262123     | -0.3142481 | NaN         | NaN          | -0.3480781  | -0.3173009  | NaN         | 7.0505       | 4.15         | -0.263478451 | +            |   |
| ATP-binding cassette sub-family F member 1                                                                                       | ABCF1           | 96610000  | 83279000  | 0.79 | 0.84 | -0.25 | 17.585 | -0.122507   | -0.3500173 | -0.2507833   | -0.3318895  | -0.3318895    | -0.3172469 | -0.02155539 | -0.0108069   | NaN         | NaN         | 0.6292943   | 1.0643       | 2.98         | -0.257521405 | +            |   |
| 40S ribosomal protein S14                                                                                                        | RPS14           | 762500000 | 633060000 | 0.71 | 0.84 | -0.25 | 14.904 | -0.2306214  | -0.1977123 | -0.6686446   | -0.1786618  | -0.1497116    | -0.229154  | -0.1497116  | -0.1497116   | -0.1497116  | -0.1497116  | -0.1497116  | -0.1497116   | 3.0003       | 4.52         | -0.276794354 | + |
| Nucleosome assembly protein 1-like 1                                                                                             | NAP1L1          | 119550000 | 127750000 | 1.02 | 0.84 | -0.25 | 8.2447 | -0.2627805  | -0.3380713 | -0.1955829   | -0.2679132  | -0.2494278    | -0.2692514 | -0.3601936  | NaN          | -0.1528889  | -0.3964983  | 2.9467      | 6.53         | -0.298931038 | +            |              |   |
| 28S ribosomal protein S34, mitochondrial                                                                                         | MRPS34          | 3632400   | 3397700   | 1.11 | 0.84 | -0.25 | 12.9   | -0.09930895 | -0.4619585 | NaN          | -0.2747562  | NaN           | 0.9217181  | -0.1214551  | NaN          | 0.1347467   | NaN         | NaN         | 1.1061       | 0.96         | -0.290741686 | +            |   |
| 40S ribosomal protein S21                                                                                                        | RPS21           | 144100000 | 157990000 | 1.03 | 0.84 | -0.25 | 7.3724 | -0.3051822  | -0.3712177 | -0.1457598   | -0.4206267  | -0.3642735    | -0.2713567 | -0.1908819  | -0.1140508   | 0.009633875 | -0.03161381 | -0.05298471 | 2.9804       | 3.53         | -0.241751401 | +            |   |
| Guanine-nucleotide-acid receptor-associated protein-like 2                                                                       | GABARAPL2       | 3965900   | 38846000  | 0.98 | 0.84 | -0.25 | 14.189 | -0.3669688  | -0.164755  | -0.2779363   | 0.0982842   | -0.471953     | -0.1890558 | NaN         | -0.0650528   | NaN         | -0.2555189  | NaN         | NaN          | 4.3963       | 2.36         | -0.248792239 | + |
| 2,4-dienoyl-CoA reductase, mitochondrial                                                                                         | DCR1            | 93859000  | 102750000 | 1.03 | 0.84 | -0.26 | 3.9597 | -0.3883006  | -0.3928382 | -0.0783656   | -0.137761   | -0.1356494    | -0.366317  | -0.1684794  | -0.003828249 | -0.1574475  | -0.1756313  | -0.3059133  | -0.139612    | 1.0804       | 3.97         | -0.248465287 | + |
| Peptidyl-prolyl cis-trans isomerase D                                                                                            | PPID            | 81556000  | 91270000  | 1.13 | 0.84 | -0.26 | 11.284 | -0.2651339  | -0.1625411 | -0.2789686   | -0.3298667  | -0.1247861    | -0.2630748 | -0.2609556  | -0.07387913  | -0.1879044  | -0.2942786  | NaN         | 1.2505       | 4.90         | -0.221654888 | +            |   |
| Dynamin light chain 1, cytoplasmic                                                                                               | DYLL1           | 32725000  | 36846000  | 1.04 | 0.84 | -0.26 | 8.861  | -0.2998444  | -0.2541345 | -0.125683    | -0.3891487  | NaN           | -0.2854688 | -0.0880135  | -0.1558982   | -0.2518095  | -0.1954432  | -0.3557746  | 1.4405       | 4.84         | -0.256165626 | +            |   |
| Eukaryotic translation initiation factor 3 subunit G                                                                             | EIF3G           | 245460000 | 239350000 | 0.99 | 0.84 | -0.26 | 17.575 | -0.3302556  | -0.2789337 | -0.2121635   | -0.2510166  | -0.3812776    | -0.3812776 | -0.3812776  | -0.3812776   | -0.3812776  | -0.3812776  | -0.3812776  | -0.3812776   | 5.2505       | 4.19         | -0.276724235 | + |
| Glutamate-rich WD repeat-containing protein 1                                                                                    | GRWD1           | 32857000  | 35343000  | 1.08 | 0.84 | -0.26 | 20.946 | -0.7987425  | -0.4826336 | -0.2171721   | NaN         | NaN           | -0.4055088 | NaN         | NaN          | -0.2637848  | -0.3501915  | -0.3501915  | 4.3963       | 2.36         | -0.419672211 | +            |   |
| Eukaryotic translation initiation factor 2 subunit 3; Putative eukaryotic translation initiation factor 2 subunit 3-like protein | EIF2S3, EIF2S3L | 788660000 | 897700000 | 1.08 | 0.83 | -0.26 | 16.644 | -0.3538373  | -0.331663  | -0.4196808   | -0.4651615  | -0.4976082    | 0.06915226 | -0.02580894 | NaN          | NaN         | 0.08841301  | -0.0513062  | 1.8362       | 1.74         | -0.231775469 | +            |   |
| Splicing factor 38 subunit 6                                                                                                     | SF3B6           | 37280000  | 41716000  | 1.00 | 0.83 | -0.26 | 2.3881 | -0.2961019  | -0.3445749 | NaN          | -0.1075857  | -0.5677247    | -0.5473202 | -0.1160508  | -0.114988    | -0.252329   | -0.1843262  | -0.2140994  | -0.0927091   | 4.9504       | 3.31         | -0.258001075 | + |
| 40S ribosomal protein S24                                                                                                        | RPS24           | 347390000 | 380650000 | 1.27 | 0.83 | -0.27 | 16.602 | -0.8102829  | -0.8143388 | -0.7941321   | NaN         | -0.7822231    | -0.2257231 | -0.07297089 | -0.06606483  | -0.1633003  | -0.1633003  | -0.1633003  | -0.1633003   | 8.1404       | 3.09         | -0.463039713 | + |
| Nucleosome sensitive element binding protein 1                                                                                   | YBX1            | 881490000 | 929810000 | 1.18 | 0.83 | -0.27 | 19.087 | -0.5059888  | -0.7442719 | -0.3511184   | -0.737236   | -0.4249782    | -0.4993815 | 0.04582229  | 0.05505682   | 0.04054174  | 0.0155157   | 0.03829577  | 0.122344     | 3.5862       | 1.45         | -0.185563015 | + |
| Sametrigemine-rich splicing factor 2                                                                                             | SGSF2           | 239980000 | 225910000 | 1.40 | 0.83 | -0.27 | 18.985 | -0.8359308  | -0.8944168 | -0.2850202   | -0.1208387  | -0.1859911    | -0.3459013 | -0.1859911  | -0.1859911   | -0.1859911  | -0.1859911  | -0.1859911  | -0.1859911   | 2.97104      | 3.10         | -0.542216413 | + |
| Heterogeneous nuclear ribonucleoprotein Q                                                                                        | SYNCRP          | 130140000 | 138360000 | 1.00 | 0.83 | -0.27 | 12.922 | -0.5134813  | -0.5286356 | -0.3458008   | -0.3417017  | -0.4394807    | -0.5199211 | 0.0205876   | -0.0507863   | -0.1684794  | -0.07998114 | -0.07933051 | -0.001067978 | 4.2103       | 2.94         | -0.241964321 | + |
| ATPase family AAA domain-containing protein 3A                                                                                   | ATAD3A          | 12507000  | 14775000  | 0.99 | 0.83 | -0.27 | 14.687 | -0.4855798  | -0.3251959 | -0.2209505   | -0.2552878  | -0.3059848    | NaN        | NaN         | NaN          | 0.03351105  | -0.1795354  | 1.9363      | 2.71         | -0.251156843 | +            |              |   |
| Extended synaptotagmin 1                                                                                                         | ESYT1           | 884750000 | 809030000 | 0.97 | 0.83 | -0.28 | 14.16  | -0.3420151  | -0.283211  | -0.3335887   | -0.3116137  | -0.2637675    | -0.221812  | -0.021865   | -0.251951    | -0.2407931  | -0.1724428  | -0.06825642 | 1.28605      | 5.89         | -0.243726473 | +            |   |
| 40S ribosomal protein L19                                                                                                        | RPS19           | 230020000 | 213530000 | 1.31 | 0.82 | -0.28 | 29.929 | -0.124574   | -0.9966856 | -0.8022101   | -0.7966109  | -0.105459     | -1.13089   | -0.1215964  | -0.1537675   | -0.04960625 | -0.125683   | -0.100948   | -0.1035034   | 1.8603       | 2.73         | -0.538918278 | + |
| Polr1C-binding protein 2                                                                                                         | PCBP2           | 95953000  | 101340000 | 1.01 | 0.82 | -0.28 | 16.235 | -0.4148451  | -0.29108   | -0.3082157   | -0.4046462  | -0.5089165    | -0.1516002 | -0.3674443  | -0.2836499   | -0.09567631 | -0.133422   | 2.48605     | 4.74         | -0.270138057 | +            |              |   |
| Osteocalcin-stimulating factor 1                                                                                                 | OSTF1           | 20546000  | 27997000  | 1.08 | 0.82 | -0.28 | 7.3073 | -0.5288911  | -0.4276536 | -0.2451125   | -0.2790211  | -0.2          |            |             |              |             |             |             |              |              |              |              |   |

|                                                                                                                                                                                   |                |           |            |      |      |       |        |            |              |             |             |            |             |             |             |             |             |             |             |              |              |              |   |
|-----------------------------------------------------------------------------------------------------------------------------------------------------------------------------------|----------------|-----------|------------|------|------|-------|--------|------------|--------------|-------------|-------------|------------|-------------|-------------|-------------|-------------|-------------|-------------|-------------|--------------|--------------|--------------|---|
| 60S ribosomal protein L28                                                                                                                                                         | RP2L28         | 233920000 | 253133000  | 1.04 | 0.78 | -0.36 | 22.602 | -1.014616  | -1.028617    | -0.833617   | -0.8072252  | -0.9978375 | -1.011908   | -0.3619169  | -0.3501362  | -0.1946415  | -0.2292639  | -0.189088   | -0.1695012  | 1.81604      | 3.74         | 0.5990904    | + |
| 60S ribosomal protein L36&60S ribosomal protein L36a-like                                                                                                                         | RLP36a,RLP36AL | 26266000  | 31173000   | 1.02 | 0.78 | -0.36 | 27.102 | -1.092005  | NaN          | NaN         | NaN         | NaN        | -0.6330987  | -0.2707474  | -0.1490086  | -0.08843659 | -0.01799913 | -0.1960126  | -0.1055509  | 3.74E-02     | 0.308383482  | +            |   |
| ADNreap protein RAD50                                                                                                                                                             | RAD50          | 74447000  | 65127000   | 0.89 | 0.78 | -0.37 | 12.357 | -0.3129993 | -0.2565453   | -0.1737749  | -0.3517739  | -0.2526627 | -0.4518199  | -0.5787579  | -0.5444978  | -0.6055956  | -0.4377796  | NaN         | 1.40606     | 5.85         | 0.433578643  | +            |   |
| Cyclin-dependent kinase 1                                                                                                                                                         | CDK1           | 444420000 | 45307000   | 0.97 | 0.78 | -0.37 | 10.561 | -0.2570108 | -0.3504673   | -0.3160431  | -0.3904719  | -0.3890544 | -0.4292845  | -0.3756651  | -0.4718088  | -0.4852768  | -0.3308825  | -0.3458211  | 9.20E-10    | 9.04         | 0.370687711  | +            |   |
| P2X and LIM domain protein 1                                                                                                                                                      | PDLIM1         | 53807000  | 49607000   | 0.94 | 0.78 | -0.37 | 18.108 | -0.5006465 | -0.2719915   | -0.3342798  | -0.5518603  | -0.5135636 | -0.4939633  | -0.2041406  | -0.1945631  | -0.2974489  | -0.2338881  | -0.2579761  | 0.238101    | 0.53         | -0.12998015  | +            |   |
| HBS1-like protein                                                                                                                                                                 | HBS1L          | 17572000  | 17560000   | 0.86 | 0.77 | -0.37 | 8.0881 | NaN        | NaN          | -0.4514252  | -0.5129756  | -0.6468992 | -0.257597   | NaN         | NaN         | -0.2570044  | -0.3927053  | NaN         | 9.80E-04    | 3.01         | -0.41821211  | +            |   |
| Eukaryotic translation initiation factor 3 subunit L                                                                                                                              | EIF3L          | 214140000 | 212700000  | 0.92 | 0.77 | -0.37 | 13.062 | -0.3014792 | -0.2948979   | -0.2084276  | -0.3650156  | -0.1494443 | -0.5179571  | -0.15962    | NaN         | -0.6129904  | NaN         | -0.5403795  | -0.3841882  | 1.91E-05     | 0.411242843  | +            |   |
| Thymidine kinase, cytosolic                                                                                                                                                       | TK1            | 95248000  | 10353000   | 1.09 | 0.77 | -0.37 | 17.177 | -0.1336538 | -0.3930557   | -0.2322665  | -0.2690254  | -0.3935199 | NaN         | -0.2718618  | -0.7581814  | -0.7985669  | NaN         | -0.07181545 | 1.14E-03    | 2.94         | -0.388643202 | +            |   |
| Myosin regulatory light chain 12A/Myosin regulatory light chain 12B                                                                                                               | MYL12A,MYL12B  | 55595000  | 55909000   | 1.04 | 0.77 | -0.37 | 24.092 | -0.7473906 | -0.5248645   | -0.3216583  | -0.2565276  | -0.7791005 | -0.5175234  | NaN         | -0.252329   | -0.4418021  | -0.3709745  | -0.07734546 | -0.21474    | 9.29E-02     | 1.03         | -0.264051816 | + |
| Chromobox protein homolog 3                                                                                                                                                       | CBX3           | 18597000  | 200630000  | 1.20 | 0.77 | -0.38 | 16.236 | -0.8118859 | -0.409374    | -0.4488236  | -1.079173   | -1.192447  | -0.02573757 | -0.0734089  | -0.1722785  | -0.2501483  | -0.06579299 | -0.0810058  | 0.067779618 | 7.57E-03     | 2.12         | -0.477719681 | + |
| Cell division cycle 5-like protein                                                                                                                                                | CDCL5          | 2197900   | 2079300    | 0.84 | 0.77 | -0.38 | 21.834 | -0.3343526 | -0.751708    | NaN         | NaN         | NaN        | -0.1840011  | -0.02034214 | NaN         | NaN         | NaN         | NaN         | 1.52E-01    | 0.82         | -0.312473393 | +            |   |
| 40S ribosomal protein S16                                                                                                                                                         | RPS16          | 149530000 | 173700000  | 0.82 | 0.77 | -0.38 | 20.38  | -0.7271646 | -0.760338    | -0.6697858  | -0.7047471  | -0.6399841 | -0.1717746  | -0.1103395  | -0.09412542 | -0.09217101 | -0.08699767 | -0.07931032 | 9.48E-04    | 0.2          | -0.396312769 | +            |   |
| Guanine nucleotide-binding protein (G12) subunit alpha                                                                                                                            | GNAI3          | 109898000 | 11226000   | 0.96 | 0.77 | -0.39 | 6.8277 | -0.317903  | -0.3027956   | -0.3372294  | -0.4623958  | -0.3981514 | -0.3841506  | -0.9867593  | -0.2864625  | -0.3803898  | -0.3477843  | NaN         | NaN         | 1.19E-04     | 0.4          | -0.419690886 | + |
| 60S ribosomal protein S5, 40S ribosomal protein S5, N-terminally processed                                                                                                        | RPS5           | 59430000  | 62546000   | 1.20 | 0.77 | -0.39 | 27.71  | -0.9099866 | -0.9409216   | -0.7961097  | -0.7457204  | -0.7981655 | -0.8759683  | -0.2119491  | -0.3596752  | -0.2435574  | -0.1195104  | -0.2218924  | -0.1965085  | 0.53E-04     | 3.79         | -0.439474597 | + |
| Trifunctional purine biosynthetic protein adenosine-3-phosphoribosylamine-glycine ligase/Phosphoribosylglycylamidine cyclodehydration/Phosphoribosylglycinamide formyltransferase | GART           | 234890000 | 238800000  | 0.88 | 0.76 | -0.39 | 13.528 | -0.4156532 | -0.2930937   | -0.4338181  | -0.3851651  | -0.428197  | -0.3993634  | -0.2647898  | -0.3180021  | -0.6784183  | -0.6662948  | -0.5291768  | -0.2439332  | 8.11E-07     | 6.09         | -0.414825467 | + |
| Insulin-like growth factor 2 mRNA-binding protein 3                                                                                                                               | IGFBP3         | 19357000  | 175340000  | 0.91 | 0.76 | -0.39 | 17.804 | -0.785353  | -0.7477781   | -0.3699986  | -0.3634752  | -0.7258995 | -0.6800815  | -0.1447719  | -0.04911355 | -0.1398079  | -0.2985841  | -0.00690315 | -0.01305762 | 1.79E-03     | 2.75         | -0.359244991 | + |
| Poly (ADP-ribose) polymerase 1                                                                                                                                                    | PARP1          | 106380000 | 103850000  | 0.86 | 0.76 | -0.39 | 22.351 | -0.1114925 | -0.008696752 | -0.7321886  | -0.7050293  | -0.5746052 | -0.4974861  | -0.06115411 | -0.07737699 | -0.09510362 | -0.03646811 | -0.09585687 | -0.03829577 | 1.87E-02     | 1.99         | -0.185734439 | + |
| Cold-inducible RNA-binding protein                                                                                                                                                | CIRBP          | 36188000  | 39001000   | 0.89 | 0.76 | -0.40 | 29.52  | -0.8081594 | -0.709151    | NaN         | NaN         | NaN        | -0.3618428  | -0.4563062  | -0.770329   | -0.1697284  | NaN         | NaN         | 0.0299838   | 1.26E-01     | 2.90         | -0.416285475 | + |
| P2X and LIM domain protein 5                                                                                                                                                      | PDLIM5         | 30472000  | 28654000   | 1.04 | 0.76 | -0.40 | 10.17  | NaN        | -0.5428241   | -0.02562387 | -0.07116351 | -0.3015681 | -0.5290103  | NaN         | NaN         | NaN         | -0.7993267  | -0.2367126  | 1.97E-02    | 1.71         | -0.486863068 | +            |   |
| DNA-directed RNA polymerases I and II subunit RPAC1                                                                                                                               | POLR1C         | 14660000  | 15491000   | 1.01 | 0.76 | -0.40 | 12.746 | -0.3539849 | -0.394951    | -0.6124169  | -0.5557994  | -0.6502497 | -0.5888342  | -0.2745293  | -0.2415945  | -0.2478166  | -0.2584424  | NaN         | NaN         | 3.59E-05     | 4.45         | -0.407861879 | + |
| 39S ribosomal protein L41, mitochondrial                                                                                                                                          | MRPL41         | 8495100   | 10379000   | 0.92 | 0.75 | -0.41 | 9.3581 | -0.585454  | -0.4062352   | NaN         | NaN         | -0.3057528 | NaN         | NaN         | NaN         | -0.1750448  | NaN         | NaN         | NaN         | 4.42E-03     | 2.35         | -0.281757408 | + |
| Hsp70-binding protein 1                                                                                                                                                           | HSPBP1         | 29657000  | 31138000   | 0.97 | 0.75 | -0.41 | 15.805 | -0.3583245 | -0.1963431   | -0.6125492  | -0.2965449  | -0.3083229 | -0.2630748  | NaN         | -0.5696933  | -0.3997112  | -0.3214773  | 4.29E-05    | 4.37        | -0.369504144 | +            |              |   |
| 60S ribosomal protein L11                                                                                                                                                         | RLP11          | 77786000  | 66460000   | 1.16 | 0.75 | -0.41 | 19.02  | -1.107741  | -0.778600    | -0.960001   | -1.289765   | -1.081033  | -0.3912475  | -0.3278915  | -0.2615281  | -0.1237859  | -0.1477614  | -0.200419   | 2.11E-04    | 3.64         | -0.65844855  | +            |   |
| Cytochrome c oxidase subunit EC                                                                                                                                                   | COCYC          | 1579700   | 1501000    | 0.96 | 0.75 | -0.42 | 10.043 | -0.4177908 | -0.725893    | -0.4543479  | -0.418902   | NaN        | NaN         | NaN         | -0.1801138  | -0.2148429  | -0.2562096  | NaN         | 1.38E-03    | 2.80         | -0.384559225 | +            |   |
| Eukaryotic translation initiation factor 3 subunit F                                                                                                                              | EIF3F          | 24311000  | 23066000   | 0.93 | 0.75 | -0.42 | 6.9918 | -0.288276  | -0.244839    | -0.1021555  | -0.2497537  | -0.6718988 | -0.6546037  | -0.5134813  | -0.3238049  | -0.4565041  | -0.493459   | -0.1317874  | NaN         | 8.17E-05     | 4.09         | -0.375505752 | + |
| Poly(ADP-ribose) binding protein 2                                                                                                                                                | PAPBN1         | 10879000  | 13001000   | 0.98 | 0.74 | -0.43 | 11.061 | -0.3504122 | -0.4572566   | NaN         | -0.2624344  | NaN        | -0.4785472  | NaN         | -0.9536067  | NaN         | -0.05921687 | -0.276205   | 1.97E-02    | 1.53         | -0.407713353 | +            |   |
| 60S ribosomal protein L31                                                                                                                                                         | RLP31          | 25903000  | 31987000   | 0.99 | 0.74 | -0.43 | 25.131 | -1.056761  | -0.767462    | -0.6734627  | -0.6950218  | -1.084089  | -0.8400034  | -0.2352122  | -0.1300481  | -0.3268416  | -0.2377107  | -0.3276019  | -0.1373569  | 5.56E-05     | 4.25         | -0.7601429   | + |
| Mitochondrial import inner membrane translocase subunit Tim23/Putative mitochondrial import inner membrane translocase subunit Tim23B                                             | TM23B,TM23B    | 64122000  | 67882000   | 1.12 | 0.74 | -0.43 | 8.1433 | -0.1682544 | -0.3824886   | -0.2641312  | -0.5366287  | -0.3998309 | -0.732064   | -0.316582   | NaN         | -0.3024218  | -0.3456194  | -0.4773871  | -0.4876215  | 1.85E-05     | 4.73         | -0.340313623 | + |
| Cytoplasmic dynein 1 light intermediate chain 1                                                                                                                                   | DYNC1L1        | 12315000  | 13156000   | 0.93 | 0.74 | -0.43 | 14.421 | -0.4957966 | -0.3425978   | -0.5206453  | -0.1742632  | -0.4876215 | -0.4510505  | NaN         | NaN         | NaN         | NaN         | -0.07827426 | -0.2871666  | 4.81E-04     | 3.32         | -0.354676971 | + |
| Enoyl-CoA hydratase, mitochondrial                                                                                                                                                | ECI5S          | 4298900   | 44028000   | 0.96 | 0.74 | -0.44 | 12.726 | -0.553378  | -0.4809916   | -0.4881879  | -0.5535978  | -0.6547486 | -0.4400996  | -0.4400654  | -0.3133516  | -0.3306468  | -0.08260643 | -0.2578731  | 2.89E-06    | 5.62         | -0.459365688 | +            |   |
| Eukaryotic translation initiation factor 1                                                                                                                                        | EIF1           | 47308000  | 51338000   | 1.04 | 0.74 | -0.44 | 14.303 | -0.3444833 | NaN          | NaN         | NaN         | -0.7336512 | NaN         | -0.443811   | -0.4633302  | -0.2946372  | -0.0742318  | -0.3644777  | -0.2366031  | 3.97E-06     | 5.40         | -0.450275643 | + |
| 60S ribosomal protein L23                                                                                                                                                         | RLP23          | 70084000  | 73956000   | 0.87 | 0.74 | -0.44 | 15.355 | -0.7110391 | -0.5903103   | -0.6082983  | -0.4857414  | -0.7054293 | -0.6461121  | -0.08457856 | -0.08225508 | -0.0772362  | -0.0182068  | -0.01564032 | 3.71E-03    | 2.43         | -0.33142019  | +            |   |
| Heat shock cognate 7.1 kDa protein                                                                                                                                                | HSPA8          | 191170000 | 1.8204E+10 | 0.98 | 0.74 | -0.44 | 8.6051 | -0.4067323 | -0.4545355   | -0.5087523  | -0.4977305  | -0.5612614 | -0.5566692  | -0.4287213  | -0.3667455  | -0.4630519  | -0.4513069  | -0.4198738  | 5.60E-11    | 10.25        | -0.457304026 | +            |   |
| ATP-dependent RNA helicase DDX42                                                                                                                                                  | DDX42          | 31490000  | 26361000   | 0.84 | 0.74 | -0.44 | 18.065 | -0.2084776 | NaN          | -0.1185417  | -0.118586   | NaN        | -0.5384295  | NaN         | -0.281632   | -0.2327859  | -0.1477614  | -0.200419   | 2.11E-04    | 3.64         | -0.65844855  | +            |   |
| DNA mismatch repair protein Msh2                                                                                                                                                  | MSH2           | 7251600   | 6193600    | 0.92 | 0.73 | -0.44 | 13.982 | -0.293571  | -0.4647838   | -0.3661131  | -0.5778531  | -0.3475151 | -0.8757149  | -0.376126   | NaN         | -0.4573916  | NaN         | -0.4787883  | 1.01E-06    | 6.04         | -0.514898841 | +            |   |
| Eukaryotic translation initiation factor 3 subunit M                                                                                                                              | EIF3M          | 28144000  | 26779000   | 0.95 | 0.73 | -0.45 | 18.611 | -0.2345815 | -0.2727329   | -0.257666   | -0.2677221  | -0.5297808 | -0.5403166  | -0.6138291  | -0.5170279  | -0.4393242  | -0.4766789  | -0.132716   | NaN         | 2.36E-04     | 3.63         | -0.506579675 | + |
| 60S ribosomal protein L26,60S ribosomal protein L26-like 1                                                                                                                        | RLP26,RLP26L1  | 18846000  | 16827000   | 0.88 | 0.73 | -0.45 | 25.427 | -1.103767  | -0.6688681   | -0.8652008  | -1.082561   | -0.9672784 | -0.1268308  | -0.2520936  | -0.153823   | -0.271409   | -0.2922103  | 1.33E-04    | 3.88        | 0.616745045  | +            |              |   |
| Eukaryotic translation initiation factor 5B                                                                                                                                       | EIF5B          | 19872000  | 17428000   | 0.79 | 0.73 | -0.45 | 16.895 | -0.491252  | -0.4520173   | -0.6665076  | -0.688883   | -0.6978772 | -0.7500788  | -0.1068087  | -0.1454457  | -0.02034214 | -0.2360816  | -0.1886277  | -0.05328412 | 7.19E-04     | 3.14         | -0.358343716 | + |
| 60S ribosomal protein S26/Putative 40S ribosomal protein S26-like 1                                                                                                               | RPS26,RPS26P11 | 35030000  | 37302000   | 1.04 | 0.73 | -0.45 | 27.618 | -0.876635  | -0.8114724   | -0.7224109  | -0.620135   | -0.8625752 | -0.7432308  | -0.1304037  | -0.06745496 | -0.0555763  | -0.0985437  | -0.0999991  | -0.2466864  | 1.42E-02     | 1.85         | -0.37228879  | + |
| Zinc finger CCHC-type antiviral protein 1                                                                                                                                         | ZC3H4V1        | 29636000  | 27283000   | 0.70 | 0.73 | -0.46 | 18.866 | NaN        | -0.6949517   | NaN         | -0.5257379  | NaN        | -0.6360128  | -0.344663   | -0.4401302  | -0.3124699  | -0.1569649  | -0.4078803  | 4.14E-04    | 3.38         | -0.373189564 | +            |   |
| DNA-EC-sdsU-selecting enzyme APBEC-3C                                                                                                                                             | APBEC3C        | 32318000  | 26752000   | 1.06 | 0.73 | -0.46 | 15.249 | -0.715249  | -0.7891124   | -0.3127601  | -0.7039246  | -0.6039103 | -0.2654833  | -0.3394557  | -0.3849504  | -0.2455571  | -0.127204   | NaN         | 1.22E-04    | 3.91         | -0.459081807 | +            |   |
| 60S ribosomal protein S11                                                                                                                                                         | RLP15          | 19593000  | 40992000   | 0.97 | 0.73 | -0.46 | 14.813 | -0.102704  | -0.3467913   | -0.4520277  | -0.4986178  | -0.214483  | -0.02052932 | -0.0523147  | -0.0718482  | -0.0180896  | -0.0252247  | 2.81E-03    | 2.55        | -0.455379403 | +            |              |   |
| Eukaryotic translation initiation factor 3 subunit A                                                                                                                              | EIF3A          | 63090000  | 54400000   | 0.84 | 0.72 | -0.46 | 12.264 | -0.462172  | -0.391444    | -0.4313063  | -0.2447193  | -0.651609  | -0.5542661  | -0.5038841  | -0.4697894  | -0.4769399  | -0.5422001  | -0.3603974  | 7.88E-09    | 1.01         | -0.466640541 | +            |   |
| Heterogeneous nuclear ribonucleoprotein A0                                                                                                                                        | HNRPAA0        | 58273000  | 71730000   | 0.84 | 0.72 | -0.46 | 24.118 | -0.5761529 | -0           |             |             |            |             |             |             |             |             |             |             |              |              |              |   |

|                                                                 |               |            |            |      |      |       |        |            |            |            |            |            |            |             |              |              |             |              |             |             |             |             |             |   |
|-----------------------------------------------------------------|---------------|------------|------------|------|------|-------|--------|------------|------------|------------|------------|------------|------------|-------------|--------------|--------------|-------------|--------------|-------------|-------------|-------------|-------------|-------------|---|
| Ras GTPase-activating protein-binding protein 2                 | G3BP2         | 121840000  | 106810000  | 0.71 | 0.66 | -0.59 | 29.197 | -0.7624853 | -0.8372743 | -0.6143149 | -0.5746696 | -0.9275785 | -0.9512895 | NaN         | NaN          | NaN          | NaN         | -0.03056025  | -0.08421142 | 2.20603     | 2.66        | 0.597797968 | +           |   |
| 40S ribosomal protein S20                                       | RPS20         | 766690000  | 638990000  | 0.70 | 0.66 | -0.59 | 21.061 | -0.8865929 | -0.6746366 | -0.624132  | -0.5563721 | -0.7570379 | -0.7453334 | -0.06239953 | -0.007898733 | -0.000591656 | 0.02955887  | 0.1255188    | 0.04781753  | 1.13620     | 1.95        | 0.342674966 | +           |   |
| Superficial keratinolytic activity 2-like2                      | SKV2L2        | 151300000  | 119210000  | 0.67 | 0.66 | -0.60 | 22.349 | -0.8010283 | -0.6933178 | -0.6488004 | -0.5549002 | -0.8091465 | -0.5758007 | -0.529989   | -0.4511294   | -0.3636236   | -0.4331752  | -0.4079248   | -0.290233   | 6.47607     | 6.19        | 0.586635777 | +           |   |
| Fatty acid synthase                                             | FASN          | 907370000  | 719800000  | 0.82 | 0.66 | -0.60 | 15.749 | -0.6251998 | -0.541723  | -0.5757873 | -0.5267845 | -0.494292  | -0.7013652 | -0.355534   | -1.707407    | -0.9835892   | -0.5497257  | -0.7755890   | -0.7484809  | 1.64605     | 4.79        | 0.722123124 | +           |   |
| Myosin light polypeptide 6                                      | MYL6          | 87255000   | 79967000   | 0.90 | 0.66 | -0.60 | 13.352 | -0.8941075 | -0.7433274 | -0.3964223 | -0.209278  | -0.7557218 | -0.6584013 | -0.4450281  | -0.3164562   | -0.5276162   | -0.4221725  | -0.3385787   | -0.3206303  | 5.50606     | 5.26        | 0.502031682 | +           |   |
| 40S ribosomal protein S15a                                      | RPS15A        | 583560000  | 523020000  | 0.87 | 0.66 | -0.61 | 24.493 | -0.9355034 | -0.9035493 | -0.6724046 | -0.7152727 | -0.8611593 | -0.7099295 | -0.1885598  | -0.1242889   | -0.1458767   | -0.02077945 | -0.0712444   | -0.02077945 | 1.21603     | 2.92        | 0.458094511 | +           |   |
| 40S ribosomal protein L35                                       | RPL35         | 239670000  | 276330000  | 0.70 | 0.65 | -0.61 | 29.509 | -0.9601879 | -0.7621672 | -0.5500425 | -0.4480772 | -0.8421845 | -0.7869701 | 0.02232628  | -0.139312    | 0.1538053    | 0.02389408  | -0.1479507   | -0.1261688  | 6.03603     | 2.22        | 0.481547778 | +           |   |
| 40S ribosomal protein S6                                        | RPS6          | 453380000  | 506550000  | 0.70 | 0.65 | -0.62 | 19.468 | -0.8770005 | -0.9960524 | -0.6403438 | -0.5458872 | -0.8812948 | -0.8666205 | -0.108476   | -0.0565512   | -0.03765807  | -0.1365373  | 0.006046604  | -0.1390452  | 2.68603     | 2.57        | 0.43577373  | +           |   |
| Ubiquitin-conjugating enzyme E2 5                               | UBE25         | 42414000   | 41908000   | 0.88 | 0.65 | -0.62 | 8.5214 | -0.1288818 | -0.3414194 | -0.716487  | -0.6440365 | -0.5070291 | -0.7126696 | -0.3713104  | -0.5957387   | -0.4527971   | -0.155311   | -0.1849785   | -0.1849785  | 1.37504     | 3.86        | 0.481339053 | +           |   |
| Eukaryotic translation initiation factor 3 subunit D            | EIF3D         | 121420000  | 112750000  | 1.00 | 0.65 | -0.62 | 15.981 | -0.3949229 | -0.6120199 | -0.3468116 | -0.5838521 | -0.6549216 | -0.862208  | -0.2281144  | -0.3101999   | -0.4113873   | -0.2628497  | -0.1996364   | -0.6075068  | -0.339903   | 4.93606     | 5.48        | 0.530771578 | + |
| Importin subunit alpha-1                                        | KPNA2         | 706490000  | 580150000  | 0.81 | 0.65 | -0.62 | 15.832 | -0.7109796 | -0.5774225 | -0.6992553 | -0.5318689 | -0.8315778 | -0.8492843 | -0.3995123  | -0.3511861   | -0.4887787   | -0.2677961  | -0.1328784   | -0.3255181  | 6.26407     | 6.20        | 0.526180796 | +           |   |
| Nucleic polypeptide-associated complex subunit alpha            | NACA          | 530110000  | 465630000  | 0.78 | 0.65 | -0.62 | 11.983 | -0.8211555 | -0.6473838 | -0.6131189 | -0.711485  | -0.8535795 | -0.3591233 | -0.571361   | -0.3591233   | -0.571361    | -0.3591233  | -0.571361    | -0.3591233  | -0.571361   | 6.26407     | 6.20        | 0.526180796 | + |
| Eukaryotic translation initiation factor 4 gamma 2              | EIF4G2        | 12215000   | 82797000   | 0.69 | 0.64 | -0.63 | 24.218 | -0.9158848 | -0.8415233 | -0.54905   | -0.448014  | -1.255184  | -0.4527971 | -0.3101999  | -0.4113873   | -0.2628497   | -0.1996364  | -0.6075068   | -0.339903   | 4.93606     | 5.48        | 0.530771578 | +           |   |
| DNA topoisomerase 1                                             | TOP1          | 61047000   | 65898000   | 0.65 | 0.64 | -0.64 | 29.402 | -0.8978048 | -0.5407572 | -0.8454227 | -0.7448014 | -0.8520421 | -0.781093  | -0.1882743  | -0.2697513   | -0.1849785   | -0.1849785  | -0.1849785   | -0.1849785  | 1.37504     | 3.86        | 0.481339053 | +           |   |
| Cytochrome c oxidase subunit 2                                  | MT-CO2        | 18266000   | 16322000   | 0.99 | 0.64 | -0.64 | 11.076 | -0.8236261 | -0.8018579 | -0.39533   | -0.793882  | -0.6994194 | -0.7947826 | -0.5784562  | -0.5608131   | -0.5329292   | -0.5524948  | -0.5117112   | -0.5466668  | 1.05608     | 7.98        | 0.654239942 | +           |   |
| 40S ribosomal protein S25                                       | RPS25         | 858990000  | 809110000  | 0.77 | 0.64 | -0.65 | 21.473 | -0.7271884 | -0.8036196 | -0.9306553 | -0.7621672 | -0.7622346 | -0.7620937 | -0.1420031  | -0.7152077   | -0.07313524  | -0.1083786  | -0.003683579 | 1.13603     | 2.95        | 0.453504804 | +           |             |   |
| Eukaryotic translation initiation factor 3 subunit E            | EIF3E         | 290720000  | 267910000  | 0.88 | 0.64 | -0.65 | 22.525 | -0.5007077 | -0.5818951 | -0.5240228 | -0.3639949 | -0.8543617 | -0.8008187 | -0.3101999  | -0.4113873   | -0.2628497   | -0.1996364  | -0.6075068   | -0.339903   | 4.93606     | 5.48        | 0.530771578 | +           |   |
| Phosphoglycerate kinase 1                                       | PFKP1         | 181840000  | 131160000  | 0.80 | 0.64 | -0.65 | 16.034 | -0.8666996 | -0.7196376 | -0.7296265 | -0.6579915 | -0.8161134 | -0.7594824 | -0.3101999  | -0.4113873   | -0.2628497   | -0.1996364  | -0.6075068   | -0.339903   | 4.93606     | 5.48        | 0.530771578 | +           |   |
| 40S ribosomal protein S10                                       | RPS10         | 395310000  | 344840000  | 0.81 | 0.63 | -0.67 | 26.661 | -0.7830424 | -0.7973187 | -0.719115  | -0.6558305 | -0.7027498 | -0.1650945 | -0.2890514  | -0.002830427 | 0.01720924   | -0.1637042  | -0.1441059   | 8.80604     | 3.06        | 0.425415987 | +           |             |   |
| 60S ribosomal protein L36                                       | RPL36         | 255940000  | 197570000  | 0.61 | 0.61 | -0.70 | 23.879 | -1.134224  | -1.157045  | -0.8704337 | -0.8318972 | -1.120482  | -1.002281  | -0.5982385  | -0.6765031   | -0.4435754   | -0.3193696  | -0.3086445   | -0.3787569  | 8.17606     | 5.09        | 0.736785971 | +           |   |
| 60S ribosomal protein L10a                                      | RPL10A        | 809000000  | 617760000  | 0.85 | 0.61 | -0.72 | 24.474 | -1.155887  | -1.125195  | -0.8718547 | -0.8878203 | -1.126643  | -1.13841   | -0.4818275  | -0.5032412   | -0.3236965   | -0.3836867  | -0.2642526   | -0.3021729  | 3.42605     | 4.47        | 0.717891691 | +           |   |
| 60S ribosomal protein L6                                        | RPL6          | 625470000  | 515680000  | 0.64 | 0.60 | -0.73 | 21.219 | -1.037207  | -0.9677017 | -0.754546  | -0.8657884 | -0.9727899 | -1.07133   | -0.3929515  | -0.3404042   | -0.286342    | -0.3144096  | -0.1727501   | -0.1778001  | 9.20605     | 4.04        | 0.617765194 | +           |   |
| 60S ribosomal protein L8                                        | RPL8          | 263350000  | 234510000  | 0.63 | 0.60 | -0.73 | 11.48  | -1.00474   | -1.007899  | -0.8143134 | -0.6750972 | -0.9195061 | -1.11391   | -0.5583465  | -0.5844577   | -0.2880118   | -0.3022762  | -0.58077     | -0.5332841  | 2.50606     | 5.60        | 0.689827656 | +           |   |
| Eukaryotic translation initiation factor 3 subunit K            | EIF3K         | 108850000  | 91222000   | 0.80 | 0.60 | -0.73 | 9.8901 | -0.7115824 | -0.6589251 | -0.6089362 | -0.520252  | -0.900395  | -0.9733275 | -0.9207892  | -0.139073    | -0.7673637   | -0.8264375  | -0.5466662   | 4.93606     | 7.31        | 0.701789903 | +           |             |   |
| 60S ribosomal protein S28                                       | RPS28         | 54412000   | 64100000   | 0.81 | 0.60 | -0.74 | 26.234 | -0.86019   | -0.8122575 | -0.5596643 | -0.8424663 | -0.745657  | -0.3551654 | -0.2177592  | -0.1727851   | -0.114337    | -0.110324   | -0.09602082  | 8.64604     | 3.46        | 0.42008915  | +           |             |   |
| Probable ATP-dependent RNA helicase DDX5                        | DDX5          | 1560800000 | 1377100000 | 0.88 | 0.59 | -0.75 | 19.507 | -1.292157  | -1.120363  | -0.837035  | -0.9785203 | -1.404535  | -0.199404  | -0.3793948  | -0.5867525   | -0.9633982   | -0.7168131  | -0.4352413   | -0.4709486  | 3.39606     | 5.47        | 0.863843923 | +           |   |
| Probable ATP-dependent RNA helicase DDX47                       | DDX47         | 11795000   | 12535000   | 0.73 | 0.59 | -0.76 | 29.185 | -0.9332977 | -0.8257214 | -0.4250944 | -0.8128011 | -0.7914999 | -0.5920056 | -0.3310277  | -0.5920056   | -0.3310277   | -0.5920056  | -0.3310277   | -0.5920056  | 2.25604     | 3.65        | 0.671312549 | +           |   |
| 40S ribosomal protein S8                                        | RPS8          | 184510000  | 136820000  | 0.81 | 0.59 | -0.77 | 21.865 | -1.050413  | -1.063228  | -0.815762  | -0.8674101 | -1.044062  | -0.9391779 | -0.2436598  | -0.2345331   | -0.2797041   | -0.1788939  | -0.1981957   | -0.2573728  | 2.45604     | 3.61        | 0.597851064 | +           |   |
| 60S ribosomal protein L23a                                      | RPL23A        | 765200000  | 602970000  | 0.72 | 0.59 | -0.77 | 19.84  | -1.021746  | -0.9832755 | -0.7420721 | -0.8199285 | -0.9919435 | -0.971742  | -0.2950926  | -0.3695759   | -0.1790082   | -0.1961177  | -0.1568201   | -0.2114479  | 2.17604     | 3.66        | 0.578230313 | +           |   |
| 40S ribosomal protein S13                                       | RPS13         | 1128700000 | 983100000  | 0.68 | 0.58 | -0.77 | 25.484 | -1.044777  | -1.041863  | -0.7578427 | -0.7470758 | -0.9501463 | -0.8809227 | -0.1519871  | -0.1756965   | -0.1444089   | -0.04595264 | -0.153639    | -0.1389022  | 1.13603     | 2.95        | 0.519434423 | +           |   |
| 40S ribosomal protein L3                                        | RPL3          | 911760000  | 632680000  | 0.68 | 0.58 | -0.79 | 18.976 | -1.054512  | -1.119009  | -0.7486878 | -0.7199037 | -1.020487  | -0.9710915 | -0.1776131  | -0.4846039   | -0.1154455   | -0.1125683  | -0.1492486   | -0.1010565  | 4.37604     | 3.36        | 0.580864739 | +           |   |
| Polyadenylate-binding protein 1:Polyadenylate-binding protein 3 | PABPC1/PABPC3 | 2056400000 | 1447700000 | 0.65 | 0.58 | -0.79 | 18.338 | -0.8737407 | -0.8489724 | -0.6850199 | -0.6844106 | -0.9434901 | -0.999447  | -0.6331882  | -0.5337644   | -0.6223764   | -0.6539341  | -0.5188603   | -0.5187837  | 1.43608     | 7.84        | 0.707848929 | +           |   |
| 40S ribosomal protein S4, X isoform                             | RPS4X         | 139360000  | 128030000  | 0.70 | 0.57 | -0.80 | 24.553 | -0.9608283 | -0.974633  | -0.9030365 | -0.7787045 | -0.9294733 | -0.8278198 | -0.09181732 | -0.005289984 | -0.03498781  | -0.03498781 | -0.1248648   | -0.1442972  | 3.20603     | 2.49        | 0.479262929 | +           |   |
| Transcription factor BTF3                                       | BTF3          | 121030000  | 87758000   | 0.80 | 0.57 | -0.81 | 18.423 | -0.6829275 | -0.8451576 | -1.043051  | -0.9762194 | -1.043438  | -0.9316781 | -0.7716923  | -0.755113    | -0.664128    | -0.7228007  | -0.8793296   | -0.8192885  | 1.55610     | 9.81        | 0.842363631 | +           |   |
| 40S ribosomal protein L30                                       | RPL30         | 582680000  | 468120000  | 0.68 | 0.57 | -0.82 | 23.464 | -1.049967  | -1.002397  | -0.8077554 | -0.7422376 | -1.043319  | -1.002021  | -0.3593005  | -0.470189    | -0.3240214   | -0.2642072  | -0.2868604   | -0.3201158  | 6.54405     | 4.18        | 0.627702564 | +           |   |
| 40S ribosomal protein S7                                        | RPS7          | 349430000  | 312060000  | 0.73 | 0.56 | -0.82 | 24.59  | -0.9337937 | -0.8189865 | -0.7377899 | -0.9663197 | -0.9358069 | -0.1246131 | -0.1643992  | -0.1212198   | -0.2275569   | -0.09309399 | 8.50604      | 3.07        | 0.500837103 | +           |             |             |   |
| 60S ribosomal protein L21                                       | RPL21         | 752460000  | 593510000  | 0.69 | 0.56 | -0.83 | 26.234 | -1.159235  | -1.16482   | -0.9405063 | -0.966348  | -1.200117  | -1.102589  | -0.5944433  | -0.3667455   | -0.3613978   | -0.3703403  | -0.4025689   | -0.3867324  | 1.93605     | 4.71        | 0.71312026  | +           |   |
| 1,2-dihydroxy-3-keto-5-methylthiopentene dioxygenase            | ADH1          | 47821000   | 32685000   | 0.65 | 0.56 | -0.84 | 16.387 | -0.7550642 | -0.6517222 | -0.804728  | -1.100824  | -1.06362   | -1.183998  | -1.040497   | -0.9053046   | -0.9053046   | -0.9053046  | -0.9053046   | -0.9053046  | 2.13606     | 5.67        | 0.938219838 | +           |   |
| 60S ribosomal protein L27                                       | RPL27         | 675900000  | 497520000  | 0.58 | 0.56 | -0.84 | 23.444 | -1.142895  | -0.8218975 | -0.7869701 | -0.9588915 | -0.9298854 | -0.3096813 | -0.2592192  | -0.2188669   | -0.1407301   | -0.2671317  | -0.1762507   | -0.165404   | 3.44        | 4.44        | 0.608490902 | +           |   |
| 60S ribosomal protein L7a                                       | RPL7A         | 959000000  | 759170000  | 0.61 | 0.55 | -0.85 | 14.657 | -1.170979  | -1.201742  | -0.8159156 | -0.8967106 | -1.131147  | -0.9665735 | -0.5068241  | -0.4616009   | -0.3883176   | -0.2503713  | -0.4999506   | -0.541618   | 1.02605     | 4.99        | 0.736139181 | +           |   |
| Ribosome biogenesis protein BRX1 homolog                        | BRX1          | 87894000   | 56882000   | 0.61 | 0.55 | -0.86 | 18.843 | -0.9723081 | -1.198725  | -0.5960998 | -0.612483  | -0.91588   | -1.09542   | -0.4636088  | -0.3101999   | -0.4113873   | -0.2628497  | -0.1996364   | -0.6075068  | -0.339903   | 4.93606     | 5.48        | 0.530771578 | + |
| Caprin-1                                                        | CAPRIN1       | 197160000  | 19186000   |      |      |       |        |            |            |            |            |            |            |             |              |              |             |              |             |             |             |             |             |   |

- a Summed up eXtracted Ion Current (XIC) of the isotopic cluster belonging to the light label partner of all peptide ions assigned to a Protein Group. It is proportional to the analyte concentration/abundance in the cell grown in the light medium
- b Summed up eXtracted Ion Current (XIC) of the isotopic cluster belonging to the heavy label partner of all peptide ions assigned to a Protein Group. It is proportional to the analyte concentration/abundance in the cell grown in the heavy medium
- c Median of all ratios between the intensities of each heavy and light label peptide partners. It is also called "SILAC ratio"
- d Assuming that most proteins do not change in a comparative analysis, the median of H/L ratio sub-populations was shifted to 1. Generally this value is preferred to the previous one, for minimizing the effect of outliers and for correcting for unequal protein amounts.
- e We use the log<sub>2</sub> for ratios because we want to represent up and down regulated proteins on the same scale
- f Coefficient of variability over all redundant quantifiable peptides. It is calculated as the standard deviation of the natural logarithm of ratios times 100. These data are used for a statistical evaluation of SILAC ratios over all the twelve experiments. In "forward" experiments (FRW), cells treated with quercetin were grown in a medium containing Arg and Leu heavy labelled; consequently original H/L normalised ratios, expressed as log<sub>2</sub> were used.
- g Conversely, in "reverse" experiments (REV) "heavy" cell cultures refers to the untreated status: for sake of clarity, in columns inverted values for H/L normalised ratios are shown. In the legend of single experiments, numbers refers to the biological replicates, whereas letters to the technical replicates.
- h *p* -value was obtained performing one sample T Test
- i Numerical column with the -log<sub>10</sub> transformed *p* - value
- l Numerical column with the t-test difference corresponding to average of expression value
- m '+' shows statistically significant quantitative data with respect to the specified threshold <0.05
