# Supplementary material for: Proteomic Analysis of Quercetin-Treated K562 Cells
Source: MDPI journal article supplement (doi:10.3390/ijms21010032), 2019-12-19
Supplement: s1 [file s1]

**Table S4**  
**Summary of enriched metabolic pathways and their statistics**

| Change | GeneSet       | size <sup>a</sup> | description                                    | expect <sup>b</sup> | DEPs <sup>c</sup> | Gene Symbol                                                                                                                                                                                                                                 | ratio <sup>d</sup> | pValue <sup>e</sup> | FDR <sup>e</sup> |
|--------|---------------|-------------------|------------------------------------------------|---------------------|-------------------|---------------------------------------------------------------------------------------------------------------------------------------------------------------------------------------------------------------------------------------------|--------------------|---------------------|------------------|
| up     | R-HSA-6791465 | 2                 | Pentose phosphate pathway disease              | 0.00                | 1                 | TALDO1                                                                                                                                                                                                                                      | 251.26             | 3.98E-03            | 7,19E-01         |
| up     | R-HSA-189451  | 11                | Heme biosynthesis                              | 0.02                | 2                 | FECH<br>HMBS                                                                                                                                                                                                                                | 91.37              | 2.05E-04            | 2,04E-01         |
| up     | R-HSA-379716  | 24                | Cytosolic tRNA Aminoacylation                  | 0.05                | 2                 | GARS<br>AARS                                                                                                                                                                                                                                | 41.88              | 1.01E-03            | 4.04E-01         |
| up     | R-HSA-71291   | 370               | Metabolism of amino acids and derivatives      | 0.74                | 5                 | SLC3A2<br>TXNRD1<br>GSR<br>CTH<br>PHGDH                                                                                                                                                                                                     | 6.79               | 6,59E-04            | 3,28E-01         |
| down   | R-HSA-77348   | 5                 | Beta oxidation of octanoyl-CoA to hexanoyl-CoA | 0.03                | 1                 | ACADM                                                                                                                                                                                                                                       | 30.15              | 3.27E-02            | 1,00E+00         |
| down   | R-HSA-72766   | 291               | Translation                                    | 1.93                | 42                | RPLP2<br>RPL13A<br>RPLP1<br>RPL9<br>RPL18<br>RPL18A<br>RPL7<br>RPL10<br>RPL17<br>RPL4<br>RPL7A<br>RPL27<br>RPL21<br>RPS7<br>RPL30<br>RPS4X<br>RPL3<br>RPS13<br>RPL23A<br>RPS8<br>RPS28<br>EIF3K<br>RPL8<br>RPL6<br>RPL10A<br>RPL36<br>RPS10 | 21.76              | 0,00E+00            | 0,00E+00         |

|      |               |     |                                        |      |    |                                                                                                                                                                                                                          |       |          |          |
|------|---------------|-----|----------------------------------------|------|----|--------------------------------------------------------------------------------------------------------------------------------------------------------------------------------------------------------------------------|-------|----------|----------|
|      |               |     |                                        |      |    | EIF3E<br>RPS25<br>EIF3D<br>RPS6<br>RPL35<br>RPS15A<br>RPS20<br>RPS3A<br>EEF2<br>RPL27A<br>RPL5<br>RPS3<br>TRMT112<br>RPS19<br>RPL35A                                                                                     |       |          |          |
| down | R-HSA-2426168 | 42  | Activation of gene expression by SREBF | 0.28 | 3  | HMGCS1<br>FASN<br>IDI1                                                                                                                                                                                                   | 10.77 | 2.67E-03 | 1.25E-01 |
| down | R-HSA-8953854 | 673 | Metabolism of RNA                      | 4.46 | 46 | RPLP2<br>RPL13A<br>RPLP1<br>RPL9<br>RPL18<br>RPL18A<br>RPL7<br>NAT10<br>NHP2<br>RPL10<br>RPL17<br>RPL4<br>RPL7A<br>RPL27<br>RPL21<br>RPS7<br>RPL30<br>RPS4X<br>RPL3<br>RPS13<br>RPL23A<br>RPS8<br>DDX47<br>DDX5<br>RPS28 | 10.10 | 0,00E+00 | 0,00E+00 |

|      |               |      |         |      |    |                                                                                                                                                                                                |      |          |          |
|------|---------------|------|---------|------|----|------------------------------------------------------------------------------------------------------------------------------------------------------------------------------------------------|------|----------|----------|
|      |               |      |         |      |    | RPL8<br>RPL6<br>RPL10A<br>RPL36<br>RPS10<br>RPS25<br>RPS6<br>RPL35<br>RPS15A<br>RPS20<br>DDX21<br>RPS3A<br>RPL27A<br>NCL<br>RPL5<br>RPS3<br>TRMT112<br>HNRNPA3<br>RPS19<br>EDC4<br>RPL35A      |      |          |          |
| down | R-HSA-1643685 | 1054 | Disease | 6.99 | 40 | RPLP2<br>RPL13A<br>RPLP1<br>RPL9<br>RPL18<br>RPL18A<br>RPL7<br>RPL10<br>RPL17<br>RPL4<br>RPL7A<br>RPL27<br>RPL21<br>RPS7<br>RPL30<br>RPS4X<br>RPL3<br>RPS13<br>RPL23A<br>RPS8<br>RPS28<br>RPL8 | 5.72 | 0,00E+00 | 0,00E+00 |

|      |               |      |                                                 |      |    |                                                                                                                                                                                                |       |          |          |
|------|---------------|------|-------------------------------------------------|------|----|------------------------------------------------------------------------------------------------------------------------------------------------------------------------------------------------|-------|----------|----------|
|      |               |      |                                                 |      |    | RPL6<br>RPL10A<br>RPL36<br>RPS10<br>RPS25<br>KPNA2<br>RPS6<br>RPL35<br>RPS15A<br>RPS20<br>RPS3A<br>LMNB1<br>EEF2<br>RPL27A<br>RPL5<br>RPS3<br>RPS19<br>RPL35A                                  |       |          |          |
| down | R-HSA-499943  | 30   | Metabolism of nucleotides di- and triphosphates | 0.20 | 3  | TYMS<br>RRM1<br>RRM2                                                                                                                                                                           | 15.08 | 9.98E-04 | 4.79E-02 |
| down | R-HSA-1266738 | 1074 | Developmental Biology                           | 7.14 | 38 | RPLP2<br>RPL13A<br>RPLP1<br>RPL9<br>RPL18<br>RPL18A<br>RPL7<br>RPL10<br>RPL17<br>RPL4<br>RPL7A<br>RPL27<br>RPL21<br>RPS7<br>RPL30<br>RPS4X<br>RPL3<br>RPS13<br>RPL23A<br>RPS8<br>RPS28<br>RPL8 | 5.33  | 0        | 0        |

|      |             |     |                                           |      |    |                                                                                                                                                                                                                                            |       |   |   |
|------|-------------|-----|-------------------------------------------|------|----|--------------------------------------------------------------------------------------------------------------------------------------------------------------------------------------------------------------------------------------------|-------|---|---|
|      |             |     |                                           |      |    | RPL6<br>RPL10A<br>RPL36<br>RPS10<br>RPS25<br>RPS6<br>RPL35<br>RPS15A<br>MYL6<br>RPS20<br>RPS3A<br>RPL27A<br>RPL5<br>RPS3<br>RPS19<br>RPL35A                                                                                                |       |   |   |
| down | R-HSA-71291 | 370 | Metabolism of amino acids and derivatives | 2.45 | 38 | RPLP2<br>RPL13A<br>RPLP1<br>RPL9<br>RPL18<br>RPL18A<br>RPL7<br>RPL10<br>RPL17<br>RPL4<br>RPL7A<br>RPL27<br>ADI1<br>RPL21<br>RPS7<br>RPL30<br>RPS4X<br>RPL3<br>RPS13<br>RPL23A<br>RPS8<br>RPS28<br>RPL8<br>RPL6<br>RPL10A<br>RPL36<br>RPS10 | 15.58 | 0 | 0 |

|  |  |  |  |  |  |                                                                                                 |  |  |  |
|--|--|--|--|--|--|-------------------------------------------------------------------------------------------------|--|--|--|
|  |  |  |  |  |  | RPS25<br>RPS6<br>RPL35<br>RPS15A<br>RPS20<br>RPS3A<br>RPL27A<br>RPL5<br>RPS3<br>RPS19<br>RPL35A |  |  |  |
|--|--|--|--|--|--|-------------------------------------------------------------------------------------------------|--|--|--|

- a numbers of genes in the category
- b expected number of genes for a statistically significant enrichment
- c number of protein hits demonstrated by this study differentially expressed in quercetin-treated k562 cells
- d enrichment ratio according to the WEBGestalt algorithm
- e The p value of the new version WebGestalt is calculated from R. Zero means it is smaller than 2.220446E-16, the smallest positive floating-point number in R on the machine
