# Supplementary material for: Proteomic Analysis of Quercetin-Treated K562 Cells
Source: MDPI journal article supplement (doi:10.3390/ijms21010032), 2019-12-19
Supplement: s1 [file s1]

**Table S3**  
**Summary of enriched functional categories and their statistics**

| Change | GeneSet    | size <sup>a</sup> | description                                       | expected <sup>b</sup> | DEPs <sup>c</sup> | Gene Name                                                                                                                                                                                                                                                      | ratio <sup>d</sup> | pValue <sup>e</sup> | FDR <sup>e</sup> |
|--------|------------|-------------------|---------------------------------------------------|-----------------------|-------------------|----------------------------------------------------------------------------------------------------------------------------------------------------------------------------------------------------------------------------------------------------------------|--------------------|---------------------|------------------|
| up     | GO:0006520 | 318               | cellular amino acid metabolic process             | 0.55                  | 7                 | GLCM;CTH;PHGDH;GARS;SEPHS1;GFPT1;AARS                                                                                                                                                                                                                          | 12.53              | 9.14E-07            | 0.001            |
| up     | GO:0016053 | 401               | organic acid biosynthetic process                 | 0.70                  | 6                 | CTH;PHGDH;CBR1;HK1;ANXA1;SEPHS1                                                                                                                                                                                                                                | 8.52               | 5.52E-05            | 0.023            |
| up     | GO:0006091 | 469               | generation of precursor metabolites and energy    | 0.82                  | 6                 | TXNRD1;GSR;PHGDH;HK1;FECH;GFPT1                                                                                                                                                                                                                                | 7.829              | 1.31E-04            | 0.037            |
| down   | GO:0022613 | 440               | ribonucleoprotein complex biogenesis              | 2.47                  | 33                | RPL13A;RPL7;NAT10;NHP2;RPL10;NPM3;BRIX1;RPL7A;RPL27;RPS7;RPL3;RPL23A;RPS8;DDX47;RPS28;EIF3K;RPL6;RPL10A;RPS10;EIF3E;EIF3D;RPS6;RPL35;G3BP2;DDX21;RBMX;RPL5;TRMT112;G3BP1;DDX3X;RPS19;MYBBP1A;RPL35A                                                            | 13.38              | 0                   | 0                |
| down   | GO:0006605 | 412               | protein targeting                                 | 2.31                  | 37                | RPLP2;RPL13A;RPLP1;RPL9;RPL18;RPL18A;RPL7;RPL10;RPL17;RPL4;RPL7A;RPL27;RPL21;RPS7;RPL30;RPS4X;RPL3;RPS13;RPL23A;RPS8;RPS28;RPL8;RPL6;RPL10A;RPL36;RPS10;RPS25;RPS6;RPL35;RPS15A;RPS20;RPS3A;RPL27A;RPL5;RPS3;RPS19;RPL35A                                      | 16.02              | 0                   | 0                |
| down   | GO:0006401 | 341               | RNA catabolic process                             | 1.91                  | 43                | RPLP2;RPL13A;RPLP1;RPL9;CSDE1;RPL18;RPL18A;RPL7;RPL10;RPL17;RPL4;RPL7A;RPL27;RPL21;RPS7;RPL30;RPS4X;RPL3;RPS13;RPL23A;RPS8;DDX5;RPS28;RPL8;RPL6;RPL10A;RPL36;RPS10;SERBP1;EIF3E;RPS25;RPS6;RPL35;RPS15A;RPS20;RPS3A;RPL27A;RPL5;RPS3;RPS19;EDC4;RPL35A;RPL29   | 22.50              | 0                   | 0                |
| down   | GO:0090150 | 313               | establishment of protein localization to membrane | 1.75                  | 37                | RPLP2;RPL13A;RPLP1;RPL9;RPL18;RPL18A;RPL7;RPL10;RPL17;RPL4;RPL7A;RPL27;RPL21;RPS7;RPL30;RPS4X;RPL3;RPS13;RPL23A;RPS8;RPS28;RPL8;RPL6;RPL10A;RPL36;RPS10;RPS25;RPS6;RPL35;RPS15A;RPS20;RPS3A;RPL27A;RPL5;RPS3;RPS19;RPL35A                                      | 21.09              | 0                   | 0                |
| down   | GO:0016072 | 236               | rRNA metabolic process                            | 1.32                  | 19                | RPL7;NAT10;NHP2;NPM3;RPL7A;RPL27;RPS7;RPS8;DDX47;RPS28;RPL10A;RPS6;RPL35;DDX21;NCL;RPL5;TRMT112;RPS19;RPL35A                                                                                                                                                   | 14.36              | 0                   | 0                |
| down   | GO:0006413 | 192               | translational initiation                          | 1.08                  | 43                | RPLP2;RPL13A;RPLP1;RPL9;RPL18;RPL18A;RPL7;RPL10;RPL17;RPL4;RPL7A;RPL27;RPL21;RPS7;RPL30;RPS4X;RPL3;RPS13;RPL23A;RPS8;RPS28;EIF3K;RPL8;RPL6;RPL10A;RPL36;RPS10;EIF3E;RPS25;EIF4G2;EIF3D;RPS6;RPL35;RPS15A;RPS20;RPS3A;RPL27A;RPL5;RPS3;DDX3X;RPS19;RPL35A;RPL29 | 39.95              | 0                   | 0                |
| down   | GO:0070972 | 137               | protein localization to endoplasmic reticulum     | 0.77                  | 37                | RPLP2;RPL13A;RPLP1;RPL9;RPL18;RPL18A;RPL7;RPL10;RPL17;RPL4;RPL7A;RPL27;RPL21;RPS7;RPL30;RPS4X;RPL3;RPS13;RPL23A;RPS8;RPS28;RPL8;RPL6;RPL10A;RPL36;RPS10;RPS25;RPS6;RPL35;RPS15A;RPS20;RPS3A;RPL27A;RPL5;RPS3;RPS19;RPL35A                                      | 48.18              | 0                   | 0                |
| down   | GO:0002181 | 92                | cytoplasmic translation                           | 0.52                  | 17                | RPL13A;RPLP1;RPL9;RPL18;RPL18A;RPL17;RPL30;RPS28;EIF3K;RPL8;RPL6;RPL10A;RPL36;EIF3E;EIF3D;EEF2;RPL35A                                                                                                                                                          | 32.96              | 0                   | 0                |

|      |            |     |                                                   |      |    |                                                                                                          |       |          |          |
|------|------------|-----|---------------------------------------------------|------|----|----------------------------------------------------------------------------------------------------------|-------|----------|----------|
| down | GO:0071826 | 245 | ribonucleoprotein complex subunit organization    | 1.37 | 17 | RPL13A;RPL10;BRX1;RPL3;RPL23A;RPS28;EIF3K;RPL6;RPS10;EIF3E;EIF3D;G3BP2;RBMX;RPL5;G3BP1;DDX3X;RPS19       | 12.38 | 2.31E-14 | 2.18E-12 |
| down | GO:0034470 | 367 | ncRNA processing                                  | 2.06 | 18 | RPL7;NAT10;NHP2;NPM3;RPL7A;RPL27;RPS7;RPS8;DDX47;RPS28;RPL10A;RPS6;RPL35;DDX21;RPL5;TRMT112;RPS19;RPL35A | 8.75  | 1.42E-12 | 1.20E-10 |
| down | GO:0010608 | 486 | posttranscriptional regulation of gene expression | 2.72 | 17 | RPL13A;RPL10;TYMS;CAPRIN1;RPS4X;PABPC1;DDX5;EIF3K;SERBP1;EIF3E;EIF4G2;EIF3D;EEF2;NCL;RPL5;RPS3;DDX3X     | 6.24  | 1.24E-09 | 9.61E-08 |
| down | GO:0034248 | 385 | regulation of cellular amide metabolic process    | 2.16 | 15 | RPL13A;RPL10;TYMS;CAPRIN1;RPS4X;PABPC1;EIF3K;EIF3E;EIF4G2;EIF3D;EEF2;NCL;RPL5;RPS3;DDX3X                 | 6.95  | 3.11E-09 | 2.21E-07 |

- <sup>a</sup> numbers of genes in the category
- <sup>b</sup> expected number of genes for a statistically significant enrichment
- <sup>c</sup> number of protein hits demonstrated by this study differentially expressed in quercetin-treated k562 cells
- <sup>d</sup> enrichment ratio according to the WEBGestalt algorithm
- <sup>e</sup> The p value of the new version WebGestalt is calculated from R. Zero means it is smaller than 2.220446E-16, the smallest positive floating-point number in R on the machine
