# Supplementary material for: Proteomic Analysis of Quercetin-Treated K562 Cells
Source: MDPI journal article supplement (doi:10.3390/ijms21010032), 2019-12-19
Supplement: s1 [file s1]

Table S1

| Protein IDs <sup>a</sup>    | Majority protein IDs <sup>b</sup> | Protein names                                                                                                             | Gene names              | Peptides <sup>c</sup> | Razor + unique peptides <sup>d</sup> | Unique peptides <sup>e</sup> | Identification type <sup>f</sup> |          |          |          |          |          |          |            |            |          | Sequence coverage [%] <sup>g</sup> | Mol. weight [kDa] <sup>h</sup> | Q-value <sup>i</sup> | Score <sup>j</sup> |      |        |
|-----------------------------|-----------------------------------|---------------------------------------------------------------------------------------------------------------------------|-------------------------|-----------------------|--------------------------------------|------------------------------|----------------------------------|----------|----------|----------|----------|----------|----------|------------|------------|----------|------------------------------------|--------------------------------|----------------------|--------------------|------|--------|
|                             |                                   |                                                                                                                           |                         |                       |                                      |                              | FRW1                             | FRW1a    | FRW2     | FRW2a    | FRW3     | FRW3a    | REV1     | REV1a      | REV2       | REV2a    |                                    |                                |                      |                    | REV3 | REV3a  |
| P49588                      | P49588                            | Alanine-tRNA ligase, cytoplasmic                                                                                          | AARS                    | 43                    | 43                                   | 43                           | By MS/MS                         | By MS/MS | By MS/MS | By MS/MS | By MS/MS | By MS/MS | By MS/MS | By MS/MS   | By MS/MS   | By MS/MS | By MS/MS                           | By MS/MS                       | 57,3                 | 106,81             | 0    | 323,31 |
| Q5JT29                      | Q5JT29                            | Alanine-tRNA ligase, mitochondrial                                                                                        | AARS2                   | 7                     | 7                                    | 7                            |                                  | By MS/MS |          |            |            | By MS/MS | By MS/MS                           | By MS/MS                       | 13,9                 | 107,34             | 0    | 16,36  |
| Q9NRN7                      | Q9NRN7                            | L-amino acid-pyruvate-semialdehyde dehydrogenase-phosphopantetheinyl transferase                                          | AASDHPPT                | 8                     | 8                                    | 8                            | By MS/MS                         | By MS/MS | By MS/MS | By MS/MS | By MS/MS |          | By MS/MS | By MS/MS   | By MS/MS   | By MS/MS | By MS/MS                           | By MS/MS                       | 24,9                 | 35,78              | 0    | 103,68 |
| P61221                      | P61221                            | ATP-binding cassette sub-family E member 1                                                                                | ABCE1                   | 22                    | 22                                   | 22                           | By MS/MS                         | By MS/MS | By MS/MS | By MS/MS | By MS/MS | By MS/MS | By MS/MS | By MS/MS   | By MS/MS   | By MS/MS | By MS/MS                           | By MS/MS                       | 42,6                 | 67,31              | 0    | 323,31 |
| Q8NE71                      | Q8NE71                            | ATP-binding cassette sub-family F member 1                                                                                | ABCF1                   | 14                    | 14                                   | 14                           | By MS/MS                         | By MS/MS | By MS/MS | By MS/MS | By MS/MS | By MS/MS | By MS/MS | By MS/MS   | By MS/MS   | By MS/MS | By MS/MS                           | By MS/MS                       | 18,5                 | 95,93              | 0    | 226,51 |
| Q9UG63                      | Q9UG63                            | ATP-binding cassette sub-family F member 2                                                                                | ABCF2                   | 7                     | 7                                    | 7                            |                                  | By MS/MS |          |          |          | By MS/MS | By MS/MS | By MS/MS   | By MS/MS   | By MS/MS | By MS/MS                           | By MS/MS                       | 14,4                 | 71,29              | 0    | 11,27  |
| Q9NUJ1                      | Q9NUJ1                            | Mycophenolic acid acyl-glucuronide esterase, mitochondrial                                                                | ABHD10                  | 4                     | 4                                    | 4                            | By MS/MS                         | By MS/MS | By MS/MS | By MS/MS | By MS/MS | By MS/MS |          | By MS/MS   | By MS/MS   | By MS/MS |                                    | By MS/MS                       | 20,3                 | 33,93              | 0    | 49,28  |
| Q96IU4                      | Q96IU4                            | Alpha/beta hydrolase domain-containing protein 14B                                                                        | ABHD14B                 | 6                     | 6                                    | 6                            | By MS/MS                         | By MS/MS | By MS/MS | By MS/MS | By MS/MS | By MS/MS | By MS/MS | By MS/MS   | By MS/MS   | By MS/MS | By MS/MS                           | By MS/MS                       | 39,5                 | 22,35              | 0    | 39,01  |
| P09110                      | P09110                            | 3-ketoacyl-CoA thiolase, peroxisomal                                                                                      | ACAA1                   | 4                     | 4                                    | 4                            | By MS/MS                         | By MS/MS | By MS/MS | By MS/MS | By MS/MS | By MS/MS | By MS/MS |            | By MS/MS   | By MS/MS |                                    | By MS/MS                       | 18,6                 | 44,29              | 0    | 31,01  |
| Q13085                      | Q13085                            | Acetyl-CoA carboxylase 1;Biotin carboxylase                                                                               | ACACA                   | 48                    | 48                                   | 41                           | By MS/MS                         | By MS/MS | By MS/MS | By MS/MS | By MS/MS | By MS/MS | By MS/MS | By MS/MS   | By MS/MS   | By MS/MS | By MS/MS                           | By MS/MS                       | 30,9                 | 265,55             | 0    | 132,96 |
| P11310                      | P11310                            | Medium-chain specific acyl-CoA dehydrogenase, mitochondrial                                                               | ACADM                   | 9                     | 9                                    | 9                            | By MS/MS                         | By MS/MS | By MS/MS | By MS/MS | By MS/MS | By MS/MS | By MS/MS |            | By MS/MS   | By MS/MS |                                    |                                | 31,1                 | 46,59              | 0    | 323,31 |
| P49748                      | P49748                            | Very long-chain specific acyl-CoA dehydrogenase, mitochondrial                                                            | ACADVL                  | 13                    | 13                                   | 13                           | By MS/MS                         | By MS/MS | By MS/MS | By MS/MS | By MS/MS | By MS/MS | By MS/MS | By MS/MS   |            |          | By MS/MS                           | By MS/MS                       | 30,2                 | 70,39              | 0    | 69,83  |
| P24752                      | P24752                            | Acetyl-CoA acetyltransferase, mitochondrial                                                                               | ACAT1                   | 24                    | 24                                   | 24                           | By MS/MS                         | By MS/MS | By MS/MS | By MS/MS | By MS/MS | By MS/MS | By MS/MS | By MS/MS   | By MS/MS   | By MS/MS | By MS/MS                           | By MS/MS                       | 61,8                 | 45,20              | 0    | 323,31 |
| Q9BW01                      | Q9BW01                            | Acetyl-CoA acetyltransferase, cytosolic                                                                                   | ACAT2                   | 12                    | 12                                   | 12                           | By MS/MS                         | By MS/MS | By MS/MS | By MS/MS | By MS/MS | By MS/MS | By MS/MS | By MS/MS   | By MS/MS   | By MS/MS |                                    |                                | 65,7                 | 41,35              | 0    | 109,25 |
| Q9H3P7                      | Q9H3P7                            | Golgi resident protein GCP60                                                                                              | ACBD3                   | 5                     | 5                                    | 5                            | By MS/MS                         | By MS/MS | By MS/MS | By MS/MS | By MS/MS | By MS/MS | By MS/MS | By MS/MS   | By MS/MS   | By MS/MS | By MS/MS                           | By MS/MS                       | 12,9                 | 60,59              | 0    | 142,92 |
| P53396                      | P53396                            | ATP-citrate synthase                                                                                                      | ACLY                    | 49                    | 49                                   | 49                           | By MS/MS                         | By MS/MS | By MS/MS | By MS/MS | By MS/MS | By MS/MS | By MS/MS | By MS/MS   | By MS/MS   | By MS/MS | By MS/MS                           | By MS/MS                       | 53,4                 | 120,84             | 0    | 323,31 |
| P21399                      | P21399                            | Cytoplasmic aconitase hydratase                                                                                           | ACO1                    | 14                    | 14                                   | 14                           | By MS/MS                         | By MS/MS | By MS/MS | By MS/MS | By MS/MS | By MS/MS | By MS/MS | By MS/MS   | By MS/MS   | By MS/MS | By MS/MS                           | By MS/MS                       | 27,7                 | 98,40              | 0    | 199,29 |
| Q99798                      | Q99798                            | Aconitase hydratase, mitochondrial                                                                                        | ACO2                    | 24                    | 24                                   | 24                           | By MS/MS                         | By MS/MS | By MS/MS | By MS/MS | By MS/MS | By MS/MS | By MS/MS | By MS/MS   | By MS/MS   | By MS/MS | By MS/MS                           | By MS/MS                       | 40,9                 | 85,42              | 0    | 210,75 |
| Q9NPJ3                      | Q9NPJ3                            | Acyl-coenzyme A thioesterase 13;Acyl-coenzyme A thioesterase 13, N-terminally processed                                   | ACOT13                  | 6                     | 6                                    | 6                            | By MS/MS                         | By MS/MS | By MS/MS | By MS/MS | By MS/MS | By MS/MS | By MS/MS | By MS/MS   | By MS/MS   | By MS/MS | By MS/MS                           | By MS/MS                       | 46,4                 | 14,96              | 0    | 78,28  |
| O00154                      | O00154                            | Cytosolic acyl coenzyme A thioester hydrolase                                                                             | ACOT7                   | 7                     | 7                                    | 7                            | By MS/MS                         | By MS/MS | By MS/MS | By MS/MS | By MS/MS | By MS/MS | By MS/MS | By MS/MS   | By MS/MS   | By MS/MS | By MS/MS                           | By MS/MS                       | 25,8                 | 41,80              | 0    | 17,09  |
| Q9Y305                      | Q9Y305                            | Acyl-coenzyme A thioesterase 9, mitochondrial                                                                             | ACOT9                   | 4                     | 4                                    | 4                            |                                  | By MS/MS |          | By MS/MS   | By MS/MS   | By MS/MS | By MS/MS                           | By MS/MS                       | 11,6                 | 49,90              | 0    | 6,70   |
| P24666                      | P24666                            | Low molecular weight phosphotyrosine protein phosphatase                                                                  | ACP1                    | 9                     | 9                                    | 9                            | By MS/MS                         | By MS/MS | By MS/MS | By MS/MS | By MS/MS | By MS/MS | By MS/MS | By MS/MS   | By MS/MS   | By MS/MS | By MS/MS                           | By MS/MS                       | 67,7                 | 18,04              | 0    | 142,69 |
| O95573                      | O95573                            | Long-chain-fatty acid-CoA ligase 3                                                                                        | ACSL3                   | 13                    | 13                                   | 12                           | By MS/MS                         | By MS/MS | By MS/MS | By MS/MS | By MS/MS | By MS/MS | By MS/MS | By MS/MS   | By MS/MS   | By MS/MS | By MS/MS                           | By MS/MS                       | 27,1                 | 80,42              | 0    | 42,24  |
| O60488                      | O60488                            | Long-chain-fatty acid-CoA ligase 4                                                                                        | ACSL4                   | 6                     | 5                                    | 5                            | By MS/MS                         | By MS/MS | By MS/MS | By MS/MS | By MS/MS | By MS/MS | By MS/MS | By matchin | By matchin | By MS/MS | By MS/MS                           | By MS/MS                       | 15,8                 | 79,19              | 0    | 15,01  |
| Q53F22                      | Q53F22                            | Acyl-coenzyme A synthetase ACSM3, mitochondrial                                                                           | ACSM3                   | 11                    | 11                                   | 11                           | By MS/MS                         | By MS/MS | By MS/MS |          | By MS/MS | By MS/MS | By MS/MS |            |            | By MS/MS | By MS/MS                           | By MS/MS                       | 29,2                 | 66,15              | 0    | 20,90  |
| P68032;P63267;P68133;P62736 | P68032;P63267;P68133;P62736       | Actin, alpha cardiac muscle 1;Actin, gamma-enteric smooth muscle;Actin, alpha skeletal muscle;Actin, aortic smooth muscle | ACTC1;ACTG2;ACTA1;ACTA2 | 23                    | 2                                    | 2                            | By MS/MS                         | By MS/MS | By MS/MS | By MS/MS | By MS/MS | By MS/MS | By MS/MS | By MS/MS   | By MS/MS   | By MS/MS | By matchin                         | By MS/MS                       | 40,8                 | 42,02              | 0    | 15,51  |
| Q96019                      | Q96019                            | Actin-like protein 6A                                                                                                     | ACTL6A                  | 7                     | 7                                    | 7                            | By MS/MS                         | By MS/MS | By MS/MS | By MS/MS | By MS/MS | By MS/MS | By MS/MS | By MS/MS   | By MS/MS   |          | By MS/MS                           | By MS/MS                       | 27,0                 | 47,46              | 0    | 54,62  |
| P12814                      | P12814                            | Alpha-actinin-1                                                                                                           | ACTN1                   | 32                    | 12                                   | 10                           | By MS/MS                         | By MS/MS | By MS/MS | By MS/MS | By MS/MS | By MS/MS | By MS/MS | By MS/MS   | By MS/MS   | By MS/MS | By MS/MS                           | By MS/MS                       | 42,7                 | 103,06             | 0    | 143,51 |
| O43707;Q9H254               | O43707                            | Alpha-actinin-4                                                                                                           | ACTN4                   | 65                    | 65                                   | 45                           | By MS/MS                         | By MS/MS | By MS/MS | By MS/MS | By MS/MS | By MS/MS | By MS/MS | By MS/MS   | By MS/MS   | By MS/MS | By MS/MS                           | By MS/MS                       | 76,7                 | 104,85             | 0    | 323,31 |
| P61163;P42025               | P61163;P42025                     | Alpha-centractin;Beta-centractin                                                                                          | ACTR1A;ACTR1B           | 9                     | 9                                    | 9                            | By MS/MS                         | By MS/MS | By MS/MS | By MS/MS | By MS/MS | By MS/MS | By MS/MS | By MS/MS   |            | By MS/MS | By MS/MS                           | By MS/MS                       | 40,2                 | 42,61              | 0    | 88,36  |
| P61160                      | P61160                            | Actin-related protein 2                                                                                                   | ACTR2                   | 11                    | 11                                   | 11                           | By MS/MS                         | By MS/MS | By MS/MS | By MS/MS | By MS/MS | By MS/MS | By MS/MS | By MS/MS   | By MS/MS   | By MS/MS |                                    | By MS/MS                       | 40,1                 | 44,76              | 0    | 97,91  |
| P61158;Q9C0K3;Q9P1U1        | P61158                            | Actin-related protein 3                                                                                                   | ACTR3                   | 11                    | 11                                   | 11                           | By MS/MS                         | By MS/MS | By MS/MS | By MS/MS | By MS/MS | By MS/MS | By MS/MS | By MS/MS   |            |          | By MS/MS                           | By MS/MS                       | 40,4                 | 47,37              | 0    | 57,20  |
| Q03154                      | Q03154                            | Aminoacylase-1                                                                                                            | ACY1                    | 6                     | 6                                    | 6                            |                                  | By MS/MS |            |            |          | By MS/MS                           |                                | 24,8                 | 45,88              | 0    | 36,72  |
| P07311                      | P07311                            | Acylphosphatase-1                                                                                                         | ACYP1                   | 5                     | 5                                    | 5                            | By MS/MS                         | By MS/MS | By MS/MS | By MS/MS | By MS/MS | By MS/MS | By MS/MS | By MS/MS   | By MS/MS   | By MS/MS | By MS/MS                           | By MS/MS                       | 55,6                 | 11,26              | 0    | 29,51  |
| P35611                      | P35611                            | Alpha-adducin                                                                                                             | ADD1                    | 7                     | 7                                    | 7                            | By MS/MS                         | By MS/MS | By MS/MS | By MS/MS | By MS/MS | By MS/MS | By MS/MS |            |            |          | By MS/MS                           | By MS/MS                       | 15,9                 | 80,95              | 0    | 49,60  |
| P11766                      | P11766                            | Alcohol dehydrogenase class-3                                                                                             | ADH5                    | 10                    | 10                                   | 10                           | By MS/MS                         | By MS/MS | By MS/MS | By MS/MS | By MS/MS | By MS/MS | By MS/MS | By MS/MS   | By MS/MS   | By MS/MS | By MS/MS                           | By MS/MS                       | 39,6                 | 39,72              | 0    | 103,44 |
| Q9BV57                      | Q9BV57                            | 1,2-dihydroxy-3-keto-5-methylthiopentene dioxigenase                                                                      | ADI1                    | 9                     | 9                                    | 9                            | By MS/MS                         | By MS/MS | By MS/MS | By MS/MS | By MS/MS | By MS/MS | By MS/MS | By MS/MS   |            | By MS/MS | By MS/MS                           | By MS/MS                       | 60,3                 | 21,50              | 0    | 31,20  |
| P55263                      | P55263                            | Adenosine kinase                                                                                                          | ADK                     | 9                     | 9                                    | 9                            | By MS/MS                         | By MS/MS | By MS/MS | By MS/MS | By MS/MS | By MS/MS | By MS/MS | By MS/MS   |            |          | By MS/MS                           | By MS/MS                       | 43,6                 | 40,55              | 0    | 111,68 |
| P30566                      | P30566                            | Adenylosuccinate lyase                                                                                                    | ADSL                    | 10                    | 10                                   | 10                           | By MS/MS                         | By MS/MS | By MS/MS | By MS/MS | By MS/MS | By MS/MS | By MS/MS |            | By MS/MS   |          | By MS/MS                           | By MS/MS                       | 34,3                 | 54,89              | 0    | 30,04  |
| P30520                      | P30520                            | Adenylosuccinate synthetase isozyme 2                                                                                     | ADSS                    | 11                    | 11                                   | 11                           | By MS/MS                         | By MS/MS | By MS/MS | By MS/MS | By MS/MS | By MS/MS | By MS/MS |            |            |          | By MS/MS                           | By MS/MS                       | 33,8                 | 50,10              | 0    | 180,55 |
| Q9Y4W6                      | Q9Y4W6                            | AFG3-like protein 2                                                                                                       | AFG3L2                  | 12                    | 12                                   | 11                           | By MS/MS                         | By MS/MS | By MS/MS | By MS/MS | By MS/MS | By MS/MS | By MS/MS | By MS/MS   | By MS/MS   | By MS/MS | By MS/MS                           | By MS/MS                       | 23,3                 | 88,58              | 0    | 221,02 |
| Q53H12                      | Q53H12                            | Acylglycerol kinase, mitochondrial                                                                                        | AGK                     | 4                     | 4                                    | 4                            | By MS/MS                         | By MS/MS | By MS/MS | By MS/MS | By MS/MS | By MS/MS | By MS/MS |            |            |          | By MS/MS                           | By MS/MS                       | 15,6                 | 47,14              | 0    | 10,35  |
| P35573                      | P35573                            | Glycogen debranching enzyme;4-alpha-glucanotransferase;Amylo-alpha-1,6-glucosidase                                        | AGL                     | 8                     | 8                                    | 8                            | By MS/MS                         | By MS/MS | By MS/MS | By MS/MS | By MS/MS | By MS/MS | By MS/MS | By MS/MS   | By MS/MS   | By MS/MS |                                    | By MS/MS                       | 8,4                  | 174,76             | 0    | 15,28  |
| O00116                      | O00116                            | Alkyl(dihydroxyacetone)phosphate synthase, peroxisomal                                                                    | AGPS                    | 14                    | 14                                   | 14                           | By MS/MS                         | By MS/MS | By MS/MS | By MS/MS | By MS/MS | By MS/MS | By MS/MS | By MS/MS   | By MS/MS   | By MS/MS | By MS/MS                           | By MS/MS                       | 28,9                 | 72,91              | 0    | 145,80 |
| P23526                      | P23526                            | Adenosylhomocysteinase                                                                                                    | AHCY                    | 19                    | 19                                   | 19                           | By MS/MS                         | By MS/MS | By MS/MS | By MS/MS | By MS/MS | By MS/MS | By MS/MS | By MS/MS   | By MS/MS   | By MS/MS | By MS/MS                           | By MS/MS                       | 42,4                 | 47,72              | 0    | 198,20 |
| O95433                      | O95433                            | Activator of 90 kDa heat shock protein ATPase homolog 1                                                                   | AHSA1                   | 7                     | 7                                    | 7                            | By MS/MS                         | By MS/MS | By MS/MS | By MS/MS | By MS/MS | By MS/MS | By MS/MS | By MS/MS   | By MS/MS   | By MS/MS | By MS/MS                           | By MS/MS                       | 22,8                 | 38,27              | 0    | 19,20  |
| O95831                      | O95831                            | Apoptosis-inducing factor 1, mitochondrial                                                                                | AIFM1                   | 14                    | 14                                   | 14                           | By MS/MS                         | By MS/MS | By MS/MS | By MS/MS | By MS/MS | By MS/MS | By MS/MS | By MS/MS   | By MS/MS   | By MS/MS | By MS/MS                           | By MS/MS                       | 35,1                 | 66,90              | 0    | 138,42 |
| Q12904                      | Q12904                            | Aminoacyl tRNA synthase complex-interacting multifunctional protein 1;Endothelial monocyte-activating polypeptide 2       | AIMP1                   | 11                    | 11                                   | 11                           | By MS/MS                         | By MS/MS | By MS/MS | By MS/MS | By MS/MS | By MS/MS | By MS/MS | By MS/MS   | By MS/MS   | By MS/MS | By MS/MS                           | By MS/MS                       | 58,3                 | 34,35              |      |        |



|               |        |                                                                                                                                                                 |           |    |    |    |          |          |          |          |          |          |          |          |          |          |          |          |          |          |      |        |   |        |
|---------------|--------|-----------------------------------------------------------------------------------------------------------------------------------------------------------------|-----------|----|----|----|----------|----------|----------|----------|----------|----------|----------|----------|----------|----------|----------|----------|----------|----------|------|--------|---|--------|
| P25705        | P25705 | ATP synthase subunit alpha, mitochondrial                                                                                                                       | ATP5A1    | 33 | 33 | 33 | By MS/MS | 66,0 | 59,75  | 0 | 323,31 |
| P06576        | P06576 | ATP synthase subunit beta, mitochondrial                                                                                                                        | ATP5B     | 29 | 29 | 29 | By MS/MS | 73,5 | 56,56  | 0 | 323,31 |
| P36542        | P36542 | ATP synthase subunit gamma, mitochondrial                                                                                                                       | ATP5C1    | 8  | 8  | 8  | By MS/MS | 28,5 | 33,00  | 0 | 88,05  |
| P24539        | P24539 | ATP synthase [F0] complex subunit B1, mitochondrial                                                                                                             | ATP5F1    | 15 | 15 | 15 | By MS/MS | 49,6 | 28,91  | 0 | 86,07  |
| Q75947        | Q75947 | ATP synthase subunit d, mitochondrial                                                                                                                           | ATP5H     | 10 | 10 | 10 | By MS/MS | 72,0 | 18,49  | 0 | 72,36  |
| P56134        | P56134 | ATP synthase subunit f, mitochondrial                                                                                                                           | ATP5J2    | 6  | 6  | 6  | By MS/MS | 52,1 | 10,92  | 0 | 52,21  |
| Q75964        | Q75964 | ATP synthase subunit g, mitochondrial                                                                                                                           | ATP5L     | 7  | 7  | 7  | By MS/MS | 59,2 | 11,43  | 0 | 35,56  |
| P48047        | P48047 | ATP synthase subunit O, mitochondrial                                                                                                                           | ATP5O     | 13 | 13 | 13 | By MS/MS | 67,6 | 23,28  | 0 | 223,90 |
| P61421        | P61421 | V-type proton ATPase subunit d1                                                                                                                                 | ATP6V0D1  | 5  | 5  | 5  |          |          |          |          |          | By MS/MS | By MS/MS |          |          |          | By MS/MS | By MS/MS |          |          | 21,9 | 40,33  | 0 | 6,47   |
| P38606        | P38606 | V-type proton ATPase catalytic subunit A                                                                                                                        | ATP6V1A   | 14 | 14 | 14 | By MS/MS | 35,5 | 68,30  | 0 | 141,36 |
| P21281;P15313 | P21281 | V-type proton ATPase subunit B, brain isoform                                                                                                                   | ATP6V1B2  | 14 | 14 | 14 | By MS/MS |          | By MS/MS | By MS/MS |          | 44,2 | 56,50  | 0 | 127,74 |
| P21283        | P21283 | V-type proton ATPase subunit C 1                                                                                                                                | ATP6V1C1  | 7  | 7  | 7  | By MS/MS | 24,1 | 43,94  | 0 | 67,82  |
| Q16864        | Q16864 | V-type proton ATPase subunit F                                                                                                                                  | ATP6V1F   | 4  | 4  | 4  | By MS/MS | By MS/MS |          |          |          | By MS/MS |          | By MS/MS | 42,9 | 13,37  | 0 | 15,19  |
| Q75348;Q95670 | Q75348 | V-type proton ATPase subunit G 1                                                                                                                                | ATP6V1G1  | 5  | 5  | 5  | By MS/MS | 33,1 | 13,76  | 0 | 149,05 |
| Q9U112        | Q9U112 | V-type proton ATPase subunit H                                                                                                                                  | ATP6V1H   | 4  | 4  | 4  | By MS/MS | By MS/MS | By MS/MS |          |          | By MS/MS | By MS/MS |          |          |          |          | By MS/MS | By MS/MS |          | 12,4 | 55,88  | 0 | 15,31  |
| Q9UBB4        | Q9UBB4 | Ataxin-10                                                                                                                                                       | ATXN10    | 10 | 10 | 10 | By MS/MS | 32,8 | 53,49  | 0 | 323,31 |
| Q8VWM7        | Q8VWM7 | Ataxin-2-like protein                                                                                                                                           | ATXN2L    | 7  | 7  | 7  | By MS/MS |          |          |          |          |          |          | 10,3 | 113,37 | 0 | 21,26  |
| Q95816        | Q95816 | BAG family molecular chaperone regulator 2                                                                                                                      | BAG2      | 10 | 10 | 10 | By MS/MS |          | 55,9 | 23,77  | 0 | 88,73  |
| P46379        | P46379 | Large proline-rich protein BAG6                                                                                                                                 | BAG6      | 12 | 12 | 12 | By MS/MS | 19,5 | 119,41 | 0 | 47,95  |
| Q07812        | Q07812 | Apoptosis regulator BAX                                                                                                                                         | BAX       | 7  | 7  | 7  | By MS/MS | 43,2 | 21,18  | 0 | 134,08 |
| P51572        | P51572 | B-cell receptor-associated protein 31                                                                                                                           | BCAP31    | 6  | 6  | 6  | By MS/MS | 27,6 | 27,99  | 0 | 163,64 |
| Q75934        | Q75934 | Pre-mRNA-splicing factor SPF27                                                                                                                                  | BCAS2     | 6  | 6  | 6  | By MS/MS | 44,4 | 26,13  | 0 | 76,31  |
| P54687        | P54687 | Branched-chain-amino-acid aminotransferase, cytosolic                                                                                                           | BCAT1     | 8  | 8  | 8  | By MS/MS | 26,2 | 42,97  | 0 | 137,95 |
| Q9P287        | Q9P287 | BRCA2 and CDKN1A-interacting protein                                                                                                                            | BCCIP     | 5  | 5  | 5  | By MS/MS | 25,8 | 35,98  | 0 | 12,68  |
| Q9BKX5        | Q9BKX5 | Bcl-2-like protein 13                                                                                                                                           | BCL2L13   | 4  | 4  | 4  | By MS/MS | 13,2 | 52,72  | 0 | 14,03  |
| P55957        | P55957 | BH3-interacting domain death agonist;BH3-interacting domain death agonist p15;BH3-interacting domain death agonist p13;BH3-interacting domain death agonist p11 | BID       | 10 | 10 | 10 | By MS/MS | 61,0 | 21,99  | 0 | 161,22 |
| Q9NR09        | Q9NR09 | Baculoviral IAP repeat-containing protein 6                                                                                                                     | BIRC6     | 5  | 5  | 5  | By MS/MS |          | By MS/MS |          |          |          |          |          |          | 1,8  | 530,25 | 0 | 18,99  |
| Q13867        | Q13867 | Bleomycin hydrolase                                                                                                                                             | BLMH      | 8  | 8  | 8  | By MS/MS |          |          |          | By MS/MS | By MS/MS |          | 21,5 | 52,56  | 0 | 15,02  |
| P53004        | P53004 | Biliverdin reductase A                                                                                                                                          | BLVRA     | 13 | 13 | 13 | By MS/MS | 51,7 | 33,43  | 0 | 59,81  |
| P30043        | P30043 | Flavin reductase (NADPH)                                                                                                                                        | BLVRB     | 17 | 17 | 17 | By MS/MS | 74,3 | 22,12  | 0 | 323,31 |
| Q9H3K6        | Q9H3K6 | BolA-like protein 2                                                                                                                                             | BOLA2     | 6  | 6  | 6  | By MS/MS | 74,4 | 10,12  | 0 | 19,46  |
| Q95861        | Q95861 | 3[2],5-bisphosphate nucleotidase 1                                                                                                                              | BPNT1     | 9  | 9  | 9  | By MS/MS | 36,4 | 33,39  | 0 | 40,26  |
| Q6PJG6        | Q6PJG6 | BRCA1-associated ATM activator 1                                                                                                                                | BRAT1     | 6  | 6  | 6  | By MS/MS |          |          |          | By MS/MS |          |          | 13,0 | 88,12  | 0 | 29,66  |
| Q8TDN6        | Q8TDN6 | Ribosome biogenesis protein BRX1 homolog                                                                                                                        | BRX1      | 8  | 8  | 8  | By MS/MS |          |          | 25,8 | 41,40  | 0 | 15,23  |
| Q5VW32        | Q5VW32 | BR01 domain-containing protein BROX                                                                                                                             | BROX      | 6  | 6  | 6  | By MS/MS |          |          |          | By MS/MS | By MS/MS |          | 23,8 | 46,48  | 0 | 63,67  |
| P35613        | P35613 | Basigin                                                                                                                                                         | BSG       | 7  | 7  | 7  | By MS/MS |          |          |          | By MS/MS | By MS/MS |          | 23,4 | 42,20  | 0 | 229,71 |
| P20290        | P20290 | Transcription factor BTF3                                                                                                                                       | BTF3      | 9  | 9  | 9  | By MS/MS | 63,1 | 22,17  | 0 | 147,84 |
| Q43684        | Q43684 | Mitotic checkpoint protein BUB3                                                                                                                                 | BUB3      | 11 | 11 | 11 | By MS/MS | 44,8 | 37,15  | 0 | 97,24  |
| P41223        | P41223 | Protein BUD31 homolog                                                                                                                                           | BUD31     | 4  | 4  | 4  | By MS/MS |          | By MS/MS |          |          | 33,3 | 17,00  | 0 | 5,33   |
| Q13895        | Q13895 | Bystin                                                                                                                                                          | BYSL      | 8  | 8  | 8  | By MS/MS |          |          |          | By MS/MS |          |          | 22,9 | 49,60  | 0 | 17,74  |
| Q7L1Q6        | Q7L1Q6 | Basic leucine zipper and W2 domain-containing protein 1                                                                                                         | BZW1      | 12 | 10 | 10 | By MS/MS |          | By MS/MS |          | By MS/MS | By MS/MS | By MS/MS | By MS/MS | 37,2 | 48,04  | 0 | 97,03  |
| Q9Y6E2        | Q9Y6E2 | Basic leucine zipper and W2 domain-containing protein 2                                                                                                         | BZW2      | 14 | 14 | 12 | By MS/MS | 41,3 | 48,16  | 0 | 187,69 |
| Q9H0W9        | Q9H0W9 | Ester hydrolase C11orf54                                                                                                                                        | C11orf54  | 4  | 4  | 4  | By MS/MS |          | By MS/MS | 18,1 | 35,12  | 0 | 11,31  |
| Q53FT3        | Q53FT3 | Protein Hikeshi                                                                                                                                                 | C11orf73  | 4  | 4  | 4  | By MS/MS | 22,8 | 21,63  | 0 | 11,55  |
| Q9Y224        | Q9Y224 | UPF0568 protein C14orf166                                                                                                                                       | C14orf166 | 8  | 8  | 8  | By MS/MS | 41,4 | 28,07  | 0 | 212,95 |
| Q07021        | Q07021 | Complement component 1 Qsubcomponent-binding protein, mitochondrial                                                                                             | C1QB      | 10 | 10 | 10 | By MS/MS | 43,3 | 31,36  | 0 | 323,31 |
| P30042        | P30042 | ES1 protein homolog, mitochondrial                                                                                                                              | C21orf33  | 7  | 7  | 7  | By MS/MS | 43,3 | 28,17  | 0 | 35,88  |
| Q9BUH6        | Q9BUH6 | Protein PAXX                                                                                                                                                    | C9orf142  | 6  | 6  | 6  | By MS/MS |          |          |          | 41,7 | 21,64  | 0 | 13,36  |
| Q5T6V5        | Q5T6V5 | UPF0553 protein C9orf64                                                                                                                                         | C9orf64   | 5  | 5  | 5  | By MS/MS | By MS/MS |          | By MS/MS |          | By MS/MS |          | By MS/MS | By MS/MS | By MS/MS | By MS/MS |          | By MS/MS |          | 19,9 | 39,03  | 0 | 12,30  |
| P35219        | P35219 | Carbonic anhydrase-related protein                                                                                                                              | CA8       | 7  | 7  | 7  | By MS/MS | 36,2 | 32,97  | 0 | 24,38  |
| Q9Y376        | Q9Y376 | Calcium-binding protein 39                                                                                                                                      | CAB39     | 12 | 12 | 11 | By MS/MS | 46,6 | 39,87  | 0 | 23,86  |
| Q9HB71        | Q9HB71 | Calcyclin-binding protein                                                                                                                                       | CACYPB    | 17 | 17 | 17 | By MS/MS | 69,7 | 26,21  | 0 | 301,40 |
| P27708        | P27708 | CAD protein;Glutamine-dependent carbamoyl-phosphate synthase;Aspartate carbamoyltransferase;Dihydroorotase                                                      | CAD       | 56 | 56 | 56 | By MS/MS | 41,0 | 242,98 | 0 | 323,31 |
| P05937;P22676 | P05937 | Calbindin                                                                                                                                                       | CALB1     | 5  | 5  | 5  |          | By MS/MS |          |          |          | By MS/MS | By MS/MS |          | By MS/MS | 24,9 | 30,03  | 0 | 33,86  |
| P27797        | P27797 | Calreticulin                                                                                                                                                    | CALR      | 18 | 18 | 18 | By MS/MS | 60,7 | 48,14  | 0 | 280,06 |
| Q86VP6;Q75155 | Q86VP6 | Cullin-associated NEDD8-dissociated protein 1                                                                                                                   | CAN01     | 33 | 33 | 33 | By MS/MS | By MS/MS | By MS/MS | By MS/MS | By MS/   |          |          |          |          |          |          |          |          |          |      |        |   |        |

[illegible]

[illegible]

[illegible]

|                      |               |                                                                                                                                  |                 |     |     |     |          |          |          |          |          |          |          |          |          |          |          |          |          |          |          |          |          |        |        |        |        |
|----------------------|---------------|----------------------------------------------------------------------------------------------------------------------------------|-----------------|-----|-----|-----|----------|----------|----------|----------|----------|----------|----------|----------|----------|----------|----------|----------|----------|----------|----------|----------|----------|--------|--------|--------|--------|
| P51452               | P51452        | Dual specificity protein phosphatase 3                                                                                           | DUSP3           | 5   | 5   | 5   | By MS/MS | By MS/MS | By MS/MS | By MS/MS |          | 38,9   | 20,48  | 0      | 16,16  |
| P33316               | P33316        | Deoxyuridine 5'-triphosphate nucleotidohydrolase, mitochondrial                                                                  | DUT             | 10  | 10  | 10  | By MS/MS | 54,4   | 26,56  | 0      | 188,78 |
| Q14204               | Q14204        | Cytoplasmic dynein 1 heavy chain 1                                                                                               | DYNC1H1         | 117 | 117 | 117 | By MS/MS | 35,6   | 532,40 | 0      | 323,31 |
| Q13409               | Q13409        | Cytoplasmic dynein 1 intermediate chain 2                                                                                        | DYNC1I2         | 4   | 4   | 4   | By MS/MS | 11,9   | 71,46  | 0      | 12,52  |
| Q9V6G9               | Q9V6G9        | Cytoplasmic dynein 1 light intermediate chain 1                                                                                  | DYNC1I1         | 11  | 11  | 11  | By MS/MS | 31,5   | 56,58  | 0      | 95,75  |
| P63167               | P63167        | Dynein light chain 1, cytoplasmic                                                                                                | DYNLL1          | 6   | 6   | 3   | By MS/MS | 65,2   | 10,37  | 0      | 73,07  |
| Q96F12               | Q96F12        | Dynein light chain 2, cytoplasmic                                                                                                | DYNLL2          | 6   | 3   | 3   | By MS/MS | 65,2   | 10,35  | 0      | 17,14  |
| Q9NP97;Q8TF09        | Q9NP97;Q8TF09 | Dynein light chain roadblock-type 1; Dynein light chain roadblock-type 2                                                         | DYNLRB1;DYNLRB2 | 5   | 5   | 5   | By MS/MS | By MS/MS |          |          |          | By MS/MS |          | By MS/MS | 64,6   | 10,92  | 0      | 33,03  |
| P63172               | P63172        | Dynein light chain Tctex-type 1                                                                                                  | DYNLT1          | 4   | 4   | 4   | By MS/MS | 58,4   | 12,45  | 0      | 216,82 |
| Q99848               | Q99848        | Probable rRNA-processing protein EBP2                                                                                            | EBNA1BP2        | 4   | 4   | 4   |          |          |          |          |          | By MS/MS | 18,6   | 34,85  | 0      | 6,88   |
| Q13011               | Q13011        | Delta(3,5)-Delta(2,4)-dienoyl-CoA isomerase, mitochondrial                                                                       | ECH1            | 8   | 8   | 8   | By MS/MS | 34,1   | 35,82  | 0      | 249,82 |
| P30084               | P30084        | Enoyl-CoA hydratase, mitochondrial                                                                                               | ECHS1           | 7   | 7   | 7   | By MS/MS | 33,1   | 31,39  | 0      | 130,68 |
| P42126               | P42126        | Enoyl-CoA delta isomerase 1, mitochondrial                                                                                       | ECI1            | 8   | 8   | 8   | By MS/MS | 30,8   | 32,82  | 0      | 42,15  |
| O75521               | O75521        | Enoyl-CoA delta isomerase 2, mitochondrial                                                                                       | ECI2            | 6   | 6   | 6   | By MS/MS | 26,4   | 43,59  | 0      | 124,90 |
| Q5VVK3               | Q5VVK3        | Proteasome-associated protein ECM29 homolog                                                                                      | ECM29           | 38  | 38  | 38  | By MS/MS | 31,6   | 204,29 | 0      | 143,93 |
| Q6P2E9               | Q6P2E9        | Enhancer of mRNA-decapping protein 4                                                                                             | EDC4            | 9   | 9   | 9   | By MS/MS |          |          |          | By MS/MS | By MS/MS | By MS/MS |          |          |          |          |          | By MS/MS | By MS/MS | By MS/MS | By MS/MS | 10,8     | 151,66 | 0      | 30,52  |        |
| O60869               | O60869        | Endothelial differentiation-related factor 1                                                                                     | EDF1            | 4   | 4   | 4   | By MS/MS |          |          | By MS/MS | 29,7   | 16,37  | 0      | 14,88  |
| P68104;Q5VTE0;Q05639 | P68104;Q5VTE0 | Elongation factor 1-alpha 1; Putative elongation factor 1-alpha-like 3                                                           | EEF1A1;EEF1A1P5 | 28  | 28  | 28  | By MS/MS | 72,3   | 50,14  | 0      | 323,31 |
| P24534               | P24534        | Elongation factor 1-beta                                                                                                         | EEF1B2          | 8   | 8   | 8   | By MS/MS | 52,0   | 24,76  | 0      | 299,93 |
| P29692               | P29692        | Elongation factor 1-delta                                                                                                        | EEF1D           | 9   | 9   | 9   | By MS/MS | 34,2   | 31,12  | 0      | 202,67 |
| O43324               | O43324        | Eukaryotic translation elongation factor 1 epsilon-1                                                                             | EEF1E1          | 11  | 11  | 11  | By MS/MS | 64,4   | 19,81  | 0      | 24,16  |
| P26641               | P26641        | Elongation factor 1-gamma                                                                                                        | EEF1G           | 18  | 18  | 18  | By MS/MS | 46,5   | 50,12  | 0      | 217,83 |
| P13639               | P13639        | Elongation factor 2                                                                                                              | EEF2            | 56  | 56  | 55  | By MS/MS | 69,8   | 95,34  | 0      | 323,31 |
| Q96C19;Q9BUP0        | Q96C19        | EF-hand domain-containing protein D2                                                                                             | EFHD2           | 6   | 6   | 6   | By MS/MS | 31,2   | 26,70  | 0      | 24,45  |
| Q15029               | Q15029        | 116 kDa U5 small nuclear ribonucleoprotein component                                                                             | EFTUD2          | 35  | 34  | 34  | By MS/MS | 51,9   | 109,43 | 0      | 323,31 |
| Q9H4M9;Q9NZN3        | Q9H4M9        | EH domain-containing protein 1                                                                                                   | EH01            | 18  | 18  | 18  | By MS/MS |          |          |          |          | By MS/MS | By MS/MS | By MS/MS | By MS/MS | 44,4     | 60,63  | 0      | 44,96  |        |
| P41567               | P41567        | Eukaryotic translation initiation factor 1                                                                                       | EIF1            | 8   | 8   | 2   | By MS/MS | 77,0   | 12,73  | 0      | 233,85 |
| P47813;Q14602        | P47813;Q14602 | Eukaryotic translation initiation factor 1A, X-chromosomal; Eukaryotic translation initiation factor 1A, Y-chromosomal           | E1F1AX;E1F1AY   | 9   | 9   | 9   | By MS/MS | 71,5   | 16,46  | 0      | 90,62  |
| Q9BY44               | Q9BY44        | Eukaryotic translation initiation factor 2A; Eukaryotic translation initiation factor 2A, N-terminally processed                 | EIF2A           | 7   | 7   | 7   |          | By MS/MS |          |          |          |          | By MS/MS |          |          |          |          | 19,5     | 64,99  | 0      | 8,04   |        |
| Q14232               | Q14232        | Translation initiation factor eIF-2B subunit alpha                                                                               | EIF2B1          | 13  | 13  | 13  | By MS/MS | 60,0   | 33,71  | 0      | 243,50 |
| Q9UI10               | Q9UI10        | Translation initiation factor eIF-2B subunit delta                                                                               | EIF2B4          | 7   | 7   | 7   | By MS/MS | 20,1   | 57,56  | 0      | 26,34  |
| Q13144               | Q13144        | Translation initiation factor eIF-2B subunit epsilon                                                                             | EIF2B5          | 5   | 5   | 5   | By MS/MS | 11,2   | 80,38  | 0      | 21,82  |
| P05198               | P05198        | Eukaryotic translation initiation factor 2 subunit 1                                                                             | EIF2S1          | 20  | 20  | 20  | By MS/MS | 60,6   | 36,11  | 0      | 323,31 |
| P20042               | P20042        | Eukaryotic translation initiation factor 2 subunit 2                                                                             | EIF2S2          | 9   | 9   | 9   |          | By MS/MS | 36,3   | 38,39  | 0      | 116,16 |
| P41091;Q2VIR3        | P41091;Q2VIR3 | Eukaryotic translation initiation factor 2 subunit 3; Putative eukaryotic translation initiation factor 2 subunit 3-like protein | EIF2S3;EIF2S3L  | 14  | 14  | 14  | By MS/MS |          |          | By MS/MS | By MS/MS | By MS/MS | By MS/MS | 43,2   | 51,11  | 0      | 53,93  |
| Q14152               | Q14152        | Eukaryotic translation initiation factor 3 subunit A                                                                             | EIF3A           | 30  | 30  | 30  | By MS/MS | 25,4   | 166,57 | 0      | 190,17 |
| P55884               | P55884        | Eukaryotic translation initiation factor 3 subunit B                                                                             | EIF3B           | 28  | 28  | 28  | By MS/MS | 47,4   | 92,48  | 0      | 192,13 |
| Q99613;B5ME19        | Q99613;B5ME19 | Eukaryotic translation initiation factor 3 subunit C; Eukaryotic translation initiation factor 3 subunit C-like protein          | EIF3C;EIF3CL    | 13  | 13  | 13  | By MS/MS | 17,2   | 105,34 | 0      | 300,60 |
| Q15371               | Q15371        | Eukaryotic translation initiation factor 3 subunit D                                                                             | EIF3D           | 12  | 12  | 12  | By MS/MS |          |          | By MS/MS | By MS/MS | By MS/MS | By MS/MS | 29,7     | 63,97  | 0      | 291,41 |        |
| P60228               | P60228        | Eukaryotic translation initiation factor 3 subunit E                                                                             | EIF3E           | 17  | 17  | 17  | By MS/MS | 43,1   | 52,22  | 0      | 153,28 |
| Q00303               | Q00303        | Eukaryotic translation initiation factor 3 subunit F                                                                             | EIF3F           | 9   | 9   | 9   | By MS/MS | 40,9   | 37,56  | 0      | 128,29 |
| O75821               | O75821        | Eukaryotic translation initiation factor 3 subunit G                                                                             | EIF3G           | 10  | 10  | 10  | By MS/MS | 34,4   | 35,61  | 0      | 124,37 |
| Q15372               | Q15372        | Eukaryotic translation initiation factor 3 subunit H                                                                             | EIF3H           | 8   | 8   | 8   | By MS/MS | 30,4   | 39,93  | 0      | 32,15  |
| Q13347               | Q13347        | Eukaryotic translation initiation factor 3 subunit I                                                                             | EIF3I           | 12  | 12  | 12  | By MS/MS | 57,8   | 36,50  | 0      | 80,41  |
| O75822               | O75822        | Eukaryotic translation initiation factor 3 subunit J                                                                             | EIF3J           | 9   | 9   | 9   | By MS/MS | 39,9   | 29,06  | 0      | 125,90 |
| Q9UB05               | Q9UB05        | Eukaryotic translation initiation factor 3 subunit K                                                                             | EIF3K           | 10  | 10  | 10  | By MS/MS | 53,2   | 25,06  | 0      | 183,81 |
| Q9Y262               | Q9Y262        | Eukaryotic translation initiation factor 3 subunit L                                                                             | EIF3L           | 16  | 16  | 16  | By MS/MS |          |          | By MS/MS | By MS/MS | By MS/MS | By MS/MS | 37,6   | 66,73  | 0      | 323,31 |
| Q7L2H7               | Q7L2H7        | Eukaryotic translation initiation factor 3 subunit M                                                                             | EIF3M           | 17  | 17  | 17  | By MS/MS | 58,3   | 42,50  | 0      | 89,41  |
| P60842               | P60842        | Eukaryotic initiation factor 4                                                                                                   |                 |     |     |     |          |          |          |          |          |          |          |          |          |          |          |          |          |          |          |          |          |        |        |        |        |

|               |        |                                                                                                             |         |     |  |     |  |     |            |            |            |            |          |          |          |          |            |             |          |       |        |       |        |
|---------------|--------|-------------------------------------------------------------------------------------------------------------|---------|-----|--|-----|--|-----|------------|------------|------------|------------|----------|----------|----------|----------|------------|-------------|----------|-------|--------|-------|--------|
| Q8N766        | Q8N766 | ER membrane protein complex subunit 1                                                                       | EMC1    | 10  |  | 10  |  | 10  | By MS/MS   | By MS/MS   | By MS/MS   | By MS/MS   | By MS/MS | By MS/MS | By MS/MS |          | By MS/MS   |             |          | 15,8  | 111,76 | 0     | 59,03  |
| Q15006        | Q15006 | ER membrane protein complex subunit 2                                                                       | EMC2    | 5   |  | 5   |  | 5   | By MS/MS   | By MS/MS   | By MS/MS   | By MS/MS   | By MS/MS | By MS/MS | By MS/MS | By MS/MS | By MS/MS   | By MS/MS    | By MS/MS | 23,2  | 34,83  | 0     | 14,42  |
| Q9P012        | Q9P012 | ER membrane protein complex subunit 3                                                                       | EMC3    | 4   |  | 4   |  | 4   | By MS/MS   | By MS/MS   | By MS/MS   | By MS/MS   | By MS/MS | By MS/MS | By MS/MS |          | By MS/MS   | By MS/MS    | By MS/MS | 19,5  | 29,95  | 0     | 71,34  |
| Q9NPA0        | Q9NPA0 | ER membrane protein complex subunit 7                                                                       | EMC7    | 5   |  | 5   |  | 5   | By MS/MS   | By MS/MS   |            |            | By MS/MS | By MS/MS |          |          | By MS/MS   |             |          | 26,9  | 26,47  | 0     | 5,95   |
| P50402        | P50402 | Emerin                                                                                                      | EMD     | 6   |  | 6   |  | 6   | By MS/MS   | By MS/MS   | By MS/MS   | By MS/MS   | By MS/MS | By MS/MS |          |          | By MS/MS   | By MS/MS    |          | 33,1  | 28,99  | 0     | 323,31 |
| Q92979        | Q92979 | Ribosomal RNA small subunit methyltransferase NEP1                                                          | EMG1    | 6   |  | 6   |  | 6   | By MS/MS   |            | By MS/MS   | By MS/MS   | By MS/MS | By MS/MS |          |          | By MS/MS   | By MS/MS    | By MS/MS | 36,1  | 26,72  | 0     | 12,32  |
| P06733;P13929 | P06733 | Alpha-enolase                                                                                               | ENO1    | 38  |  | 38  |  | 35  | By MS/MS   | By MS/MS   | By MS/MS   | By MS/MS   | By MS/MS | By MS/MS | By MS/MS | By MS/MS | By MS/MS   | By MS/MS    | By MS/MS | 79,3  | 47,17  | 0     | 323,31 |
|               | P09104 | Gamma-enolase                                                                                               | ENO2    | 9   |  | 6   |  | 6   | By MS/MS   | By MS/MS   | By MS/MS   | By MS/MS   | By MS/MS | By MS/MS | By MS/MS | By MS/MS | By matchir | By matchir  | By MS/MS | 35,7  | 47,27  | 0     | 19,07  |
| Q9UHY7        | Q9UHY7 | Enolase-phosphatase E1                                                                                      | ENOPH1  | 5   |  | 5   |  | 5   | By MS/MS   | By MS/MS   | By MS/MS   | By MS/MS   | By MS/MS | By MS/MS |          |          | By MS/MS   | By MS/MS    | By MS/MS | 30,3  | 28,93  | 0     | 137,65 |
| P11171        | P11171 | Protein 4.1                                                                                                 | EPB41   | 6   |  | 6   |  | 6   | By MS/MS   | By MS/MS   | By MS/MS   | By MS/MS   | By MS/MS | By MS/MS |          |          | By MS/MS   |             | By MS/MS | 8,9   | 97,02  | 0     | 66,06  |
| P34913        | P34913 | Bifunctional epoxide hydrolase 2;Cytosolic epoxide hydrolase 2;Lipid-phosphate phosphatase                  | EPHX2   | 5   |  | 5   |  | 5   | By MS/MS   | By MS/MS   | By MS/MS   | By MS/MS   | By MS/MS | By MS/MS |          |          | By MS/MS   |             |          | 14,2  | 62,62  | 0     | 11,22  |
| P07814        | P07814 | Bifunctional glutamate/proline-tRNA ligase;Glutamate-tRNA ligase;Proline-tRNA ligase                        | EPRS    | 62  |  | 62  |  | 62  | By MS/MS   | By MS/MS   | By MS/MS   | By MS/MS   | By MS/MS | By MS/MS | By MS/MS | By MS/MS | By MS/MS   | By MS/MS    | By MS/MS | 51,9  | 170,59 | 0     | 323,31 |
| P42566        | P42566 | Epidermal growth factor receptor substrate 15                                                               | EPS15   | 8   |  | 8   |  | 8   | By MS/MS   | By MS/MS   | By MS/MS   | By MS/MS   | By MS/MS | By MS/MS |          |          |            | By MS/MS    |          | 13,3  | 98,66  | 0     | 77,90  |
| P84090        | P84090 | Enhancer of rudimentary homolog                                                                             | ERH     | 5   |  | 5   |  | 5   | By MS/MS   | By MS/MS   | By MS/MS   | By MS/MS   | By MS/MS | By MS/MS | By MS/MS | By MS/MS | By MS/MS   | By MS/MS    | By MS/MS | 46,2  | 12,26  | 0     | 323,31 |
| O75477        | O75477 | Erlin-1                                                                                                     | ERLIN1  | 5   |  | 3   |  | 3   | By matchir | By matchir | By matchir | By matchir | By MS/MS   | By matching |          | 22,8  | 38,93  | 0     | 4,84   |
| O94905        | O94905 | Erlin-2                                                                                                     | ERLIN2  | 10  |  | 10  |  | 8   | By MS/MS   | By MS/MS   | By MS/MS   | By MS/MS   | By MS/MS | By MS/MS | By MS/MS | By MS/MS | By MS/MS   | By MS/MS    |          | 41,0  | 37,84  | 0     | 35,78  |
| Q96HE7;Q96VB8 | Q96HE7 | ERO1-like protein alpha                                                                                     | EROL1   | 7   |  | 7   |  | 7   | By MS/MS   | By MS/MS   | By MS/MS   | By MS/MS   | By MS/MS | By MS/MS | By MS/MS | By MS/MS |            | By MS/MS    | By MS/MS | 21,6  | 54,39  | 0     | 25,66  |
| P30040        | P30040 | Endoplasmic reticulum resident protein 29                                                                   | ERP29   | 13  |  | 13  |  | 13  | By MS/MS   | By MS/MS   | By MS/MS   | By MS/MS   | By MS/MS | By MS/MS | By MS/MS | By MS/MS | By MS/MS   | By MS/MS    | By MS/MS | 55,9  | 28,99  | 0     | 187,06 |
| Q9BS26        | Q9BS26 | Endoplasmic reticulum resident protein 44                                                                   | ERP44   | 12  |  | 12  |  | 12  | By MS/MS   | By MS/MS   | By MS/MS   | By MS/MS   | By MS/MS | By MS/MS | By MS/MS | By MS/MS | By MS/MS   | By MS/MS    | By MS/MS | 39,9  | 46,97  | 0     | 121,53 |
| P10768        | P10768 | S-formylglutathione hydrolase                                                                               | ESD     | 10  |  | 10  |  | 10  | By MS/MS   | By MS/MS   | By MS/MS   | By MS/MS   | By MS/MS | By MS/MS | By MS/MS | By MS/MS | By MS/MS   | By MS/MS    | By MS/MS | 55,3  | 31,46  | 0     | 308,84 |
| Q9BSJ8        | Q9BSJ8 | Extended synaptotagmin-1                                                                                    | ESYT1   | 35  |  | 35  |  | 35  | By MS/MS   | By MS/MS   | By MS/MS   | By MS/MS   | By MS/MS | By MS/MS | By MS/MS | By MS/MS | By MS/MS   | By MS/MS    | By MS/MS | 43,1  | 122,85 | 0     | 323,31 |
| P62495        | P62495 | Eukaryotic peptide chain release factor subunit 1                                                           | ETF1    | 14  |  | 14  |  | 14  | By MS/MS   | By MS/MS   | By MS/MS   | By MS/MS   | By MS/MS | By MS/MS | By MS/MS | By MS/MS | By MS/MS   |             | By MS/MS | 41,4  | 49,03  | 0     | 88,72  |
| P13804        | P13804 | Electron transfer flavoprotein subunit alpha, mitochondrial                                                 | ETFA    | 14  |  | 14  |  | 14  | By MS/MS   | By MS/MS   | By MS/MS   | By MS/MS   | By MS/MS | By MS/MS | By MS/MS | By MS/MS | By MS/MS   | By MS/MS    | By MS/MS | 65,2  | 35,08  | 0     | 200,18 |
| P38117        | P38117 | Electron transfer flavoprotein subunit beta                                                                 | ETFB    | 18  |  | 18  |  | 18  | By MS/MS   | By MS/MS   | By MS/MS   | By MS/MS   | By MS/MS | By MS/MS | By MS/MS | By MS/MS | By MS/MS   | By MS/MS    | By MS/MS | 58,0  | 27,84  | 0     | 246,94 |
| Q9Y382        | Q9Y382 | Exosome complex component CSL4                                                                              | EXOSC1  | 4   |  | 4   |  | 4   | By MS/MS   | By MS/MS   | By MS/MS   | By MS/MS   | By MS/MS | By MS/MS | By MS/MS | By MS/MS |            | By MS/MS    | By MS/MS | 29,7  | 21,45  | 0     | 323,31 |
| Q13868        | Q13868 | Exosome complex component RRP4                                                                              | EXOSC2  | 4   |  | 4   |  | 4   | By MS/MS   | By MS/MS   | By MS/MS   | By MS/MS   | By MS/MS | By MS/MS | By MS/MS | By MS/MS | By MS/MS   | By MS/MS    | By MS/MS | 19,1  | 32,79  | 0     | 10,00  |
| Q9NPD3        | Q9NPD3 | Exosome complex component RRP41                                                                             | EXOSC4  | 5   |  | 5   |  | 5   | By MS/MS   | By MS/MS   | By MS/MS   | By MS/MS   | By MS/MS |          | By MS/MS | By MS/MS | By MS/MS   | By MS/MS    | By MS/MS | 26,5  | 26,38  | 0     | 69,35  |
| Q9NQ14        | Q9NQ14 | Exosome complex component RRP46                                                                             | EXOSC5  | 4   |  | 4   |  | 4   | By MS/MS   | By MS/MS   |            |            | By MS/MS   |             | By MS/MS | 29,4  | 25,25  | 0     | 9,67   |
| Q5RKV6        | Q5RKV6 | Exosome complex component MTR3                                                                              | EXOSC6  | 4   |  | 4   |  | 4   | By MS/MS   | By MS/MS   |            |            | By MS/MS   |             | By MS/MS | 23,5  | 28,24  | 0     | 4,19   |
| Q15024        | Q15024 | Exosome complex component RRP42                                                                             | EXOSC7  | 6   |  | 6   |  | 6   | By MS/MS   | By MS/MS   | By MS/MS   |            | By MS/MS   | By MS/MS    |          | 38,5  | 31,82  | 0     | 40,45  |
| Q96826        | Q96826 | Exosome complex component RRP43                                                                             | EXOSC8  | 5   |  | 5   |  | 5   | By MS/MS   |            | By MS/MS   |            | By MS/MS   | By MS/MS    | By MS/MS | 31,2  | 30,04  | 0     | 30,42  |
| Q99504        | Q99504 | Eyes absent homolog 3                                                                                       | EYAZ    | 4   |  | 4   |  | 4   | By MS/MS   | By MS/MS   | By MS/MS   | By MS/MS   | By MS/MS | By MS/MS |          |          | By MS/MS   |             | 10,5     | 62,66 | 0      | 14,21 |        |
| P15311        | P15311 | Ezrin                                                                                                       | EZR     | 25  |  | 17  |  | 16  | By MS/MS   | By MS/MS   | By MS/MS   | By MS/MS   | By MS/MS | By MS/MS | By MS/MS | By MS/MS | By MS/MS   | By MS/MS    | By MS/MS | 48,5  | 69,41  | 0     | 323,31 |
| Q01469;A8MUU1 | Q01469 | Fatty acid-binding protein, epidermal                                                                       | FABP5   | 13  |  | 13  |  | 13  | By MS/MS   | By MS/MS   | By MS/MS   | By MS/MS   | By MS/MS | By MS/MS | By MS/MS | By MS/MS | By MS/MS   | By MS/MS    | By MS/MS | 85,2  | 15,16  | 0     | 199,59 |
| Q96CS3        | Q96CS3 | FAS-associated factor 2                                                                                     | FAF2    | 13  |  | 13  |  | 13  | By MS/MS   | By MS/MS   | By MS/MS   | By MS/MS   | By MS/MS | By MS/MS | By MS/MS | By MS/MS | By MS/MS   | By MS/MS    | By MS/MS | 44,3  | 52,62  | 0     | 53,70  |
| P16930        | P16930 | Fumarylacetoacetase                                                                                         | FAH     | 12  |  | 12  |  | 12  | By MS/MS   | By MS/MS   | By MS/MS   | By MS/MS   | By MS/MS | By MS/MS | By MS/MS | By MS/MS | By MS/MS   | By MS/MS    |          | 39,9  | 46,37  | 0     | 67,29  |
| Q96TA1        | Q96TA1 | Niban-like protein 1                                                                                        | FAM129B | 6   |  | 6   |  | 6   | By MS/MS   | By MS/MS   | By MS/MS   | By MS/MS   | By MS/MS | By MS/MS |          |          | By MS/MS   | By MS/MS    | By MS/MS | 14,1  | 84,14  | 0     | 23,70  |
| Q96C01        | Q96C01 | Protein FAM136A                                                                                             | FAM136A | 5   |  | 5   |  | 5   | By MS/MS   | By MS/MS   | By MS/MS   | By MS/MS   | By MS/MS | By MS/MS |          |          | By MS/MS   | By MS/MS    | By MS/MS | 44,9  | 15,64  | 0     | 10,79  |
| Q96A26        | Q96A26 | Protein FAM162A                                                                                             | FAM162A | 6   |  | 6   |  | 6   | By MS/MS   | By MS/MS   | By MS/MS   | By MS/MS   | By MS/MS | By MS/MS |          |          | By MS/MS   | By MS/MS    | By MS/MS | 37,0  | 17,34  | 0     | 10,58  |
| Q9NSI2        | Q9NSI2 | Protein FAM207A                                                                                             | FAM207A | 4   |  | 4   |  | 4   |            | By MS/MS   |            |            |          |          | By MS/MS | By MS/MS | By MS/MS   | By MS/MS    | By MS/MS | 27,0  | 25,46  | 0     | 5,21   |
| Q9NUQ9;Q9HOQ0 | Q9NUQ9 | Protein FAM49B                                                                                              | FAM49B  | 15  |  | 15  |  | 15  | By MS/MS   | By MS/MS   | By MS/MS   | By MS/MS   | By MS/MS | By MS/MS | By MS/MS | By MS/MS | By MS/MS   | By MS/MS    | By MS/MS | 65,1  | 36,75  | 0     | 297,47 |
| Q8NCAS        | Q8NCAS | Protein FAM98A                                                                                              | FAM98A  | 4   |  | 4   |  | 4   |            | By MS/MS   |            |            |          |          | By MS/MS | By MS/MS | By MS/MS   | By MS/MS    | By MS/MS | 13,1  | 55,40  | 0     | 12,14  |
| Q9NV11        | Q9NV11 | Fanconi anemia group I protein                                                                              | FANCI   | 7   |  | 7   |  | 7   | By MS/MS   | By MS/MS   | By MS/MS   | By MS/MS   |          |          | By MS/MS |          |            |             |          | 7,4   | 149,32 | 0     | 13,49  |
| Q9Y285        | Q9Y285 | Phenylalanine-tRNA ligase alpha subunit                                                                     | FARSA   | 17  |  | 17  |  | 17  | By MS/MS   | By MS/MS   | By MS/MS   | By MS/MS   | By MS/MS | By MS/MS | By MS/MS | By MS/MS |            | By MS/MS    | By MS/MS | 45,7  | 57,56  | 0     | 172,70 |
| Q9NSD9        | Q9NSD9 | Phenylalanine-tRNA ligase beta subunit                                                                      | FARSB   | 15  |  | 15  |  | 15  | By MS/MS   | By MS/MS   | By MS/MS   | By MS/MS   | By MS/MS | By MS/MS | By MS/MS | By MS/MS | By MS/MS   | By MS/MS    | By MS/MS | 29,2  | 66,12  | 0     | 63,34  |
| P49327        | P49327 | Fatty acid synthase                                                                                         | FASN    | 121 |  | 121 |  | 121 | By MS/MS   | By MS/MS   | By MS/MS   | By MS/MS   | By MS/MS | By MS/MS | By MS/MS | By MS/MS | By MS/MS   | By MS/MS    | By MS/MS | 65,1  | 273,42 | 0     | 323,31 |
| P22087        | P22087 | rRNA 2-O-methyltransferase fibrillar                                                                        | FB1     | 10  |  | 10  |  | 9   | By MS/MS   | By MS/MS   | By MS/MS   | By MS/MS   | By MS/MS | By MS/MS | By MS/MS | By MS/MS | By MS/MS   | By MS/MS    | By MS/MS | 43,3  | 33,78  | 0     | 81,00  |
| P14324        | P14324 | Farnesyl pyrophosphate synthase                                                                             | FDPS    | 9   |  | 9   |  | 9   | By MS/MS   | By MS/MS   | By MS/MS   | By MS/MS   | By MS/MS | By MS/MS | By MS/MS | By MS/MS | By MS/MS   | By MS/MS    | By MS/MS | 31,3  | 48,28  | 0     | 17,21  |
| P22570        | P22570 | NADPH:adenodoxin oxidoreductase, mitochondrial                                                              | FDXR    | 6   |  | 6   |  | 6   | By MS/MS   | By MS/MS   |            |            | By MS/MS | By MS/MS | By MS/MS | By MS/MS |            | By MS/MS    | By MS/MS | 14,9  | 53,84  | 0     | 8,31   |
| P22830        | P22830 | Ferrochelatase, mitochondrial                                                                               | FECH    | 11  |  | 11  |  | 11  | By MS/MS   | By MS/MS   | By MS/MS   | By MS/MS   | By MS/MS | By MS/MS | By MS/MS | By MS/MS | By MS/MS   | By MS/MS    | By MS/MS | 46,8  | 47,86  | 0     | 24,83  |
| P39748        | P39748 | Flap endonuclease 1                                                                                         | FEN1    | 11  |  | 11  |  | 11  | By MS/MS   | By MS/MS   | By MS/MS   | By MS/MS   | By MS/MS | By MS/MS | By MS/MS | By MS/MS | By MS/MS   | By MS/MS    | By MS/MS | 41,1  | 42,59  | 0     | 224,90 |
| Q86UX7        | Q86UX7 | Fermitin family homolog 3                                                                                   | FERMT3  | 19  |  | 19  |  | 19  | By MS/MS   | By MS/MS   | By MS/MS   | By MS/MS   | By MS/MS | By MS/MS | By MS/MS | By MS/MS | By MS/MS   | By MS/MS    | By MS/MS | 45,1  | 75,95  | 0     | 212,58 |
| P07954        | P07954 | Fumarate hydratase, mitochondrial                                                                           | FH      | 20  |  | 20  |  | 20  | By MS/MS   | By MS/MS   | By MS/MS   | By MS/MS   | By MS/MS | By MS/MS | By MS/MS | By MS/MS | By MS/MS   | By MS/MS    | By MS/MS | 55,9  | 54,64  | 0     | 323,31 |
| Q9V613        | Q9V613 | FH1/FH2 domain-containing protein 1                                                                         | FHOD1   | 8   |  | 8   |  | 8   | By MS/MS   | By MS/MS   | By MS/MS   | By MS/MS   | By MS/MS | By MS/MS |          |          | By MS/MS   |             |          | 12,8  | 126,55 | 0     | 46,89  |
| Q9Y3D6        | Q9Y3D6 | Mitochondrial fission 1 protein                                                                             | FIS1    | 5   |  | 5   |  | 5   | By MS/MS   | By MS/MS   |            |            | By MS/MS   | By MS/MS    | By MS/MS | 34,9  | 16,94  | 0     | 80,89  |
| P62942        | P62942 | Peptidyl-prolyl cis-trans isomerase FKBP1A                                                                  | FKBP1A  | 6   |  | 6   |  | 6   | By MS/MS   | By MS/MS   | By MS/MS   | By MS/MS   | By MS/MS | By MS/MS | By MS/MS | By MS/MS | By MS/MS   | By MS/MS    | By MS/MS | 50,0  | 11,95  | 0     | 108,12 |
| P26885        | P26885 | Peptidyl-prolyl cis-trans isomerase FKBP2                                                                   | FKBP2   | 4   |  | 4   |  | 4   | By MS/MS   | By MS/MS   | By MS/MS   | By MS/MS   |          |          | By MS/MS | By MS/MS |            |             | By MS/MS | 39,4  | 15,65  | 0     | 20,59  |
| Q00688        | Q00688 | Peptidyl-prolyl cis-trans isomerase FKBP3                                                                   | FKBP3   | 6   |  | 6   |  | 6   | By MS/MS   | By MS/MS   | By MS/MS   | By MS/MS   | By MS/MS | By MS/MS | By MS/MS | By MS/MS | By MS/MS   | By MS/MS    | By MS/MS | 31,2  | 25,18  | 0     | 12,36  |
| Q02790        | Q02790 | Peptidyl-prolyl cis-trans isomerase FKBP4;Peptidyl-prolyl cis-trans isomerase FKBP4, N-terminally processed | FKBP4   | 29  |  | 29  |  | 29  | By MS/MS   | By MS/MS   | By MS/MS   | By MS/MS   | By MS/MS | By MS/MS | By MS/MS | By MS/MS |            | By MS/MS    | By MS/MS | 73,9  | 51,80  | 0     | 323,31 |
| Q13451        | Q13451 | Peptidyl-prolyl cis-trans isomerase FKBP5;Peptidyl-prolyl cis-trans isomerase FKBP5, N-terminally processed | FKBP5   | 18  |  | 18  |  | 18  | By MS/MS   | By MS/MS   | By MS/MS   | By MS/MS   | By MS/MS | By MS/MS | By MS/MS | By MS/MS | By MS/MS   | By MS/MS    | By MS/MS | 54,9  | 51,21  | 0     | 323,31 |
| Q14318        | Q14318 | Peptidyl-prolyl cis-trans isomerase FKBP8                                                                   | FKBP8   | 8   |  | 8   |  | 8   | By MS/MS   | By MS/MS   | By MS/MS   | By MS/MS   | By MS/MS | By MS/MS |          |          | By MS/MS   | By MS/MS    | By MS/MS | 31,6  | 44,56  | 0     | 49,00  |
| P21333        | P21333 | Filamin-A                                                                                                   | FLNA    | 101 |  | 101 |  | 94  | By MS/MS   | By MS/MS   | By MS/MS   |            |          |          |          |          |            |             |          |       |        |       |        |



|                                                  |               |                                                                                                                                                                                   |             |    |    |    |            |          |            |          |          |          |          |             |             |          |          |            |          |          |      |        |   |        |
|--------------------------------------------------|---------------|-----------------------------------------------------------------------------------------------------------------------------------------------------------------------------------|-------------|----|----|----|------------|----------|------------|----------|----------|----------|----------|-------------|-------------|----------|----------|------------|----------|----------|------|--------|---|--------|
| P35637                                           | P35637        | RNA-binding protein FUS                                                                                                                                                           | FUS         | 7  | 7  | 5  | By MS/MS   | By MS/MS | By MS/MS   | By MS/MS | By MS/MS | By MS/MS | By MS/MS | By MS/MS    | By MS/MS    | By MS/MS | By MS/MS | By MS/MS   | By MS/MS | By MS/MS | 15,8 | 53,43  | 0 | 48,12  |
| Q13283                                           | Q13283        | Ras GTPase-activating protein-binding protein 1                                                                                                                                   | G3BP1       | 11 | 11 | 10 | By MS/MS   | By MS/MS | By MS/MS   | By MS/MS | By MS/MS | By MS/MS | By MS/MS | By MS/MS    | By MS/MS    | By MS/MS | By MS/MS | By MS/MS   | By MS/MS | By MS/MS | 38,4 | 52,16  | 0 | 111,20 |
| Q9UN86                                           | Q9UN86        | Ras GTPase-activating protein-binding protein 2                                                                                                                                   | G3BP2       | 7  | 6  | 6  | By MS/MS   | By MS/MS | By MS/MS   | By MS/MS | By MS/MS | By MS/MS | By MS/MS | By MS/MS    | By MS/MS    | By MS/MS | By MS/MS | By MS/MS   | By MS/MS | By MS/MS | 22,4 | 54,12  | 0 | 41,55  |
| P11413                                           | P11413        | Glucose-6-phosphate 1-dehydrogenase                                                                                                                                               | G6PD        | 30 | 30 | 30 | By MS/MS   | By MS/MS | By MS/MS   | By MS/MS | By MS/MS | By MS/MS | By MS/MS | By MS/MS    | By MS/MS    | By MS/MS | By MS/MS | By MS/MS   | By MS/MS | By MS/MS | 75,3 | 59,26  | 0 | 323,31 |
| P60520;Q9HOR8;O95166                             | P60520        | Gamma-aminobutyric acid receptor-associated protein-like 2                                                                                                                        | GABARAPL2   | 7  | 7  | 7  | By MS/MS   | By MS/MS | By MS/MS   | By MS/MS | By MS/MS | By MS/MS | By MS/MS | By MS/MS    | By MS/MS    | By MS/MS | By MS/MS | By MS/MS   | By MS/MS | By MS/MS | 41,9 | 13,67  | 0 | 19,28  |
| Q8TAE8                                           | Q8TAE8        | Growth arrest and DNA damage-inducible proteins-interacting protein 1                                                                                                             | GADD45GIP1  | 6  | 6  | 6  | By MS/MS   | By MS/MS | By MS/MS   | By MS/MS | By MS/MS | By MS/MS | By MS/MS | By MS/MS    | By MS/MS    | By MS/MS | By MS/MS | By MS/MS   | By MS/MS | By MS/MS | 35,1 | 25,38  | 0 | 92,57  |
| Q14376                                           | Q14376        | UDP-glucose 4-epimerase                                                                                                                                                           | GALE        | 5  | 5  | 5  |            | By MS/MS |            | By MS/MS    | By MS/MS    | By MS/MS | By MS/MS | By MS/MS   | By MS/MS | By MS/MS | 24,4 | 38,28  | 0 | 101,99 |
| P51570                                           | P51570        | Galactokinase                                                                                                                                                                     | GALK1       | 5  | 5  | 5  |            | By MS/MS |            |          | By MS/MS | By MS/MS | By MS/MS | By MS/MS    | By MS/MS    | By MS/MS | By MS/MS | By MS/MS   | By MS/MS | By MS/MS | 16,8 | 42,27  | 0 | 4,42   |
| Q14697                                           | Q14697        | Neutral alpha-glucosidase AB                                                                                                                                                      | GANAB       | 43 | 43 | 43 | By MS/MS   | By MS/MS | By MS/MS   | By MS/MS | By MS/MS | By MS/MS | By MS/MS | By MS/MS    | By MS/MS    | By MS/MS | By MS/MS | By MS/MS   | By MS/MS | By MS/MS | 56,8 | 106,87 | 0 | 323,31 |
| P04406;Q14556                                    | P04406        | Glyceraldehyde-3-phosphate dehydrogenase                                                                                                                                          | GAPDH       | 22 | 22 | 22 | By MS/MS   | By MS/MS | By MS/MS   | By MS/MS | By MS/MS | By MS/MS | By MS/MS | By MS/MS    | By MS/MS    | By MS/MS | By MS/MS | By MS/MS   | By MS/MS | By MS/MS | 77,6 | 36,05  | 0 | 323,31 |
| P41250                                           | P41250        | Glycine-tRNA ligase                                                                                                                                                               | GARS        | 27 | 27 | 27 | By MS/MS   | By MS/MS | By MS/MS   | By MS/MS | By MS/MS | By MS/MS | By MS/MS | By MS/MS    | By MS/MS    | By MS/MS | By MS/MS | By MS/MS   | By MS/MS | By MS/MS | 50,6 | 83,17  | 0 | 323,31 |
| P22102                                           | P22102        | Trifunctional purine biosynthetic protein adenosine-3-Phosphoribosylamine-glycine ligase;Phosphoribosylformylglycinamide cyclo-ligase;Phosphoribosylglycinamide formyltransferase | GART        | 35 | 35 | 35 | By MS/MS   | By MS/MS | By MS/MS   | By MS/MS | By MS/MS | By MS/MS | By MS/MS | By MS/MS    | By MS/MS    | By MS/MS | By MS/MS | By MS/MS   | By MS/MS | By MS/MS | 50,2 | 107,77 | 0 | 323,31 |
| O75323                                           | O75323        | Protein NipSnap homolog 2                                                                                                                                                         | GBAS        | 5  | 5  | 5  | By MS/MS   | By MS/MS | By MS/MS   | By MS/MS | By MS/MS | By MS/MS | By MS/MS | By MS/MS    | By MS/MS    | By MS/MS |          |            | By MS/MS |          | 22,7 | 33,74  | 0 | 9,77   |
| P48507                                           | P48507        | Glutamate-cysteine ligase regulatory subunit                                                                                                                                      | GCLM        | 4  | 4  | 4  | By MS/MS   | By MS/MS | By MS/MS   | By MS/MS | By MS/MS | By MS/MS | By MS/MS | By MS/MS    | By MS/MS    | By MS/MS | By MS/MS | By MS/MS   | By MS/MS | By MS/MS | 21,2 | 30,73  | 0 | 181,46 |
| Q92616                                           | Q92616        | Translational activator GCN1                                                                                                                                                      | GCN1L1      | 88 | 88 | 88 | By MS/MS   | By MS/MS | By MS/MS   | By MS/MS | By MS/MS | By MS/MS | By MS/MS | By MS/MS    | By MS/MS    | By MS/MS | By MS/MS | By MS/MS   | By MS/MS | By MS/MS | 45,6 | 292,75 | 0 | 323,31 |
| P31150                                           | P31150        | Rab GDP dissociation inhibitor alpha                                                                                                                                              | GDI1        | 16 | 6  | 6  | By MS/MS   | By MS/MS | By matchir | By MS/MS | By MS/MS | By MS/MS | By MS/MS | By matchir  | By matching |          |          | By MS/MS   | By MS/MS |          | 43,2 | 50,58  | 0 | 81,12  |
| P50395                                           | P50395        | Rab GDP dissociation inhibitor beta                                                                                                                                               | GDI2        | 43 | 43 | 33 | By MS/MS   | By MS/MS | By MS/MS   | By MS/MS | By MS/MS | By MS/MS | By MS/MS | By MS/MS    | By MS/MS    | By MS/MS |          |            | By MS/MS |          | 89,4 | 50,66  | 0 | 323,31 |
| P57678                                           | P57678        | Gem-associated protein 4                                                                                                                                                          | GEMIN4      | 4  | 4  | 4  | By MS/MS   | By MS/MS | By MS/MS   |          | By MS/MS |          | By MS/MS |             |             |          |          |            |          |          | 5,9  | 120,04 | 0 | 7,02   |
| Q8TE06                                           | Q8TE06        | Gem-associated protein 5                                                                                                                                                          | GEMIN5      | 11 | 11 | 11 | By MS/MS   | By MS/MS | By MS/MS   | By MS/MS | By MS/MS | By MS/MS | By MS/MS |             |             | By MS/MS | By MS/MS | By MS/MS   | By MS/MS | By MS/MS | 9,8  | 168,59 | 0 | 90,61  |
| Q7L5D6                                           | Q7L5D6        | Golgi to ER traffic protein 4 homolog                                                                                                                                             | GET4        | 5  | 5  | 5  | By MS/MS   | By MS/MS | By MS/MS   | By MS/MS | By MS/MS | By MS/MS | By MS/MS | By MS/MS    | By MS/MS    | By MS/MS | By MS/MS | By MS/MS   | By MS/MS | By MS/MS | 20,8 | 36,50  | 0 | 24,90  |
| Q96RP9                                           | Q96RP9        | Elongation factor G, mitochondrial                                                                                                                                                | GFM1        | 8  | 8  | 8  | By MS/MS   | By MS/MS | By MS/MS   | By MS/MS | By MS/MS | By MS/MS | By MS/MS | By MS/MS    | By MS/MS    | By MS/MS | By MS/MS | By MS/MS   | By MS/MS | By MS/MS | 12,6 | 83,47  | 0 | 22,09  |
| Q06210;Q94808                                    | Q06210        | Glutamine-fructose-6-phosphate aminotransferase [isomerizing] 1                                                                                                                   | GFPT1       | 20 | 20 | 20 | By MS/MS   | By MS/MS | By MS/MS   | By MS/MS | By MS/MS | By MS/MS | By MS/MS | By MS/MS    | By MS/MS    | By MS/MS | By MS/MS | By MS/MS   | By MS/MS | By MS/MS | 39,3 | 78,81  | 0 | 220,77 |
| O75223                                           | O75223        | Gamma-glutamylcyclotransferase                                                                                                                                                    | GGCT        | 8  | 8  | 8  | By MS/MS   | By MS/MS | By MS/MS   | By MS/MS | By MS/MS | By MS/MS | By MS/MS | By MS/MS    | By MS/MS    | By MS/MS | By MS/MS | By MS/MS   | By MS/MS | By MS/MS | 46,8 | 21,01  | 0 | 244,37 |
| Q95749                                           | Q95749        | Geranylgeranyl pyrophosphate synthase                                                                                                                                             | GGPS1       | 6  | 6  | 6  | By MS/MS   | By MS/MS | By MS/MS   | By MS/MS | By MS/MS | By MS/MS | By MS/MS | By MS/MS    | By MS/MS    | By MS/MS |          | By MS/MS   |          |          | 28,7 | 34,87  | 0 | 7,78   |
| Q14691                                           | Q14691        | DNA replication complex GINS protein PSF1                                                                                                                                         | GINS1       | 5  | 5  | 5  | By MS/MS   | By MS/MS | By MS/MS   | By MS/MS | By MS/MS | By MS/MS | By MS/MS |             | By MS/MS    |          |          |            | By MS/MS | By MS/MS | 29,1 | 22,99  | 0 | 18,99  |
| Q9BRX5                                           | Q9BRX5        | DNA replication complex GINS protein PSF3                                                                                                                                         | GINS3       | 5  | 5  | 5  | By MS/MS   | By MS/MS | By MS/MS   | By MS/MS | By MS/MS | By MS/MS | By MS/MS | By MS/MS    |             | By MS/MS |          |            |          |          | 25,0 | 24,53  | 0 | 5,02   |
| P16278                                           | P16278        | Beta-galactosidase                                                                                                                                                                | GLB1        | 4  | 4  | 4  | By MS/MS   | By MS/MS | By MS/MS   | By MS/MS | By MS/MS | By MS/MS | By MS/MS | By MS/MS    |             |          |          |            | By MS/MS | By MS/MS | 8,1  | 76,07  | 0 | 19,28  |
| Q04760                                           | Q04760        | Lactoylglutathione lyase                                                                                                                                                          | GLO1        | 18 | 18 | 18 | By MS/MS   | By MS/MS | By MS/MS   | By MS/MS | By MS/MS | By MS/MS | By MS/MS | By MS/MS    | By MS/MS    | By MS/MS | By MS/MS | By MS/MS   | By MS/MS | By MS/MS | 87,5 | 20,78  | 0 | 179,15 |
| Q9HC38                                           | Q9HC38        | Glyoxalase domain-containing protein 4                                                                                                                                            | GLOD4       | 10 | 10 | 10 | By MS/MS   | By MS/MS | By MS/MS   | By MS/MS | By MS/MS | By MS/MS | By MS/MS | By MS/MS    | By MS/MS    | By MS/MS | By MS/MS | By MS/MS   | By MS/MS | By MS/MS | 45,0 | 34,79  | 0 | 157,49 |
| O76003                                           | O76003        | Glutaredoxin-3                                                                                                                                                                    | GLRX3       | 16 | 16 | 16 | By MS/MS   | By MS/MS | By MS/MS   | By MS/MS | By MS/MS | By MS/MS | By MS/MS | By MS/MS    | By MS/MS    | By MS/MS | By MS/MS | By MS/MS   | By MS/MS | By MS/MS | 57,3 | 37,43  | 0 | 152,07 |
| O94925                                           | O94925        | Glutaminase kidney isoform, mitochondrial                                                                                                                                         | GLS         | 4  | 4  | 4  | By MS/MS   | By MS/MS | By MS/MS   | By MS/MS | By MS/MS | By MS/MS | By MS/MS | By MS/MS    | By MS/MS    | By MS/MS | By MS/MS | By MS/MS   | By MS/MS | By MS/MS | 9,3  | 73,46  | 0 | 10,38  |
| P00367;P49448                                    | P00367;P49448 | Glutamate dehydrogenase 1, mitochondrial;Glutamate dehydrogenase 2, mitochondrial                                                                                                 | GLUD1;GLUD2 | 20 | 20 | 20 | By MS/MS   | By MS/MS | By MS/MS   | By MS/MS | By MS/MS | By MS/MS | By MS/MS | By MS/MS    | By MS/MS    |          |          | By MS/MS   | By MS/MS |          | 47,7 | 61,40  | 0 | 121,72 |
| P49915                                           | P49915        | GMP synthase [glutamine-hydrolyzing]                                                                                                                                              | GMPS        | 27 | 27 | 27 | By MS/MS   | By MS/MS | By MS/MS   | By MS/MS | By MS/MS | By MS/MS | By MS/MS | By MS/MS    | By MS/MS    | By MS/MS | By MS/MS | By MS/MS   | By MS/MS | By MS/MS | 53,8 | 76,72  | 0 | 323,31 |
| P04899                                           | P04899        | Guanine nucleotide-binding protein G(i) subunit alpha-2                                                                                                                           | GNAI2       | 4  | 2  | 2  | By matchir | By MS/MS | By MS/MS   | By MS/MS | By MS/MS | By MS/MS | By MS/MS | By MS/MS    | By MS/MS    | By MS/MS | By MS/MS | By MS/MS   | By MS/MS | By MS/MS | 14,4 | 40,45  | 0 | 8,30   |
| P08754;P63096;P09471;P11488;P19087;ABMTJ3;P38405 | P08754        | Guanine nucleotide-binding protein G(i) subunit alpha                                                                                                                             | GNAI3       | 8  | 8  | 6  | By MS/MS   | By MS/MS | By MS/MS   | By MS/MS | By MS/MS | By MS/MS | By MS/MS | By MS/MS    | By MS/MS    | By MS/MS | By MS/MS |            |          |          | 27,4 | 40,53  | 0 | 72,60  |
| P63092;Q51WF2                                    | P63092;Q51WF2 | Guanine nucleotide-binding protein G(s) subunit alpha isoforms short;Guanine nucleotide-binding protein G(s) subunit alpha isoforms XLas                                          | GNA5        | 4  | 3  | 3  | By MS/MS   | By MS/MS | By MS/MS   | By MS/MS | By MS/MS | By MS/MS | By MS/MS | By MS/MS    | By MS/MS    | By MS/MS | By MS/MS |            |          |          | 15,5 | 45,66  | 0 | 9,42   |
| P62873                                           | P62873        | Guanine nucleotide-binding protein G(i)(G(s))/G(T) subunit beta-1                                                                                                                 | GNB1        | 12 | 12 | 7  | By MS/MS   | By MS/MS | By MS/MS   | By MS/MS | By MS/MS | By MS/MS | By MS/MS | By MS/MS    |             | By MS/MS | By MS/MS | By MS/MS   | By MS/MS | By MS/MS | 46,2 | 37,38  | 0 | 53,19  |
| P62879;Q9HAV0;P16520                             | P62879        | Guanine nucleotide-binding protein G(i)(G(s))/G(T) subunit beta-2                                                                                                                 | GNB2        | 10 | 5  | 5  | By MS/MS   | By MS/MS | By MS/MS   | By MS/MS | By MS/MS | By MS/MS | By MS/MS | By matching |             | By MS/MS | By MS/MS | By matchir | By MS/MS |          | 39,7 | 37,33  | 0 | 62,48  |
| P63244                                           | P63244        | Guanine nucleotide-binding protein subunit beta-2-like 1;Guanine nucleotide-binding protein subunit beta-2-like 1, N-terminally processed                                         | GNB2L1      | 20 | 20 | 20 | By MS/MS   | By MS/MS | By MS/MS   | By MS/MS | By MS/MS | By MS/MS | By MS/MS | By MS/MS    | By MS/MS    | By MS/MS | By MS/MS | By MS/MS   | By MS/MS | By MS/MS | 81,4 | 35,08  | 0 | 323,31 |
| P46926;Q8TDQ7                                    | P46926        | Glucosamine-6-phosphate isomerase 1                                                                                                                                               | GNPDA1      | 12 | 12 | 12 | By MS/MS   | By MS/MS | By MS/MS   | By MS/MS | By MS/MS | By MS/MS | By MS/MS | By MS/MS    | By MS/MS    | By MS/MS | By MS/MS | By MS/MS   | By MS/MS | By MS/MS | 54,3 | 32,67  | 0 | 90,30  |
| Q96EK6                                           | Q96EK6        | Glucosamine 6-phosphate N-acetyltransferase                                                                                                                                       | GNPNAT1     | 6  | 6  | 6  | By MS/MS   | By MS/MS | By MS/MS   | By MS/MS | By MS/MS | By MS/MS | By MS/MS | By MS/MS    | By MS/MS    | By MS/MS | By MS/MS | By MS/MS   | By MS/MS | By MS/MS | 37,5 | 20,75  | 0 | 50,86  |
| Q7Z5G4                                           | Q7Z5G4        | Golgin subfamily A member 7                                                                                                                                                       | GOLGA7      | 4  | 4  | 4  | By MS/MS   | By MS/MS | By MS/MS   | By MS/MS | By MS/MS | By MS/MS | By MS/MS |             |             |          | By MS/MS |            |          |          | 32,8 | 15,82  | 0 | 10,05  |
| Q9H4A6                                           | Q9H4A6        | Golgi phosphoprotein 3                                                                                                                                                            | GOLPH3      | 4  | 4  | 3  | By MS/MS   | By MS/MS | By MS/MS   | By MS/MS | By MS/MS | By MS/MS |          |             |             |          |          | By MS/MS   |          |          | 15,4 | 33,81  | 0 | 63,55  |
| Q9H8Y8                                           | Q9H8Y8        | Golgi reassembly-stacking protein 2                                                                                                                                               | GORASP2     | 7  | 7  | 7  | By MS/MS   | By MS/MS | By MS/MS   | By MS/MS | By MS/MS | By MS/MS | By MS/MS |             |             | By MS/MS | By MS/MS |            |          |          | 27,2 | 47,15  | 0 | 77,30  |
| P17174                                           | P17174        | Aspartate aminotransferase, cytoplasmic                                                                                                                                           | GOT1        | 21 | 21 | 21 | By MS/MS   | By MS/MS | By MS/MS   | By MS/MS | By MS/MS | By MS/MS | By MS/MS | By MS/MS    | By MS/MS    | By MS/MS | By MS/MS |            |          |          | 64,2 | 46,25  | 0 | 139,03 |
| P00505                                           | P00505        | Aspartate aminotransferase, mitochondrial                                                                                                                                         | GOT2        | 24 | 24 | 24 | By MS/MS   | By MS/MS | By MS/MS   | By MS/MS | By MS/MS | By MS/MS | By MS/MS | By MS/MS    | By MS/MS    | By MS/MS | By MS/MS | By MS/MS   | By MS/MS | By MS/MS | 66,5 | 47,52  | 0 | 323,31 |
| P43304                                           | P43304        | Glycerol-3-phosphate dehydrogenase, mitochondrial                                                                                                                                 | GPD2        | 9  | 9  | 9  | By MS/MS   | By MS/MS | By MS/MS   | By MS/MS | By MS/MS | By MS/MS | By MS/MS | By MS/MS    | By MS/MS    |          | By MS/MS | By MS/MS   |          |          | 20,4 | 80,85  | 0 | 17,50  |
| P06744;Q8N196                                    | P06744        | Glucose-6-phosphate isomerase                                                                                                                                                     | GPI         | 26 | 26 | 20 | By MS/MS   | By MS/MS | By MS/MS   | By MS/MS | By MS/MS | By MS/MS | By MS/MS | By MS/MS    | By MS/MS    |          |          | By MS/MS   | By MS/MS |          | 62,5 | 63,15  | 0 | 323,31 |
| Q13098                                           | Q13098        | COP9 signalosome complex subunit 1                                                                                                                                                | GP51        | 4  | 4  | 4  |            | By MS/MS |            | By MS/MS    | By MS/MS    |          |          |            |          |          | 14,1 | 55,54  | 0 | 4,77   |
| P36969                                           | P36969        | Phospholipid hydroperoxide glutathione peroxidase, mitochondrial                                                                                                                  | GPX4        | 5  | 5  | 5  | By MS/MS   | By MS/MS | By MS/MS   | By MS/MS | By MS/MS | By MS/MS | By MS/MS | By MS/MS    | By MS/MS    | By MS/MS | By MS/MS |            |          |          | 35,0 | 22,17  | 0 | 16,44  |
| O75791                                           | O75791        | GRB2-related adapter protein 2                                                                                                                                                    | GRAP2       | 5  | 5  | 5  | By MS/MS   | By MS/MS |            | By MS/MS | By MS/MS | By MS/MS | By MS/MS |             | By MS/MS    | By MS/MS |          |            | By MS/MS | By MS/MS | 17,3 | 37,91  | 0 | 6,04   |
| P62993                                           | P62993        | Growth factor receptor-bound protein 2                                                                                                                                            | GRB2        | 8  | 8  | 8  | By MS/MS   | By MS/MS | By MS/MS   | By MS/MS | By MS/MS | By MS/MS | By MS/MS | By MS/MS    | By MS/MS    | By MS/MS | By MS/MS | By MS/MS   | By MS/MS | By MS/MS | 43,3 | 25,21  | 0 | 32,34  |
| Q9UBQ7                                           | Q9UBQ7        | Glyoxylate reductase/hydroxypyruvate reductase                                                                                                                                    | GRHPR       | 12 | 12 | 12 | By MS/MS   | By MS/MS | By MS/MS   | By MS/MS | By MS/MS | By MS/MS | By MS/MS | By MS/MS    | By MS/MS    | By MS/MS | By MS/MS | By MS/MS   | By MS/MS | By MS/MS | 52,4 | 35,67  | 0 | 323,31 |
| Q9HAv7                                           | Q9HAv7        | Grp94 protein homolog 1, mitochondrial                                                                                                                                            | GRPEL1      | 10 | 10 | 10 | By MS/MS   | By MS/MS | By MS/MS   | By MS/MS | By MS/MS | By MS/MS | By MS/MS | By MS/MS    | By MS/MS    | By MS/MS | By MS/MS | By MS/MS   | By MS/MS | By MS/MS | 52,1 | 24,28  | 0 | 50,66  |
| Q9BQ67                                           | Q9BQ67        | Glutamate-rich WD repeat-containing protein 1                                                                                                                                     | GRWD1       | 5  | 5  | 5  | By MS/MS   | By MS/MS | By MS/MS   | By MS/MS | By MS/MS | By MS/MS | By MS/MS | By MS/MS    | By MS/MS    | By MS/MS | By MS/MS | By MS/MS   | By MS/MS | By MS/MS | 23,3 | 49,42  | 0 | 38,61  |
| P15170                                           | P             |                                                                                                                                                                                   |             |    |    |    |            |          |            |          |          |          |          |             |             |          |          |            |          |          |      |        |   |        |

|                                                                       |                                                                |                                                                                                                                                                                                                                                                                                        |                                                                                       |    |    |    |            |            |            |            |            |            |          |            |            |             |            |          |            |            |        |        |       |        |
|-----------------------------------------------------------------------|----------------------------------------------------------------|--------------------------------------------------------------------------------------------------------------------------------------------------------------------------------------------------------------------------------------------------------------------------------------------------------|---------------------------------------------------------------------------------------|----|----|----|------------|------------|------------|------------|------------|------------|----------|------------|------------|-------------|------------|----------|------------|------------|--------|--------|-------|--------|
| P09211                                                                | P09211                                                         | Glutathione S-transferase P                                                                                                                                                                                                                                                                            | GSTP1                                                                                 | 17 | 17 | 17 | By MS/MS   | By MS/MS | By MS/MS   | By MS/MS   | By MS/MS    | By MS/MS   | By MS/MS | By MS/MS   | By MS/MS   | 71,9   | 23,36  | 0     | 323,31 |
| P35269                                                                | P35269                                                         | General transcription factor IIF subunit 1                                                                                                                                                                                                                                                             | GTF2F1                                                                                | 4  | 4  | 4  | By MS/MS   | By MS/MS | By MS/MS   | By MS/MS   | By MS/MS    | By MS/MS   | By MS/MS | By MS/MS   | By MS/MS   | 9,7    | 58,24  | 0     | 17,66  |
| P78347                                                                | P78347                                                         | General transcription factor II-I                                                                                                                                                                                                                                                                      | GTF2I                                                                                 | 12 | 12 | 12 | By MS/MS   | By MS/MS | By MS/MS   | By MS/MS   | By MS/MS    | By MS/MS   | By MS/MS | By MS/MS   | By MS/MS   | 19,7   | 112,42 | 0     | 43,00  |
| Q71UI9;P0C055                                                         | Q71UI9;P0C055                                                  | Histone H2A.V;Histone H2A.Z                                                                                                                                                                                                                                                                            | H2AFV;H2AFZ                                                                           | 6  | 4  | 4  | By MS/MS   | By MS/MS   | By matchir | By matchir | By matchir | By matchir | By MS/MS | By MS/MS   | By MS/MS   | By MS/MS    | By MS/MS   | By MS/MS | By MS/MS   | By MS/MS   | 53,9   | 13,51  | 0     | 183,87 |
| Q9P035                                                                | Q9P035                                                         | Very-long-chain (3R) 3-hydroxyacyl-CoA dehydratase 3                                                                                                                                                                                                                                                   | HACD3                                                                                 | 7  | 7  | 7  | By MS/MS   | By MS/MS | By MS/MS   | By MS/MS   | By MS/MS    | By MS/MS   | By MS/MS | By MS/MS   | By MS/MS   | 26,2   | 43,16  | 0     | 20,93  |
| Q16836                                                                | Q16836                                                         | Hydroxyacyl-coenzyme A dehydrogenase, mitochondrial                                                                                                                                                                                                                                                    | HADH                                                                                  | 10 | 10 | 10 | By MS/MS   | By MS/MS | By MS/MS   | By MS/MS   | By MS/MS    | By MS/MS   | By MS/MS | By MS/MS   | By MS/MS   | 61,5   | 34,29  | 0     | 48,09  |
| P40939                                                                | P40939                                                         | Trifunctional enzyme subunit alpha, mitochondrial;Long-chain enoyl-CoA hydratase;Long chain 3-hydroxyacyl-CoA dehydrogenase                                                                                                                                                                            | HADHA                                                                                 | 22 | 22 | 22 | By MS/MS   | By MS/MS | By MS/MS   | By MS/MS   | By MS/MS    | By MS/MS   | By MS/MS | By MS/MS   | By MS/MS   | 39,4   | 83,00  | 0     | 323,31 |
| P55084                                                                | P55084                                                         | Trifunctional enzyme subunit beta, mitochondrial;3-ketoacyl-CoA thiolase                                                                                                                                                                                                                               | HADHB                                                                                 | 18 | 18 | 18 | By MS/MS   | By MS/MS | By MS/MS   | By MS/MS   | By MS/MS    |            |          | By MS/MS   | By MS/MS   | 49,4   | 51,29  | 0     | 108,73 |
| P12081;P49590                                                         | P12081                                                         | Histidine-tRNA ligase, cytoplasmic                                                                                                                                                                                                                                                                     | HARS                                                                                  | 10 | 10 | 10 | By MS/MS   | By MS/MS | By MS/MS   | By MS/MS   | By MS/MS    |            |          | By MS/MS   | By MS/MS   | 26,7   | 57,41  | 0     | 50,04  |
| O14929                                                                | O14929                                                         | Histone acetyltransferase type B catalytic subunit                                                                                                                                                                                                                                                     | HAT1                                                                                  | 11 | 11 | 11 | By MS/MS   | By MS/MS | By MS/MS   | By MS/MS   | By MS/MS    | By MS/MS   | By MS/MS | By MS/MS   | By MS/MS   | 39,9   | 49,51  | 0     | 323,31 |
| P69905                                                                | P69905                                                         | Hemoglobin subunit alpha                                                                                                                                                                                                                                                                               | HBA1                                                                                  | 8  | 4  | 4  | By MS/MS   | By MS/MS | By MS/MS   | By MS/MS   | By MS/MS    | By MS/MS   | By MS/MS | By MS/MS   | By MS/MS   | 83,1   | 15,26  | 0     | 19,29  |
| P02100                                                                | P02100                                                         | Hemoglobin subunit epsilon                                                                                                                                                                                                                                                                             | HBE1                                                                                  | 7  | 5  | 5  | By MS/MS   | By MS/MS | By MS/MS   | By MS/MS   | By MS/MS    | By MS/MS   | By MS/MS | By MS/MS   | By MS/MS   | 57,8   | 16,20  | 0     | 21,43  |
| P69891                                                                | P69891                                                         | Hemoglobin subunit gamma-1                                                                                                                                                                                                                                                                             | HBG1                                                                                  | 16 | 2  | 2  | By MS/MS   | By MS/MS | By MS/MS   | By MS/MS   | By MS/MS    | By MS/MS   | By MS/MS | By MS/MS   | By MS/MS   | 95,2   | 16,14  | 0     | 133,05 |
| P69892                                                                | P69892                                                         | Hemoglobin subunit gamma-2                                                                                                                                                                                                                                                                             | HBG2                                                                                  | 16 | 16 | 2  | By MS/MS   | By MS/MS | By MS/MS   | By MS/MS   | By MS/MS    | By MS/MS   | By MS/MS | By MS/MS   | By MS/MS   | 95,2   | 16,13  | 0     | 323,31 |
| P09105                                                                | P09105                                                         | Hemoglobin subunit theta-1                                                                                                                                                                                                                                                                             | HBO1                                                                                  | 7  | 7  | 7  | By MS/MS   | By MS/MS | By MS/MS   | By MS/MS   | By MS/MS    | By MS/MS   | By MS/MS | By MS/MS   | By MS/MS   | 64,1   | 15,51  | 0     | 18,55  |
| Q9Y450                                                                | Q9Y450                                                         | HBS1-like protein                                                                                                                                                                                                                                                                                      | HBS1L                                                                                 | 8  | 8  | 8  | By MS/MS   | By MS/MS | By MS/MS   | By MS/MS   | By MS/MS    | By MS/MS   | By MS/MS | By MS/MS   | By MS/MS   | 20,3   | 75,47  | 0     | 39,39  |
| P02008                                                                | P02008                                                         | Hemoglobin subunit zeta                                                                                                                                                                                                                                                                                | HBZ                                                                                   | 12 | 12 | 11 | By MS/MS   | By MS/MS | By MS/MS   | By MS/MS   | By MS/MS    | By MS/MS   | By MS/MS | By MS/MS   | By MS/MS   | 93,0   | 15,64  | 0     | 323,31 |
| P51610                                                                | P51610                                                         | Host cell factor 1;HCF N-terminal chain 1;HCF N-terminal chain 2;HCF N-terminal chain 3;HCF N-terminal chain 4;HCF N-terminal chain 5;HCF N-terminal chain 6;HCF C-terminal chain 1;HCF C-terminal chain 2;HCF C-terminal chain 3;HCF C-terminal chain 4;HCF C-terminal chain 5;HCF C-terminal chain 6 | HCFC1                                                                                 | 12 | 12 | 12 | By MS/MS   | By MS/MS | By MS/MS   | By MS/MS   | By MS/MS    |            |          | By MS/MS   | By MS/MS   | 10,5   | 208,73 | 0     | 24,49  |
| Q13547                                                                | Q13547                                                         | Histone deacetylase 1                                                                                                                                                                                                                                                                                  | HDAC1                                                                                 | 6  | 4  | 4  | By matchir | By matchir | By MS/MS   | By MS/MS   | By MS/MS   | By MS/MS   | By MS/MS | By matchir | By matchir | By matchir  | By matchir | By MS/MS | By matchir | By matchir | 20,7   | 55,10  | 0     | 12,73  |
| Q92769                                                                | Q92769                                                         | Histone deacetylase 2                                                                                                                                                                                                                                                                                  | HDAC2                                                                                 | 7  | 7  | 5  | By MS/MS   | By MS/MS | By MS/MS   | By MS/MS   | By MS/MS    | By MS/MS   | By MS/MS | By MS/MS   | By MS/MS   | 19,9   | 55,36  | 0     | 40,07  |
| Q724H3                                                                | Q724H3                                                         | HD domain-containing protein 2                                                                                                                                                                                                                                                                         | HDDC2                                                                                 | 6  | 6  | 6  | By MS/MS   | By MS/MS | By MS/MS   | By MS/MS   | By MS/MS    | By MS/MS   | By MS/MS | By MS/MS   | By MS/MS   | 35,8   | 23,39  | 0     | 25,54  |
| Q8N4P3                                                                | Q8N4P3                                                         | Guanosine-3,5-bis(diphosphate) 3-pyrophosphohydrolase MESH1                                                                                                                                                                                                                                            | HDDC3                                                                                 | 5  | 5  | 5  | By MS/MS   | By MS/MS |            |            | By MS/MS    |            |          |            | 31,8       | 20,33  | 0      | 26,98 |        |
| P51858                                                                | P51858                                                         | Hepatoma-derived growth factor                                                                                                                                                                                                                                                                         | HDGF                                                                                  | 12 | 12 | 12 | By MS/MS   | By MS/MS | By MS/MS   | By MS/MS   | By MS/MS    | By MS/MS   | By MS/MS | By MS/MS   | By MS/MS   | 64,2   | 26,79  | 0     | 125,75 |
| P07686                                                                | P07686                                                         | Beta-hexosaminidase subunit beta;Beta-hexosaminidase subunit beta chain B;Beta-hexosaminidase subunit beta chain A                                                                                                                                                                                     | HEXB                                                                                  | 8  | 8  | 8  | By MS/MS   | By MS/MS | By MS/MS   | By MS/MS   | By MS/MS    | By MS/MS   | By MS/MS | By MS/MS   | By MS/MS   | 21,9   | 63,11  | 0     | 46,95  |
| Q98TY7                                                                | Q98TY7                                                         | Protein HGH1 homolog                                                                                                                                                                                                                                                                                   | HGH1                                                                                  | 6  | 6  | 6  | By MS/MS   | By MS/MS | By MS/MS   | By MS/MS   | By MS/MS    |            |          | By MS/MS   |            | 31,0   | 42,13  | 0     | 14,16  |
| P31937                                                                | P31937                                                         | 3-hydroxyisobutyrate dehydrogenase, mitochondrial                                                                                                                                                                                                                                                      | HIBADH                                                                                | 4  | 4  | 4  | By MS/MS   | By MS/MS | By MS/MS   | By MS/MS   | By MS/MS    | By MS/MS   |          | By MS/MS   |            | 19,9   | 35,33  | 0     | 190,51 |
| Q6NVY1                                                                | Q6NVY1                                                         | 3-hydroxyisobutyryl-CoA hydrolase, mitochondrial                                                                                                                                                                                                                                                       | HIBCCH                                                                                | 8  | 8  | 8  | By MS/MS   | By MS/MS   |            | By MS/MS   | By MS/MS   | By MS/MS   | By MS/MS | By MS/MS   | By MS/MS   | By MS/MS    | By MS/MS   | By MS/MS |            |            | 27,5   | 43,48  | 0     | 14,49  |
| P49773                                                                | P49773                                                         | Histidine triad nucleotide-binding protein 1                                                                                                                                                                                                                                                           | HINT1                                                                                 | 10 | 10 | 10 | By MS/MS   | By MS/MS | By MS/MS   | By MS/MS   | By MS/MS    | By MS/MS   | By MS/MS | By MS/MS   | By MS/MS   | 87,3   | 13,80  | 0     | 40,59  |
| Q9BX68                                                                | Q9BX68                                                         | Histidine triad nucleotide-binding protein 2, mitochondrial                                                                                                                                                                                                                                            | HINT2                                                                                 | 5  | 5  | 5  | By MS/MS   | By MS/MS |            |            | By MS/MS    |            |          | By MS/MS   |            | 52,1   | 17,16  | 0     | 19,80  |
| P16402                                                                | P16402                                                         | Histone H1.3                                                                                                                                                                                                                                                                                           | HIST1H1D                                                                              | 10 | 3  | 3  | By MS/MS   | By matchir | By MS/MS   | By MS/MS   | By MS/MS   | By MS/MS   | By MS/MS | By MS/MS   | By MS/MS   | By MS/MS    | By MS/MS   | By MS/MS | By MS/MS   | By MS/MS   | 30,3   | 22,35  | 0     | 13,54  |
| P10412;P22492;Q02539                                                  | P10412                                                         | Histone H1.4                                                                                                                                                                                                                                                                                           | HIST1H1E                                                                              | 10 | 10 | 3  | By MS/MS   | By MS/MS | By MS/MS   | By MS/MS   | By MS/MS    | By MS/MS   | By MS/MS | By MS/MS   | By MS/MS   | 26,9   | 21,87  | 0     | 62,57  |
| Q99879;Q99877;Q93079;Q5QNW6;P62807;P58876;O60814;Q99880;P57053;Q96A08 | Q99879;Q99877;Q93079;Q5QNW6;P62807;P58876;O60814;Q99880;P57053 | Histone H2B type 1-M;Histone H2B type 1-N;Histone H2B type 1-H;Histone H2B type 2-F;Histone H2B type 1-C/E/F/G/I;Histone H2B type 1-D;Histone H2B type 1-K;Histone H2B type 1-L;Histone H2B type F-S                                                                                                   | HIST1H2BM;HIST1H2BN;HIST1H2BH;HIST2H2BF;HIST1H2BC;HIST1H2BD;HIST1H2BK;HIST1H2BL;H2BF5 | 11 | 11 | 3  | By MS/MS   | By MS/MS | By MS/MS   | By MS/MS   | By MS/MS    | By MS/MS   | By MS/MS | By MS/MS   | By MS/MS   | 65,1   | 13,99  | 0     | 323,31 |
| P62805                                                                | P62805                                                         | Histone H4                                                                                                                                                                                                                                                                                             | HIST1H4A                                                                              | 17 | 17 | 17 | By MS/MS   | By MS/MS | By MS/MS   | By MS/MS   | By MS/MS    | By MS/MS   | By MS/MS | By MS/MS   | By MS/MS   | 68,0   | 11,37  | 0     | 323,31 |
| Q71D13;Q16695;P84243;P68431;Q6NXT2                                    | Q71D13;Q16695;P84243;P68431;Q6NXT2                             | Histone H3.2;Histone H3.1t;Histone H3.3;Histone H3.1;Histone H3.3C                                                                                                                                                                                                                                     | HIST2H3A;HIST3H3;H3F3A;HIST1H3A;H3F3C                                                 | 4  | 4  | 4  | By MS/MS   | By MS/MS | By MS/MS   | By MS/MS   | By MS/MS    | By MS/MS   | By MS/MS | By MS/MS   | By MS/MS   | 19,9   | 15,39  | 0     | 8,79   |
| P19367;Q2T890                                                         | P19367                                                         | Hexokinase-1                                                                                                                                                                                                                                                                                           | HK1                                                                                   | 34 | 34 | 31 | By MS/MS   | By MS/MS | By MS/MS   | By MS/MS   | By MS/MS    | By MS/MS   | By MS/MS | By MS/MS   | By MS/MS   | 41,8   | 102,48 | 0     | 248,70 |
| P52789;P52790                                                         | P52789                                                         | Hexokinase-2                                                                                                                                                                                                                                                                                           | HK2                                                                                   | 20 | 17 | 17 | By MS/MS   | By MS/MS | By MS/MS   | By MS/MS   | By matching | By MS/MS   |          |            | 27,5       | 102,38 | 0      | 44,60 |        |
| Q8TC19                                                                | Q8TC19                                                         | Minor histocompatibility antigen H13                                                                                                                                                                                                                                                                   | HMI13                                                                                 | 6  | 6  | 6  | By MS/MS   |            |            | By MS/MS   | By MS/MS   | By MS/MS   | By MS/MS | By MS/MS   | By MS/MS   | By MS/MS    | By MS/MS   | By MS/MS |            |            | 26,3   | 41,49  | 0     | 8,93   |
| P08397                                                                | P08397                                                         | Porphobilinogen deaminase                                                                                                                                                                                                                                                                              | HMB5                                                                                  | 15 | 15 | 15 | By MS/MS   | By MS/MS | By MS/MS   | By MS/MS   | By MS/MS    | By MS/MS   | By MS/MS | By MS/MS   | By MS/MS   | 56,2   | 39,33  | 0     | 323,31 |
| P09429;B2RPK0;P23497                                                  | P09429                                                         | High mobility group protein B1                                                                                                                                                                                                                                                                         | HMGGB1                                                                                | 19 | 19 | 16 | By MS/MS   | By MS/MS | By MS/MS   | By MS/MS   | By MS/MS    | By MS/MS   | By MS/MS | By MS/MS   | By MS/MS   | 55,8   | 24,89  | 0     | 115,84 |
| P26583                                                                | P26583                                                         | High mobility group protein B2                                                                                                                                                                                                                                                                         | HMGGB2                                                                                | 13 | 10 | 10 | By MS/MS   | By MS/MS | By MS/MS   | By MS/MS   | By MS/MS    | By MS/MS   | By MS/MS | By MS/MS   | By MS/MS   | 41,1   | 24,03  | 0     | 31,24  |
| O15347                                                                | O15347                                                         | High mobility group protein B3                                                                                                                                                                                                                                                                         | HMGGB3                                                                                | 4  | 4  | 4  | By MS/MS   | By MS/MS   |            |            |            |            | By MS/MS |            | By MS/MS   |             | By MS/MS   | By MS/MS | By MS/MS   |            | 27,0   | 22,98  | 0     | 3,91   |
| Q01581;P54868                                                         | Q01581                                                         | Hydroxymethylglutaryl-CoA synthase, cytoplasmic                                                                                                                                                                                                                                                        | HMGCS1                                                                                | 21 | 21 | 21 | By MS/MS   | By MS/MS | By MS/MS   | By MS/MS   | By MS/MS    |            | By MS/MS | By MS/MS   |            | 65,0   | 57,29  | 0     | 321,40 |
| P30519                                                                | P30519                                                         | Heme oxygenase 2                                                                                                                                                                                                                                                                                       | HMOX2                                                                                 | 7  | 7  | 7  | By MS/MS   | By MS/MS |            |            |             |            |          |            |            |        |        |       |        |

[illegible]

[illegible]

|               |               |                                                           |             |    |    |    |          |          |          |          |          |          |          |          |          |          |          |          |          |      |        |   |        |
|---------------|---------------|-----------------------------------------------------------|-------------|----|----|----|----------|----------|----------|----------|----------|----------|----------|----------|----------|----------|----------|----------|----------|------|--------|---|--------|
| Q68D91        | Q68D91        | Metallo-beta-lactamase domain-containing protein 2        | MBLAC2      | 4  | 4  | 4  |          |          | By MS/MS | 20,4 | 31,37  | 0 | 8,45   |
| Q9HCC0        | Q9HCC0        | Methylcrotonoyl-CoA carboxylase beta chain, mitochondrial | MCCC2       | 8  | 8  | 8  |          | By MS/MS | 23,3 | 61,33  | 0 | 164,11 |
| P49736        | P49736        | DNA replication licensing factor MCM2                     | MCM2        | 32 | 32 | 32 | By MS/MS | 47,1 | 101,89 | 0 | 323,31 |
| P25205        | P25205        | DNA replication licensing factor MCM3                     | MCM3        | 34 | 34 | 34 | By MS/MS | 45,2 | 90,98  | 0 | 323,31 |
| P33991        | P33991        | DNA replication licensing factor MCM4                     | MCM4        | 23 | 23 | 23 | By MS/MS | 34,8 | 96,56  | 0 | 323,31 |
| P33992        | P33992        | DNA replication licensing factor MCM5                     | MCM5        | 15 | 15 | 15 | By MS/MS | 28,9 | 82,29  | 0 | 117,90 |
| Q14566        | Q14566        | DNA replication licensing factor MCM6                     | MCM6        | 31 | 31 | 31 | By MS/MS | 49,2 | 92,89  | 0 | 323,31 |
| P33993        | P33993        | DNA replication licensing factor MCM7                     | MCM7        | 29 | 29 | 29 | By MS/MS | 50,9 | 81,31  | 0 | 197,83 |
| Q9ULC4        | Q9ULC4        | Malignant T-cell-amplified sequence 1                     | MCTS1       | 10 | 10 | 10 | By MS/MS | 57,5 | 20,56  | 0 | 259,40 |
| P40925        | P40925        | Malate dehydrogenase, cytoplasmic                         | MDH1        | 15 | 15 | 15 | By MS/MS | 49,7 | 36,43  | 0 | 278,56 |
| P40926        | P40926        | Malate dehydrogenase, mitochondrial                       | MDH2        | 23 | 23 | 23 | By MS/MS | 66,6 | 35,50  | 0 | 323,31 |
| Q9NU22        | Q9NU22        | Midasin                                                   | MDN1        | 12 | 12 | 12 | By MS/MS | 3,4  | 632,81 | 0 | 22,68  |
| P48163        | P48163        | NADP-dependent malic enzyme                               | ME1         | 5  | 5  | 5  | By MS/MS | 17,7 | 64,15  | 0 | 22,20  |
| P23368        | P23368        | NAD-dependent malic enzyme, mitochondrial                 | ME2         | 5  | 5  | 5  | By MS/MS | 21,2 | 65,44  | 0 | 59,56  |
| Q9Y316        | Q9Y316        | Protein MEMO1                                             | MEMO1       | 10 | 10 | 10 | By MS/MS | 45,8 | 33,73  | 0 | 99,85  |
| P50579        | P50579        | Methionine aminopeptidase 2                               | METAP2      | 10 | 10 | 10 | By MS/MS | 31,2 | 52,89  | 0 | 74,07  |
| O14880        | O14880        | Microsomal glutathione S-transferase 3                    | MGST3       | 5  | 5  | 5  | By MS/MS | 52,6 | 16,52  | 0 | 47,59  |
| P14174        | P14174        | Macrophage migration inhibitory factor                    | MIF         | 4  | 4  | 4  | By MS/MS | 36,5 | 12,48  | 0 | 316,21 |
| Q14165        | Q14165        | Malectin                                                  | MLEC        | 8  | 8  | 8  | By MS/MS | 34,9 | 32,23  | 0 | 29,51  |
| Q9H859;Q7L9L4 | Q9H859;Q7L9L4 | MOB kinase activator 1A;MOB kinase activator 1B           | MOB1A;MOB1B | 5  | 5  | 5  | By MS/MS | 23,6 | 25,08  | 0 | 14,09  |
| Q13724        | Q13724        | Mannosyl-oligosaccharide glucosidase                      | MOGS        | 4  | 4  | 4  | By MS/MS | 7,6  | 91,92  | 0 | 32,32  |
| Q9Y5U8        | Q9Y5U8        | Mitochondrial pyruvate carrier 1                          | MPC1        | 4  | 4  | 4  | By MS/MS | 63,3 | 12,35  | 0 | 7,89   |
| Q9Y563        | Q9Y563        | Mitochondrial pyruvate carrier 2                          | MPC2        | 6  | 6  | 6  | By MS/MS | 53,5 | 14,28  | 0 | 14,65  |
| Q00013        | Q00013        | 5S kDa erythrocyte membrane protein                       | MPP1        | 13 | 13 | 13 | By MS/MS | 43,1 | 52,30  | 0 | 223,17 |
| P25325        | P25325        | 3-mercaptopropylate sulfurtransferase                     | MPTST       | 4  | 4  | 4  | By MS/MS | 26,9 | 33,18  | 0 | 65,29  |
| P49959        | P49959        | Double-strand break repair protein MRE11A                 | MRE11A      | 7  | 7  | 7  | By MS/MS | 14,4 | 80,59  | 0 | 10,39  |
| Q9BYD6        | Q9BYD6        | 39S ribosomal protein L11, mitochondrial                  | MRPL1       | 7  | 7  | 7  | By MS/MS | 35,4 | 36,91  | 0 | 49,93  |
| Q9Y3B7        | Q9Y3B7        | 39S ribosomal protein L11, mitochondrial                  | MRPL11      | 11 | 11 | 11 | By MS/MS | 57,8 | 20,68  | 0 | 74,09  |
| P52815        | P52815        | 39S ribosomal protein L12, mitochondrial                  | MRPL12      | 7  | 7  | 7  | By MS/MS | 52,0 | 21,35  | 0 | 85,98  |
| Q9BYD1        | Q9BYD1        | 39S ribosomal protein L13, mitochondrial                  | MRPL13      | 8  | 8  | 8  | By MS/MS | 52,8 | 20,69  | 0 | 13,42  |
| Q6P1L8        | Q6P1L8        | 39S ribosomal protein L14, mitochondrial                  | MRPL14      | 5  | 5  | 5  | By MS/MS | 42,8 | 15,95  | 0 | 96,08  |
| Q9P015        | Q9P015        | 39S ribosomal protein L15, mitochondrial                  | MRPL15      | 11 | 11 | 11 | By MS/MS | 45,3 | 33,42  | 0 | 82,61  |
| Q9NRX2        | Q9NRX2        | 39S ribosomal protein L17, mitochondrial                  | MRPL17      | 7  | 7  | 7  | By MS/MS | 36,6 | 20,05  | 0 | 12,45  |
| P49406        | P49406        | 39S ribosomal protein L19, mitochondrial                  | MRPL19      | 4  | 4  | 4  | By MS/MS | 14,4 | 33,54  | 0 | 5,90   |
| Q9BYC9        | Q9BYC9        | 39S ribosomal protein L20, mitochondrial                  | MRPL20      | 5  | 5  | 5  | By MS/MS | 34,9 | 17,44  | 0 | 6,97   |
| Q9NWU5        | Q9NWU5        | 39S ribosomal protein L22, mitochondrial                  | MRPL22      | 6  | 6  | 6  | By MS/MS | 32,0 | 23,64  | 0 | 25,46  |
| Q16540        | Q16540        | 39S ribosomal protein L23, mitochondrial                  | MRPL23      | 4  | 4  | 4  | By MS/MS | 35,3 | 17,78  | 0 | 31,77  |
| Q96A35        | Q96A35        | 39S ribosomal protein L24, mitochondrial                  | MRPL24      | 6  | 6  | 6  | By MS/MS | 38,9 | 24,92  | 0 | 8,63   |
| Q9P0M9        | Q9P0M9        | 39S ribosomal protein L27, mitochondrial                  | MRPL27      | 4  | 4  | 4  | By MS/MS | 35,1 | 16,07  | 0 | 19,00  |
| Q13084        | Q13084        | 39S ribosomal protein L28, mitochondrial                  | MRPL28      | 4  | 4  | 4  | By MS/MS | 21,5 | 30,16  | 0 | 7,98   |
| Q9BZ1         | Q9BZ1         | 39S ribosomal protein L37, mitochondrial                  | MRPL37      | 6  | 6  | 6  | By MS/MS | 23,2 | 48,12  | 0 | 16,80  |
| Q9NQ50        | Q9NQ50        | 39S ribosomal protein L40, mitochondrial                  | MRPL40      | 5  | 5  | 5  | By MS/MS | 34,5 | 24,49  | 0 | 11,21  |
| Q8IXM3        | Q8IXM3        | 39S ribosomal protein L41, mitochondrial                  | MRPL41      | 5  | 5  | 5  | By MS/MS | 33,6 | 15,38  | 0 | 9,57   |
| Q8N983        | Q8N983        | 39S ribosomal protein L43, mitochondrial                  | MRPL43      | 5  | 5  | 5  | By MS/MS | 30,7 | 23,43  | 0 | 19,67  |
| Q9H9J2        | Q9H9J2        | 39S ribosomal protein L44, mitochondrial                  | MRPL44      | 5  | 5  | 5  | By MS/MS | 23,8 | 37,54  | 0 | 78,58  |
| Q9HD33        | Q9HD33        | 39S ribosomal protein L47, mitochondrial                  | MRPL47      | 7  | 7  | 7  | By MS/MS | 24,0 | 29,45  | 0 | 20,49  |
| Q8NSN7        | Q8NSN7        | 39S ribosomal protein L50, mitochondrial                  | MRPL50      | 4  | 4  | 4  | By MS/MS | 24,7 | 18,33  | 0 | 9,75   |
| Q96EL3        | Q96EL3        | 39S ribosomal protein L53, mitochondrial                  | MRPL53      | 4  | 4  | 4  | By MS/MS | 37,5 | 12,11  | 0 | 20,61  |
| Q9BYD2        | Q9BYD2        | 39S ribosomal protein L9, mitochondrial                   | MRPL9       | 4  | 4  | 4  | By MS/MS | 21,0 | 30,24  | 0 | 112,15 |
| P82664        | P82664        | 28S ribosomal protein S10, mitochondrial                  | MRPS10      | 7  | 7  | 7  | By MS/MS | 30,8 | 23,00  | 0 | 44,33  |
| Q9Y2R5        | Q9Y2R5        | 28S ribosomal protein S17, mitochondrial                  | MRPS17      | 4  | 4  | 4  | By MS/MS | 51,5 | 14,50  | 0 | 45,98  |
| Q9Y676        | Q9Y676        | 28S ribosomal protein S18b, mitochondrial                 | MRPS18B     | 5  | 5  | 5  | By MS/MS | 32,9 | 29,40  | 0 | 27,92  |
| P82650        | P82650        | 28S ribosomal protein S22, mitochondrial                  | MRPS22      | 13 | 13 | 13 | By MS/MS | 41,4 | 41,28  | 0 | 33,34  |
| P82663        | P82663        | 28S ribosomal protein S25, mitochondrial                  | MRPS25      | 7  | 7  | 7  | By MS/MS | 41,6 | 20,12  | 0 | 26,68  |
| Q92552        | Q92552        | 28S ribosomal protein S27, mitochondrial                  | MRPS27      | 7  | 7  | 7  | By MS/MS | 21,7 | 47,61  | 0 | 34,85  |
| Q9Y2Q9        | Q9Y2Q9        | 28S ribosomal protein S28, mitochondrial                  | MRPS28      | 5  | 5  | 5  | By MS/MS | 29,9 | 20,84  | 0 | 24,39  |
| Q92665        | Q92665        | 28S ribosomal protein S                                   |             |    |    |    |          |          |          |          |          |          |          |          |          |          |          |          |          |      |        |   |        |

|                      |               |                                                                                                                                                                                    |               |    |    |    |          |          |            |            |          |            |            |            |          |          |            |            |            |            |      |        |   |        |
|----------------------|---------------|------------------------------------------------------------------------------------------------------------------------------------------------------------------------------------|---------------|----|----|----|----------|----------|------------|------------|----------|------------|------------|------------|----------|----------|------------|------------|------------|------------|------|--------|---|--------|
| Q6UB35               | Q6UB35        | Monofunctional C1-tetrahydrofolate synthase, mitochondrial                                                                                                                         | MTHFD1L       | 13 | 13 | 13 | By MS/MS | By MS/MS | By MS/MS   | By MS/MS   | By MS/MS | By MS/MS   | By MS/MS   | By MS/MS   | By MS/MS | By MS/MS | By MS/MS   | By MS/MS   | By MS/MS   | By MS/MS   | 18,4 | 105,79 | 0 | 95,70  |
| P13995               | P13995        | Bifunctional methylenetetrahydrofolate dehydrogenase/cyclohydrolase, mitochondrial; NAD-dependent methylenetetrahydrofolate dehydrogenase; Methenyltetrahydrofolate cyclohydrolase | MTHFD2        | 7  | 7  | 7  | By MS/MS | By MS/MS | By MS/MS   | By MS/MS   | By MS/MS | By MS/MS   | By MS/MS   | By MS/MS   | By MS/MS | By MS/MS | By MS/MS   | By MS/MS   | By MS/MS   | By MS/MS   | 40,3 | 37,90  | 0 | 53,16  |
| P42345               | P42345        | Serine/threonine-protein kinase mTOR                                                                                                                                               | MTOR          | 14 | 14 | 14 | By MS/MS | By MS/MS | By MS/MS   | By MS/MS   | By MS/MS | By MS/MS   | By MS/MS   | By MS/MS   | By MS/MS | By MS/MS | By MS/MS   | By MS/MS   | By MS/MS   | By MS/MS   | 9,8  | 288,89 | 0 | 40,76  |
| P58546               | P58546        | Myotrophin                                                                                                                                                                         | MTPN          | 8  | 8  | 8  | By MS/MS | By MS/MS | By MS/MS   | By MS/MS   | By MS/MS | By MS/MS   | By MS/MS   | By MS/MS   | By MS/MS | By MS/MS | By MS/MS   | By MS/MS   | By MS/MS   | By MS/MS   | 68,6 | 12,90  | 0 | 323,31 |
| Q13505               | Q13505        | Metaxin-1                                                                                                                                                                          | MTX1          | 7  | 7  | 7  | By MS/MS | By MS/MS | By MS/MS   | By MS/MS   | By MS/MS | By MS/MS   | By MS/MS   | By MS/MS   | By MS/MS | By MS/MS | By MS/MS   | By MS/MS   | By MS/MS   | By MS/MS   | 18,9 | 51,48  | 0 | 68,75  |
| Q75431               | Q75431        | Metaxin-2                                                                                                                                                                          | MTX2          | 5  | 5  | 5  | By MS/MS | By MS/MS | By MS/MS   | By MS/MS   | By MS/MS | By MS/MS   | By MS/MS   | By MS/MS   | By MS/MS | By MS/MS | By MS/MS   | By MS/MS   | By MS/MS   | By MS/MS   | 33,8 | 29,76  | 0 | 51,55  |
| P53602               | P53602        | Diphosphomevalonate decarboxylase                                                                                                                                                  | MVD           | 7  | 7  | 7  | By MS/MS | By MS/MS | By MS/MS   | By MS/MS   | By MS/MS | By MS/MS   | By MS/MS   | By MS/MS   | By MS/MS | By MS/MS | By MS/MS   | By MS/MS   | By MS/MS   | By MS/MS   | 39,8 | 43,40  | 0 | 33,27  |
| Q9BQ60               | Q9BQ60        | Myb-binding protein 1A                                                                                                                                                             | MYBBP1A       | 24 | 24 | 24 | By MS/MS | By MS/MS | By MS/MS   | By MS/MS   | By MS/MS | By MS/MS   | By MS/MS   | By MS/MS   | By MS/MS | By MS/MS | By MS/MS   | By MS/MS   | By MS/MS   | By MS/MS   | 26,8 | 148,85 | 0 | 62,78  |
| Q969H8               | Q969H8        | Myeloid-derived growth factor                                                                                                                                                      | MYDGF         | 6  | 6  | 6  | By MS/MS | By MS/MS | By MS/MS   | By MS/MS   | By MS/MS | By MS/MS   | By MS/MS   | By MS/MS   | By MS/MS | By MS/MS | By MS/MS   | By MS/MS   | By MS/MS   | By MS/MS   | 42,8 | 18,80  | 0 | 22,99  |
| P35580               | P35580        | Myosin-10                                                                                                                                                                          | MYH10         | 52 | 52 | 40 | By MS/MS | By MS/MS | By MS/MS   | By MS/MS   | By MS/MS | By MS/MS   | By MS/MS   | By MS/MS   | By MS/MS | By MS/MS | By MS/MS   | By MS/MS   | By MS/MS   | By MS/MS   | 35,3 | 229,00 | 0 | 323,31 |
| Q72406               | Q72406        | Myosin-14                                                                                                                                                                          | MYH14         | 6  | 2  | 2  | By MS/MS | By MS/MS | By matchin | By matchin | By MS/MS | By matchin | By matchin | By matchin | By MS/MS | By MS/MS | By matchin | By matchin | By matchin | By matchin | 3,6  | 227,87 | 0 | 3,21   |
| P35579               | P35579        | Myosin-9                                                                                                                                                                           | MYH9          | 40 | 32 | 29 | By MS/MS | By MS/MS | By MS/MS   | By MS/MS   | By MS/MS | By MS/MS   | By MS/MS   | By MS/MS   | By MS/MS | By MS/MS | By MS/MS   | By MS/MS   | By MS/MS   | By MS/MS   | 26,6 | 226,53 | 0 | 323,31 |
| P19105;O14950;P24844 | P19105;O14950 | Myosin regulatory light chain 12A; Myosin regulatory light chain 12B                                                                                                               | MYL12A;MYL12B | 9  | 9  | 9  | By MS/MS | By MS/MS | By MS/MS   | By MS/MS   | By MS/MS | By MS/MS   | By MS/MS   | By MS/MS   | By MS/MS | By MS/MS | By MS/MS   | By MS/MS   | By MS/MS   | By MS/MS   | 63,2 | 19,79  | 0 | 323,31 |
| P12829;P08590        | P12829        | Myosin light chain 4                                                                                                                                                               | MYL4          | 11 | 11 | 11 | By MS/MS | By MS/MS | By MS/MS   | By MS/MS   | By MS/MS | By MS/MS   | By MS/MS   | By MS/MS   | By MS/MS | By MS/MS | By MS/MS   | By MS/MS   | By MS/MS   | By MS/MS   | 65,5 | 21,56  | 0 | 39,02  |
| P60660;P14649        | P60660        | Myosin light polypeptide 6                                                                                                                                                         | MYL6          | 8  | 8  | 8  | By MS/MS | By MS/MS | By MS/MS   | By MS/MS   | By MS/MS | By MS/MS   | By MS/MS   | By MS/MS   | By MS/MS | By MS/MS | By MS/MS   | By MS/MS   | By MS/MS   | By MS/MS   | 55,6 | 16,93  | 0 | 38,58  |
| P41227;Q9BSU3        | P41227        | N-alpha-acetyltransferase 10                                                                                                                                                       | NAA10         | 8  | 8  | 8  | By MS/MS | By MS/MS | By MS/MS   | By MS/MS   | By MS/MS | By MS/MS   | By MS/MS   | By MS/MS   | By MS/MS | By MS/MS | By MS/MS   | By MS/MS   | By MS/MS   | By MS/MS   | 43,8 | 26,46  | 0 | 138,21 |
| Q9BXJ9;Q6N069        | Q9BXJ9        | N-alpha-acetyltransferase 15, NatA auxiliary subunit                                                                                                                               | NAA15         | 24 | 24 | 24 | By MS/MS | By MS/MS | By MS/MS   | By MS/MS   | By MS/MS | By MS/MS   | By MS/MS   | By MS/MS   | By MS/MS | By MS/MS | By MS/MS   | By MS/MS   | By MS/MS   | By MS/MS   | 39,6 | 101,27 | 0 | 124,47 |
| Q14CX7               | Q14CX7        | N-alpha-acetyltransferase 25, NatB auxiliary subunit                                                                                                                               | NAA25         | 5  | 5  | 5  | By MS/MS | By MS/MS | By MS/MS   | By MS/MS   | By MS/MS | By MS/MS   | By MS/MS   | By MS/MS   | By MS/MS | By MS/MS | By MS/MS   | By MS/MS   | By MS/MS   | By MS/MS   | 5,6  | 112,29 | 0 | 6,48   |
| Q9GZ21               | Q9GZ21        | N-alpha-acetyltransferase 50                                                                                                                                                       | NAA50         | 14 | 14 | 14 | By MS/MS | By MS/MS | By MS/MS   | By MS/MS   | By MS/MS | By MS/MS   | By MS/MS   | By MS/MS   | By MS/MS | By MS/MS | By MS/MS   | By MS/MS   | By MS/MS   | By MS/MS   | 69,2 | 19,40  | 0 | 51,32  |
| Q13765;E9PAV3        | Q13765;E9PAV3 | Nascent polypeptide-associated complex subunit alpha; Nascent polypeptide-associated complex subunit alpha, muscle-specific form                                                   | NACA          | 8  | 8  | 6  | By MS/MS | By MS/MS | By MS/MS   | By MS/MS   | By MS/MS | By MS/MS   | By MS/MS   | By MS/MS   | By MS/MS | By MS/MS | By MS/MS   | By MS/MS   | By MS/MS   | By MS/MS   | 34,9 | 23,38  | 0 | 323,31 |
| Q4G0N4               | Q4G0N4        | NAD kinase 2, mitochondrial                                                                                                                                                        | NADK2         | 8  | 8  | 8  | By MS/MS | By MS/MS | By MS/MS   | By MS/MS   | By MS/MS | By MS/MS   | By MS/MS   | By MS/MS   | By MS/MS | By MS/MS | By MS/MS   | By MS/MS   | By MS/MS   | By MS/MS   | 25,3 | 49,43  | 0 | 158,85 |
| Q13564               | Q13564        | NEDD8-activating enzyme E1 regulatory subunit                                                                                                                                      | NAE1          | 6  | 6  | 6  | By MS/MS | By MS/MS | By MS/MS   | By MS/MS   | By MS/MS | By MS/MS   | By MS/MS   | By MS/MS   | By MS/MS | By MS/MS | By MS/MS   | By MS/MS   | By MS/MS   | By MS/MS   | 21,7 | 60,25  | 0 | 82,17  |
| P43490               | P43490        | Nicotinamide phosphoribosyltransferase                                                                                                                                             | NAMPT         | 20 | 20 | 20 | By MS/MS | By MS/MS | By MS/MS   | By MS/MS   | By MS/MS | By MS/MS   | By MS/MS   | By MS/MS   | By MS/MS | By MS/MS | By MS/MS   | By MS/MS   | By MS/MS   | By MS/MS   | 60,5 | 55,52  | 0 | 168,63 |
| Q9NR45               | Q9NR45        | Sialic acid synthase                                                                                                                                                               | NAN5          | 9  | 9  | 9  | By MS/MS | By MS/MS | By MS/MS   | By MS/MS   | By MS/MS | By MS/MS   | By MS/MS   | By MS/MS   | By MS/MS | By MS/MS | By MS/MS   | By MS/MS   | By MS/MS   | By MS/MS   | 47,4 | 40,31  | 0 | 80,78  |
| P55209               | P55209        | Nucleosome assembly protein 1-like 1                                                                                                                                               | NAP1L1        | 14 | 14 | 12 | By MS/MS | By MS/MS | By MS/MS   | By MS/MS   | By MS/MS | By MS/MS   | By MS/MS   | By MS/MS   | By MS/MS | By MS/MS | By MS/MS   | By MS/MS   | By MS/MS   | By MS/MS   | 53,5 | 45,37  | 0 | 256,84 |
| Q99733               | Q99733        | Nucleosome assembly protein 1-like 4                                                                                                                                               | NAP1L4        | 12 | 10 | 10 | By MS/MS | By MS/MS | By MS/MS   | By MS/MS   | By MS/MS | By MS/MS   | By MS/MS   | By MS/MS   | By MS/MS | By MS/MS | By MS/MS   | By MS/MS   | By MS/MS   | By MS/MS   | 32,8 | 42,82  | 0 | 323,31 |
| P54920;Q9H115        | P54920        | Alpha-soluble NSF attachment protein                                                                                                                                               | NAPA          | 19 | 19 | 19 | By MS/MS | By MS/MS | By MS/MS   | By MS/MS   | By MS/MS | By MS/MS   | By MS/MS   | By MS/MS   | By MS/MS | By MS/MS | By MS/MS   | By MS/MS   | By MS/MS   | By MS/MS   | 79,7 | 33,23  | 0 | 241,01 |
| Q43776               | Q43776        | Asparagine--tRNA ligase, cytoplasmic                                                                                                                                               | NARS          | 21 | 21 | 21 | By MS/MS | By MS/MS | By MS/MS   | By MS/MS   | By MS/MS | By MS/MS   | By MS/MS   | By MS/MS   | By MS/MS | By MS/MS | By MS/MS   | By MS/MS   | By MS/MS   | By MS/MS   | 42,2 | 62,94  | 0 | 235,64 |
| P49321               | P49321        | Nuclear autoantigenic sperm protein                                                                                                                                                | NASP          | 29 | 29 | 29 | By MS/MS | By MS/MS | By MS/MS   | By MS/MS   | By MS/MS | By MS/MS   | By MS/MS   | By MS/MS   | By MS/MS | By MS/MS | By MS/MS   | By MS/MS   | By MS/MS   | By MS/MS   | 57,6 | 85,24  | 0 | 323,31 |
| Q9H0A0               | Q9H0A0        | N-acetyltransferase 10                                                                                                                                                             | NAT10         | 18 | 18 | 18 | By MS/MS | By MS/MS | By MS/MS   | By MS/MS   | By MS/MS | By MS/MS   | By MS/MS   | By MS/MS   | By MS/MS | By MS/MS | By MS/MS   | By MS/MS   | By MS/MS   | By MS/MS   | 25,2 | 115,73 | 0 | 97,94  |
| Q15021               | Q15021        | Condensin complex subunit 1                                                                                                                                                        | NCAPD2        | 11 | 11 | 11 | By MS/MS | By MS/MS | By MS/MS   | By MS/MS   | By MS/MS | By MS/MS   | By MS/MS   | By MS/MS   | By MS/MS | By MS/MS | By MS/MS   | By MS/MS   | By MS/MS   | By MS/MS   | 14,2 | 157,18 | 0 | 83,31  |
| Q09161               | Q09161        | Nuclear cap-binding protein subunit 1                                                                                                                                              | NCBP1         | 12 | 12 | 12 | By MS/MS | By MS/MS | By MS/MS   | By MS/MS   | By MS/MS | By MS/MS   | By MS/MS   | By MS/MS   | By MS/MS | By MS/MS | By MS/MS   | By MS/MS   | By MS/MS   | By MS/MS   | 23,3 | 91,84  | 0 | 15,89  |
| Q69YL0               | Q69YL0        | Uncharacterized protein NCBP2-AS2                                                                                                                                                  | NCBP2-AS2     | 4  | 4  | 4  | By MS/MS | By MS/MS | By MS/MS   | By MS/MS   | By MS/MS | By MS/MS   | By MS/MS   | By MS/MS   | By MS/MS | By MS/MS | By MS/MS   | By MS/MS   | By MS/MS   | By MS/MS   | 60,6 | 10,89  | 0 | 9,13   |
| P19338               | P19338        | Nucleolin                                                                                                                                                                          | NCL           | 32 | 32 | 32 | By MS/MS | By MS/MS | By MS/MS   | By MS/MS   | By MS/MS | By MS/MS   | By MS/MS   | By MS/MS   | By MS/MS | By MS/MS | By MS/MS   | By MS/MS   | By MS/MS   | By MS/MS   | 36,1 | 76,61  | 0 | 323,31 |
| Q969V3               | Q969V3        | Nicalin                                                                                                                                                                            | NCLN          | 5  | 5  | 5  | By MS/MS | By MS/MS | By MS/MS   | By MS/MS   | By MS/MS | By MS/MS   | By MS/MS   | By MS/MS   | By MS/MS | By MS/MS | By MS/MS   | By MS/MS   | By MS/MS   | By MS/MS   | 12,4 | 62,97  | 0 | 11,98  |
| Q92542               | Q92542        | Nicastrin                                                                                                                                                                          | NCS1TN        | 5  | 5  | 5  | By MS/MS | By MS/MS | By MS/MS   | By MS/MS   | By MS/MS | By MS/MS   | By MS/MS   | By MS/MS   | By MS/MS | By MS/MS | By MS/MS   | By MS/MS   | By MS/MS   | By MS/MS   | 8,5  | 78,41  | 0 | 9,65   |
| Q9UI09               | Q9UI09        | NADH dehydrogenase [ubiquinone] 1 alpha subcomplex subunit 12                                                                                                                      | NDUFA12       | 5  | 5  | 5  | By MS/MS | By MS/MS | By MS/MS   | By MS/MS   | By MS/MS | By MS/MS   | By MS/MS   | By MS/MS   | By MS/MS | By MS/MS | By MS/MS   | By MS/MS   | By MS/MS   | By MS/MS   | 40,0 | 17,11  | 0 | 54,14  |
| Q9P0J0               | Q9P0J0        | NADH dehydrogenase [ubiquinone] 1 alpha subcomplex subunit 13                                                                                                                      | NDUFA13       | 6  | 6  | 6  | By MS/MS | By MS/MS | By MS/MS   | By MS/MS   | By MS/MS | By MS/MS   | By MS/MS   | By MS/MS   | By MS/MS | By MS/MS | By MS/MS   | By MS/MS   | By MS/MS   | By MS/MS   | 36,8 | 16,70  | 0 | 13,81  |
| Q43678               | Q43678        | NADH dehydrogenase [ubiquinone] 1 alpha subcomplex subunit 2                                                                                                                       | NDUFA2        | 5  | 5  | 5  | By MS/MS | By MS/MS | By MS/MS   | By MS/MS   | By MS/MS | By MS/MS   | By MS/MS   | By MS/MS   | By MS/MS | By MS/MS | By MS/MS   | By MS/MS   | By MS/MS   | By MS/MS   | 56,6 | 10,92  | 0 | 30,41  |
| Q16718               | Q16718        | NADH dehydrogenase [ubiquinone] 1 alpha subcomplex subunit 5                                                                                                                       | NDUFA5        | 6  | 6  | 6  | By MS/MS | By MS/MS | By MS/MS   | By MS/MS   | By MS/MS | By MS/MS   | By MS/MS   | By MS/MS   | By MS/MS | By MS/MS | By MS/MS   | By MS/MS   | By MS/MS   | By MS/MS   | 70,7 | 13,46  | 0 | 28,51  |
| P51970               | P51970        | NADH dehydrogenase [ubiquinone] 1 alpha subcomplex subunit 8                                                                                                                       | NDUFA8        | 5  | 5  | 5  | By MS/MS | By MS/MS | By MS/MS   | By MS/MS   | By MS/MS | By MS/MS   | By MS/MS   | By MS/MS   | By MS/MS | By MS/MS | By MS/MS   | By MS/MS   | By MS/MS   | By MS/MS   | 35,5 | 20,11  | 0 | 16,96  |
| Q16795               | Q16795        | NADH dehydrogenase [ubiquinone] 1 alpha subcomplex subunit 9, mitochondrial                                                                                                        | NDUFA9        | 12 | 12 | 12 | By MS/MS | By MS/MS | By MS/MS   | By MS/MS   | By MS/MS | By MS/MS   | By MS/MS   | By MS/MS   | By MS/MS | By MS/MS | By MS/MS   | By MS/MS   | By MS/MS   | By MS/MS   | 37,1 | 42,51  | 0 | 323,31 |
| Q8N183               | Q8N183        | Mitofurin, mitochondrial                                                                                                                                                           | NDUFAF2       | 7  | 7  | 7  | By MS/MS | By MS/MS | By MS/MS   | By MS/MS   | By MS/MS | By MS/MS   | By MS/MS   | By MS/MS   | By MS/MS | By MS/MS | By MS/MS   | By MS/MS   | By MS/MS   | By MS/MS   | 40,8 | 19,86  | 0 | 14,71  |
| Q9BU61               | Q9BU61        | NADH dehydrogenase [ubiquinone] 1 alpha subcomplex assembly factor 3                                                                                                               | NDUFAF3       | 4  | 4  | 4  | By MS/MS | By MS/MS | By MS/MS   | By MS/MS   | By MS/MS | By MS/MS   | By MS/MS   | By MS/MS   | By MS/MS | By MS/MS | By MS/MS   | By MS/MS   | By MS/MS   | By MS/MS   | 32,1 | 20,35  | 0 | 21,49  |
| Q96000               | Q96000        | NADH dehydrogenase [ubiquinone] 1 beta subcomplex subunit 10                                                                                                                       | NDUFB10       | 12 | 12 | 12 | By MS/MS | By MS/MS | By MS/MS   | By MS/MS   | By MS/MS | By MS/MS   | By MS/MS   | By MS/MS   | By MS/MS | By MS/MS | By MS/MS   | By MS/MS   | By MS/MS   | By MS/MS   | 54,7 | 20,78  | 0 | 28,24  |
| Q95139               | Q95139        | NADH dehydrogenase [ubiquinone] 1 beta subcomplex subunit 6                                                                                                                        | NDUFB6        | 4  | 4  | 4  | By MS/MS | By MS/MS | By MS/MS   | By MS/MS   | By MS/MS | By MS/MS   | By MS/MS   | By MS/MS   | By MS/MS | By MS/MS | By MS/MS   | By MS/MS   | By MS/MS   | By MS/MS   | 39,8 | 15,49  | 0 | 15,39  |
| Q9V6M9               | Q9V6M9        | NADH dehydrogenase [ubiquinone] 1 beta subcomplex subunit 9                                                                                                                        | NDUFB9        | 6  | 6  | 6  | By MS/MS | By MS/MS | By MS/MS   | By MS/MS   | By MS/MS | By MS/MS   | By MS/MS   | By MS/MS   | By MS/MS | By MS/MS | By MS/MS   | By MS/MS   | By MS/MS   | By MS/MS   | 43,0 | 21,83  | 0 | 285,25 |
| Q95298;E9PC53        | Q95298        | NADH dehydrogenase [ubiquinone] 1 subunit C2                                                                                                                                       | NDUFC2        | 5  | 5  | 5  | By MS/MS | By MS/MS | By MS/MS   | By MS/MS   | By MS/MS | By MS/MS   | By MS/MS   | By MS/MS   | By MS/MS | By MS/MS | By MS/MS   | By MS/MS   | By MS/MS   | By MS/MS   | 31,9 | 14,19  | 0 | 4,20   |
| P28331               | P28331        | NADH-ubiquinone oxidoreductase 75 kDa subunit, mitochondrial                                                                                                                       | NDUFS1        | 15 | 15 | 15 | By MS/MS | By MS/MS | By MS/MS   | By MS/MS   | By MS/MS | By MS/MS   | By MS/MS   | By MS/MS   | By MS/MS | By MS/MS | By MS/MS   | By MS/MS   | By MS/MS   | By MS/MS   | 36,6 | 79,47  | 0 | 164,05 |
| Q75306               | Q75306        | NADH dehydrogenase [ubiquinone] iron-sulfur protein 2, mitochondrial                                                                                                               | NDUFS2        | 8  | 8  | 8  | By MS/MS | By MS/MS | By MS/MS   | By MS/MS   | By MS/MS | By MS/MS   | By MS/MS   | By MS/MS   | By MS/MS | By MS/MS | By MS/MS   | By MS/MS   | By MS/MS   | By MS/MS   | 22,7 | 52,55  | 0 | 43,00  |
| Q75489               | Q75489        | NADH dehydrogenase [ubiquinone] iron-sulfur protein 3, mitochondrial                                                                                                               | NDUFS3        | 12 | 12 | 12 | By MS/MS | By MS/MS | By MS/MS   | By MS/MS   | By MS/MS | By MS/MS   | By MS/MS   | By MS/MS   | By MS/MS | By MS/MS | By MS/MS   | By MS/MS   | By MS/MS   | By MS/MS   | 43,2 | 30,24  | 0 | 44,06  |
| Q43920               | Q43920        | NADH dehydrogenase [ubiquinone] iron-sulfur protein 5                                                                                                                              | NDUFS5        | 4  | 4  | 4  | By MS/MS | By MS/MS | By MS/MS   | By MS/MS   | By MS/MS | By MS/MS   | By MS/MS   | By MS/MS   | By MS/MS | By MS/MS | By MS/MS   | By MS/MS   | By MS/MS   | By MS/MS   | 36,8 | 12,52  | 0 | 12,43  |
| Q00217               | Q00217        | NADH dehydrogenase [ubiquinone] iron-sulfur protein 8, mitochondrial                                                                                                               | NDUFS8        | 4  | 4  | 4  | By MS/MS | By MS/MS | By MS/MS   | By MS/MS   |          |            |            |            |          |          |            |            |            |            |      |        |   |        |

|                       |                       |                                                                                                                   |                    |    |    |    |          |          |          |          |          |          |          |          |          |          |          |          |      |        |   |        |
|-----------------------|-----------------------|-------------------------------------------------------------------------------------------------------------------|--------------------|----|----|----|----------|----------|----------|----------|----------|----------|----------|----------|----------|----------|----------|----------|------|--------|---|--------|
| P19404                | P19404                | NADH dehydrogenase [ubiquinone] flavoprotein 2, mitochondrial                                                     | NDUFV2             | 5  | 5  | 5  | By MS/MS | 33,3 | 27,39  | 0 | 9,79   |
| Q9NV23                | Q9NV23                | Adaptin ear-binding coat-associated protein 2                                                                     | NECAP2             | 5  | 5  | 5  | By MS/MS | 33,8 | 28,34  | 0 | 48,30  |
| Q8WX92                | Q8WX92                | Negative elongation factor 8                                                                                      | NELF8              | 6  | 6  | 6  | By MS/MS | By MS/MS | By MS/MS |          |          | By MS/MS |          |          |          |          | By MS/MS | By MS/MS | 17,2 | 65,70  | 0 | 7,14   |
| Q9Y697                | Q9Y697                | Cysteine desulfurase, mitochondrial                                                                               | NFS1               | 4  | 4  | 4  |          | By MS/MS | By MS/MS |          |          | By MS/MS |          |          |          |          | By MS/MS | By MS/MS | 13,8 | 50,20  | 0 | 23,48  |
| Q9NX24                | Q9NX24                | H/ACA ribonucleoprotein complex subunit 2                                                                         | NHP2               | 4  | 4  | 4  | By MS/MS | 31,4 | 17,20  | 0 | 91,62  |
| P55769                | P55769                | NHP2-like protein 1;NHP2-like protein 1, N-terminally processed                                                   | NHP2L1             | 7  | 7  | 7  | By MS/MS | 45,3 | 14,17  | 0 | 85,94  |
| Q9GZ78                | Q9GZ78                | NIF3-like protein 1                                                                                               | NIF3L1             | 4  | 4  | 4  |          |          |          | By MS/MS |          |          |          |          |          |          | By MS/MS | By MS/MS | 15,9 | 41,97  | 0 | 5,48   |
| Q9UFN0                | Q9UFN0                | Protein NipSnap homolog 3A                                                                                        | NIPSNAP3A          | 5  | 5  | 5  | By MS/MS |          |          | By MS/MS | By MS/MS | By MS/MS | By MS/MS | 28,7 | 28,47  | 0 | 26,02  |
| P15531                | P15531                | Nucleoside diphosphate kinase A                                                                                   | NME1               | 14 | 7  | 7  | By MS/MS | 72,4 | 17,15  | 0 | 139,88 |
| P22392;O60361         | P22392;O60361         | Nucleoside diphosphate kinase B;Putative nucleoside diphosphate kinase                                            | NME2;NME2P1        | 17 | 17 | 10 | By MS/MS | 86,2 | 17,30  | 0 | 323,31 |
| P30419;O60551         | P30419                | Glycylpeptide N-tetradecanoyltransferase 1                                                                        | NMT1               | 9  | 9  | 9  | By MS/MS |          | By MS/MS | By MS/MS | 28,4 | 56,81  | 0 | 85,56  |
| Q13423                | Q13423                | NAD(P) transhydrogenase, mitochondrial                                                                            | NNT                | 13 | 13 | 13 | By MS/MS |          | By MS/MS | By MS/MS | By MS/MS | By MS/MS | 17,5 | 113,89 | 0 | 101,26 |
| Q9Y319                | Q9Y319                | Nucleolar complex protein 2 homolog                                                                               | NOC2L              | 4  | 4  | 4  |          | By MS/MS |          |          |          | By MS/MS | By MS/MS | 8,3  | 84,92  | 0 | 17,38  |
| Q9BV14                | Q9BV14                | Nucleolar complex protein 4 homolog                                                                               | NOC4L              | 4  | 4  | 4  | By MS/MS |          |          |          | By MS/MS | By MS/MS | 15,5 | 58,47  | 0 | 10,73  |
| Q9H6R4                | Q9H6R4                | Nucleolar protein 6                                                                                               | NOL6               | 7  | 7  | 7  | By MS/MS | 9,9  | 127,59 | 0 | 42,20  |
| Q15155;P69849; Q5JPE7 | Q15155;P69849; Q5JPE7 | Nodal modulator 1;Nodal modulator 3;Nodal modulator 2                                                             | NOMO1;NOMO3;NOMO 2 | 16 | 16 | 16 | By MS/MS |          | By MS/MS | By MS/MS | By MS/MS | 21,3 | 134,32 | 0 | 81,06  |
| Q15233                | Q15233                | Non-POU domain-containing octamer-binding protein                                                                 | NONO               | 11 | 10 | 10 |          |          | By MS/MS | 32,9 | 54,23  | 0 | 133,88 |
| P46087                | P46087                | Probable 28S rRNA (cytosine(4447)-C(5))-methyltransferase                                                         | NOP2               | 6  | 6  | 6  | By MS/MS |          |          | By MS/MS | By MS/MS | By MS/MS | 9,4  | 89,30  | 0 | 16,27  |
| O00567                | O00567                | Nucleolar protein 56                                                                                              | NOP56              | 7  | 7  | 7  | By MS/MS | By MS/MS |          |          |          |          |          |          |          |          | By MS/MS | By MS/MS | 20,4 | 66,05  | 0 | 14,80  |
| Q9Y2X3                | Q9Y2X3                | Nucleolar protein 58                                                                                              | NOP58              | 5  | 5  | 5  |          |          | By MS/MS | By MS/MS | By MS/MS | By MS/MS |          |          |          |          | By MS/MS | By MS/MS | 13,0 | 59,58  | 0 | 24,25  |
| Q9Y314                | Q9Y314                | Nitric oxide synthase-interacting protein                                                                         | NOSIP              | 5  | 5  | 5  | By MS/MS | 27,9 | 33,17  | 0 | 82,37  |
| P55786;AGNEC2         | P55786                | Puromycin-sensitive aminopeptidase                                                                                | NPEPP5             | 25 | 25 | 25 | By MS/MS | 33,8 | 103,28 | 0 | 76,30  |
| Q8TAT6                | Q8TAT6                | Nuclear protein localization protein 4 homolog                                                                    | NPLOC4             | 6  | 6  | 6  | By MS/MS | 18,8 | 68,12  | 0 | 251,50 |
| P06748                | P06748                | Nucleophosmin                                                                                                     | NPM1               | 15 | 15 | 15 | By MS/MS | 58,8 | 32,58  | 0 | 323,31 |
| Q75607                | Q75607                | Nucleoplasmin-3                                                                                                   | NPM3               | 5  | 5  | 5  | By MS/MS | 36,5 | 19,34  | 0 | 26,20  |
| P15559                | P15559                | NAD(P)H dehydrogenase [quinone] 1                                                                                 | NQO1               | 6  | 6  | 6  | By MS/MS | 28,1 | 30,87  | 0 | 10,62  |
| P16083                | P16083                | Ribosyl-dihydropyrimidinamide dehydrogenase [quinone]                                                             | NQO2               | 7  | 7  | 7  | By MS/MS | 46,3 | 25,92  | 0 | 104,69 |
| P01111                | P01111                | GTPase NRas                                                                                                       | NRAS               | 5  | 5  | 2  | By MS/MS | 31,2 | 21,23  | 0 | 30,81  |
| Q43847                | Q43847                | Nardilysin                                                                                                        | NRD1               | 21 | 21 | 21 | By MS/MS |          | By MS/MS | By MS/MS | 23,2 | 131,57 | 0 | 304,97 |
| Q15738                | Q15738                | Sterol 4-alpha-carboxylate 3-dehydrogenase, decarboxylating                                                       | NSDHL              | 9  | 9  | 9  | By MS/MS | 41,6 | 41,90  | 0 | 28,46  |
| P46459                | P46459                | Vesicle-fusing ATPase                                                                                             | NSF                | 6  | 6  | 6  | By MS/MS | By MS/MS | By MS/MS | By MS/MS |          |          |          |          |          | By MS/MS | By MS/MS |          | 9,0  | 82,59  | 0 | 13,16  |
| Q9UN22                | Q9UN22                | NSFL1 cofactor p47                                                                                                | NSFL1C             | 9  | 9  | 9  | By MS/MS |          |          | By MS/MS | By MS/MS | By MS/MS | By MS/MS | 32,7 | 40,57  | 0 | 193,52 |
| Q08123                | Q08123                | tRNA (cytosine(34)-C(5))-methyltransferase                                                                        | NSUN2              | 15 | 15 | 15 | By MS/MS | 28,4 | 86,47  | 0 | 141,06 |
| Q8TCD5                | Q8TCD5                | 5(3)-deoxynucleotidase, cytosolic type                                                                            | NTSC               | 5  | 5  | 5  | By MS/MS | By MS/MS |          | By MS/MS | By MS/MS | By MS/MS |          |          | By MS/MS |          |          |          | 43,3 | 23,38  | 0 | 21,95  |
| P49902                | P49902                | Cytosolic purine 5-nucleotidase                                                                                   | NTSC2              | 7  | 7  | 7  | By MS/MS |          |          |          |          | By MS/MS | By MS/MS | 22,5 | 64,97  | 0 | 29,18  |
| Q5TFE4                | Q5TFE4                | 5-nucleotidase domain-containing protein 1                                                                        | NTSDC1             | 5  | 5  | 5  | By MS/MS |          |          |          |          | By MS/MS | By MS/MS | 22,4 | 51,84  | 0 | 14,62  |
| Q9BV86                | Q9BV86                | N-terminal Xaa-Pro-Lys N-methyltransferase 1;N-terminal Xaa-Pro-Lys N-methyltransferase 1, N-terminally processed | NTMT1              | 7  | 7  | 7  | By MS/MS | 46,2 | 25,39  | 0 | 180,92 |
| Q9BSD7                | Q9BSD7                | Cancer-related nucleoside-triphosphatase                                                                          | NTPCR              | 6  | 6  | 6  | By MS/MS | 36,3 | 20,71  | 0 | 45,72  |
| Q9Y266                | Q9Y266                | Nuclear migration protein nudC                                                                                    | NUDC               | 18 | 18 | 18 | By MS/MS | 50,8 | 38,24  | 0 | 80,48  |
| Q96R56                | Q96R56                | NudC domain-containing protein 1                                                                                  | NUDCD1             | 4  | 4  | 4  | By MS/MS | By MS/MS | By MS/MS |          | By MS/MS | By MS/MS |          |          | By MS/MS |          | By MS/MS | By MS/MS | 11,0 | 66,76  | 0 | 11,22  |
| Q8WV12                | Q8WV12                | NudC domain-containing protein 2                                                                                  | NUDCD2             | 7  | 7  | 7  | By MS/MS | 43,9 | 17,68  | 0 | 242,00 |
| Q43809                | Q43809                | Cleavage and polyadenylation specificity factor subunit 5                                                         | NUDT21             | 13 | 13 | 13 | By MS/MS | 51,5 | 26,23  | 0 | 60,39  |
| Q95989                | Q95989                | Diphosphoinositol polyphosphate phosphohydrolase 1                                                                | NUDT3              | 4  | 4  | 4  | By MS/MS | By MS/MS |          | By MS/MS | By MS/MS | By MS/MS |          |          | By MS/MS | By MS/MS |          |          | 35,5 | 19,47  | 0 | 11,90  |
| Q9UKK9                | Q9UKK9                | ADP-sugar pyrophosphatase                                                                                         | NUDT5              | 13 | 13 | 13 | By MS/MS | 56,6 | 24,33  | 0 | 111,31 |
| Q14980                | Q14980                | Nuclear mitotic apparatus protein 1                                                                               | NUMA1              | 19 | 19 | 19 | By MS/MS | 15,8 | 238,26 | 0 | 76,94  |
| P57740                | P57740                | Nuclear pore complex protein Nup107                                                                               | NUP107             | 9  | 9  | 9  | By MS/MS |          |          |          |          |          | 16,2 | 106,37 | 0 | 126,38 |
| Q8WUM0                | Q8WUM0                | Nuclear pore complex protein Nup133                                                                               | NUP133             | 14 | 14 | 14 | By MS/MS |          | By MS/MS | By MS/MS | 17,0 | 128,98 | 0 | 62,85  |
| Q75694                | Q75694                | Nuclear pore complex protein Nup155                                                                               | NUP155             | 23 | 23 | 23 | By MS/MS | 26,7 | 155,20 | 0 | 225,71 |
| Q12769                | Q12769                | Nuclear pore complex protein Nup160                                                                               | NUP160             | 8  | 8  | 8  | By MS/MS | 8,9  | 162,12 | 0 | 26,48  |
| Q5SRE5                | Q5SRE5                | Nucleoporin NUP188 homolog                                                                                        | NUP188             | 11 | 11 | 11 | By MS/MS |          |          | By MS/MS |          |          | 9,3  | 196,04 | 0 | 34,03  |
| Q92621                | Q92621                | Nuclear pore complex protein Nup205                                                                               | NUP205             | 34 | 34 | 34 | By MS/MS | 24,8 | 227,92 | 0 | 323,31 |
| Q8TEM1                | Q8TEM1                | Nuclear pore membrane glycoprotein 210                                                                            | NUP210             | 23 | 23 | 23 | By MS/MS | 19,3 | 205,11 | 0 | 101,26 |
| P35658                | P35658                | Nuclear pore complex protein Nup214                                                                               | NUP214             | 32 | 32 | 32 | By MS/MS | 28,3 | 213,62 | 0 | 191,98 |
| Q8NFH4                | Q8NFH4                | Nucleoporin Nup37                                                                                                 | NUP37              | 4  | 4  | 4  | By MS/MS |          |          | By MS/MS |          |          | 19,9 | 36,71  | 0 | 16,18  |
| Q8NFH3                | Q8NFH3                | Nucleoporin Nup43                                                                                                 | NUP43              | 7  | 7  | 7  | By MS/MS |          | By MS/MS |          | By MS/MS | 34,5 | 42,15  | 0 | 108,07 |
| Q723B4                | Q723B4                | Nucleoporin p54                                                                                                   | NUP54              | 5  | 5  | 5  |          |          | By MS/MS |          |          |          | By MS/MS | By MS/MS | 14,8 | 55,44  | 0 | 62,63  |
| P37198                | P37198                | Nuclear pore glycoprotein p62                                                                                     | NUP62              | 5  | 5  | 5  | By MS/MS | 16,7 | 53,25  | 0 | 22,21  |
| Q9BW27                | Q9BW27                | Nuclear pore complex protein Nup85                                                                                | NUP85              | 4  | 4  | 4  | By MS/MS | By MS/MS |          |          |          | By MS/MS |          |          |          |          | By MS/MS | By MS/MS | 10,8 | 75,02  | 0 | 20,99  |
| Q8N1F7                | Q8N1F7                | Nuclear pore complex protein Nup93                                                                                | NUP93              | 19 | 19 | 19 | By MS/MS | 37,5 | 93,49  | 0 | 147,25 |
| P52948                | P52948                | Nuclear pore complex protein Nup98-Nup96;Nuclear pore complex protein Nup98;Nuclear pore complex protein Nup96    | NUP98              | 10 | 10 | 10 | By MS/MS | By MS/MS | By MS/MS |          | By MS/MS | 8,1  | 197,58 | 0 | 57,76  |
| P61970                | P61970                | Nuclear transport factor 2                                                                                        | NUTF2              | 7  | 7  | 7  | By MS/MS | By MS/MS |          |          |          |          |          |          |          |          |          |          |      |        |   |        |

|                                  |               |                                                                                                                                |               |    |  |    |  |    |          |          |          |          |          |          |          |            |            |            |            |          |            |          |          |        |       |        |        |
|----------------------------------|---------------|--------------------------------------------------------------------------------------------------------------------------------|---------------|----|--|----|--|----|----------|----------|----------|----------|----------|----------|----------|------------|------------|------------|------------|----------|------------|----------|----------|--------|-------|--------|--------|
| O15294                           | O15294        | UDP-N-acetylglucosamine-peptide N-acetylglucosaminyltransferase 110 kDa subunit                                                | OGT           | 4  |  | 4  |  | 4  | By MS/MS |            | By MS/MS   | By MS/MS   | By MS/MS   | By MS/MS | By MS/MS   | By MS/MS | 7,0      | 116,92 | 0     | 24,14  |        |
| Q9NTK5                           | Q9NTK5        | Obg-like ATPase 1                                                                                                              | OLA1          | 24 |  | 24 |  | 24 | By MS/MS   | By MS/MS   | By MS/MS   | By MS/MS   | By MS/MS | By MS/MS   | By MS/MS | 71,5     | 44,74  | 0     | 132,90 |        |
| O60313                           | O60313        | Dynamin-like 120 kDa protein, mitochondrial;Dynamin-like 120 kDa protein, form S1                                              | OPA1          | 7  |  | 7  |  | 7  | By MS/MS |            | By MS/MS   |            |            |          |            |          | 12,3     | 111,63 | 0     | 41,59  |        |
| Q9NPF4                           | Q9NPF4        | Probable tRNA N6-adenosine threonylcarbamoyltransferase                                                                        | OSGEP         | 4  |  | 4  |  | 4  | By MS/MS   | By MS/MS   | By MS/MS   | By MS/MS   | By MS/MS | By MS/MS   | By MS/MS | 23,6     | 36,43  | 0     | 34,77  |        |
| Q92882                           | Q92882        | Osteoclast-stimulating factor 1                                                                                                | OSTF1         | 5  |  | 5  |  | 5  | By MS/MS |            | By MS/MS   | By MS/MS   | By MS/MS   | By MS/MS | By MS/MS   | By MS/MS | 27,1     | 23,79  | 0     | 28,51  |        |
| Q96FW1                           | Q96FW1        | Ubiquitin thioesterase OTU81                                                                                                   | OTU81         | 8  |  | 8  |  | 8  | By MS/MS   | By MS/MS   | By MS/MS   | By MS/MS   | By MS/MS | By MS/MS   | By MS/MS | 40,6     | 31,28  | 0     | 115,95 |        |
| Q8N6M0                           | Q8N6M0        | OTU domain-containing protein 6B                                                                                               | OTUD6B        | 5  |  | 5  |  | 5  | By MS/MS   | By MS/MS   | By MS/MS   | By MS/MS   | By MS/MS | By MS/MS   | By MS/MS | 24,9     | 33,81  | 0     | 31,29  |        |
| P55809                           | P55809        | Succinyl-CoA:3-ketoadic coenzyme A transferase 1, mitochondrial                                                                | OXC1T         | 4  |  | 4  |  | 4  | By MS/MS   | By MS/MS   | By MS/MS   | By MS/MS   | By MS/MS | By MS/MS   | By MS/MS | 16,9     | 56,16  | 0     | 323,31 |        |
| Q95747                           | Q95747        | Serine/threonine-protein kinase OSR1                                                                                           | OXSRI         | 8  |  | 8  |  | 8  | By MS/MS |            | By MS/MS   | By MS/MS   |            |          | By MS/MS   | By MS/MS | 21,6     | 58,02  | 0     | 34,09  |        |
| P07237                           | P07237        | Protein disulfide-isomerase                                                                                                    | P4HB          | 31 |  | 31 |  | 31 | By MS/MS   | By MS/MS   | By MS/MS   | By MS/MS   | By MS/MS | By MS/MS   | By MS/MS | 61,6     | 57,12  | 0     | 323,31 |        |
| Q9U080                           | Q9U080        | Proliferation-associated protein 2G4                                                                                           | PA2G4         | 26 |  | 26 |  | 26 | By MS/MS   | By MS/MS   | By MS/MS   | By MS/MS   | By MS/MS | By MS/MS   | By MS/MS | 69,0     | 43,79  | 0     | 323,31 |        |
| P11940;Q9H361;Q4VU2;Q5QF8;Q96DU9 | P11940;Q9H361 | Polyadenylate-binding protein 1;Polyadenylate-binding protein 3                                                                | PABPC1;PABPC3 | 26 |  | 26 |  | 17 | By MS/MS   | By MS/MS   | By MS/MS   | By MS/MS   | By MS/MS | By MS/MS   | By MS/MS | 42,3     | 70,67  | 0     | 323,31 |        |
| Q13310                           | Q13310        | Polyadenylate-binding protein 4                                                                                                | PABPC4        | 16 |  | 7  |  | 7  | By MS/MS | By matchin | By matchin | By matchin | By matchin | By MS/MS | By matchin |          | 29,7     | 70,78  | 0     | 8,16   |        |
| Q86U42;A6NDY0                    | Q86U42        | Polyadenylate-binding protein 2                                                                                                | PABPN1        | 4  |  | 4  |  | 4  | By MS/MS   | By MS/MS   | By MS/MS   | By MS/MS   | By MS/MS | By MS/MS   | By MS/MS | 27,8     | 32,75  | 0     | 23,72  |        |
| P68402                           | P68402        | Platelet-activating factor acetylhydrolase IB subunit beta                                                                     | PAFAH1B2      | 4  |  | 4  |  | 4  | By MS/MS   | By MS/MS   | By MS/MS   | By MS/MS   | By MS/MS | By MS/MS   |          | 30,6     | 25,57  | 0     | 97,81  |        |
| Q15102                           | Q15102        | Platelet-activating factor acetylhydrolase IB subunit gamma                                                                    | PAFAH1B3      | 8  |  | 8  |  | 8  | By MS/MS   | By MS/MS   | By MS/MS   | By MS/MS   | By MS/MS | By MS/MS   | By MS/MS | 46,3     | 25,73  | 0     | 93,37  |        |
| P22234                           | P22234        | Multifunctional protein ADE2;Phosphoribosylaminoimidazole-succinocarboxamide synthase;Phosphoribosylaminoimidazole carboxylase | PAIC5         | 31 |  | 31 |  | 31 | By MS/MS   | By MS/MS   | By MS/MS   | By MS/MS   | By MS/MS | By MS/MS   | By MS/MS | 81,2     | 47,08  | 0     | 323,31 |        |
| Q13177;Q75914;Q13153             | Q13177        | Serine/threonine-protein kinase PAK 2;PAK-2p27;PAK-2p34                                                                        | PAK2          | 17 |  | 17 |  | 17 | By MS/MS   | By MS/MS   | By MS/MS   | By MS/MS   | By MS/MS | By MS/MS   | By MS/MS | 51,0     | 58,04  | 0     | 280,54 |        |
| Q9Y3D7                           | Q9Y3D7        | Mitochondrial import inner membrane translocase subunit TIM16                                                                  | PAM16         | 4  |  | 4  |  | 4  | By MS/MS   | By MS/MS   |            | By MS/MS   | By MS/MS | By MS/MS   | By MS/MS | 51,2     | 13,83  | 0     | 163,28 |        |
| Q99497                           | Q99497        | Protein deglycase DJ-1                                                                                                         | PARK7         | 18 |  | 18 |  | 18 | By MS/MS   | By MS/MS   | By MS/MS   | By MS/MS   | By MS/MS | By MS/MS   | By MS/MS | 81,5     | 19,89  | 0     | 263,91 |        |
| P09874                           | P09874        | Poly [ADP-ribose] polymerase 1                                                                                                 | PARP1         | 31 |  | 31 |  | 31 | By MS/MS   | By MS/MS   | By MS/MS   | By MS/MS   | By MS/MS | By MS/MS   | By MS/MS | 41,5     | 113,08 | 0     | 260,06 |        |
| P61457                           | P61457        | Pterin-4-alpha-carbinolamine dehydratase                                                                                       | PCBD01        | 5  |  | 5  |  | 5  | By MS/MS | By MS/MS |          |          | By MS/MS |          | By MS/MS | By MS/MS   | By MS/MS   | By MS/MS   | By MS/MS   | By MS/MS | By MS/MS   | 57,7     | 12,00    | 0      | 38,33 |        |        |
| Q15365                           | Q15365        | Poly(rC)-binding protein 1                                                                                                     | PCBP1         | 14 |  | 14 |  | 12 | By MS/MS   | By MS/MS   | By MS/MS   | By MS/MS   | By MS/MS | By MS/MS   | By MS/MS | 80,1     | 37,50  | 0     | 323,31 |        |
| Q15366                           | Q15366        | Poly(rC)-binding protein 2                                                                                                     | PCBP2         | 14 |  | 12 |  | 11 | By MS/MS   | By MS/MS   | By MS/MS   | By MS/MS   | By MS/MS | By MS/MS   | By MS/MS | 61,9     | 38,58  | 0     | 120,15 |        |
| Q16822                           | Q16822        | Phosphoenolpyruvate carboxykinase [GTP], mitochondrial                                                                         | PKC2          | 5  |  | 5  |  | 5  | By MS/MS   | By MS/MS   |            | By MS/MS   |          |            | By MS/MS | 9,8      | 70,73  | 0     | 11,81  |        |
| P22061                           | P22061        | Protein-L-isopartate(D-aspartate) O-methyltransferase                                                                          | PCMT1         | 14 |  | 14 |  | 14 | By MS/MS   | By MS/MS   | By MS/MS   | By MS/MS   | By MS/MS | By MS/MS   | By MS/MS | 70,5     | 24,64  | 0     | 265,63 |        |
| P12004                           | P12004        | Proliferating cell nuclear antigen                                                                                             | PCNA          | 14 |  | 14 |  | 14 | By MS/MS   | By MS/MS   | By MS/MS   | By MS/MS   | By MS/MS | By MS/MS   | By MS/MS | 74,7     | 28,77  | 0     | 323,31 |        |
| Q99447                           | Q99447        | Ethanolamine-phosphate cytidylyltransferase                                                                                    | PCYT2         | 5  |  | 5  |  | 5  | By MS/MS   | By MS/MS   | By MS/MS   | By MS/MS   | By MS/MS | By MS/MS   | By MS/MS | 20,3     | 43,84  | 0     | 14,99  |        |
| Q13442                           | Q13442        | 28 kDa heat- and acid-stable phosphoprotein                                                                                    | PDAP1         | 5  |  | 5  |  | 5  | By MS/MS   |            | By MS/MS   | By MS/MS   | By MS/MS | By MS/MS   | By MS/MS | 32,0     | 20,63  | 0     | 174,24 |        |
| Q9BUL8                           | Q9BUL8        | Programmed cell death protein 10                                                                                               | PDCD10        | 5  |  | 5  |  | 5  | By MS/MS |            | By MS/MS   | By MS/MS   | By MS/MS   | By MS/MS | By MS/MS   | By MS/MS | 26,4     | 24,70  | 0     | 7,20   |        |
| Q14690                           | Q14690        | Protein RRP5 homolog                                                                                                           | PDCD11        | 7  |  | 7  |  | 7  | By MS/MS   | By MS/MS   | By MS/MS   | By MS/MS   | By MS/MS | By MS/MS   | By MS/MS | 6,6      | 208,70 | 0     | 39,88  |        |
| Q14737                           | Q14737        | Programmed cell death protein 5                                                                                                | PDCD5         | 7  |  | 7  |  | 7  | By MS/MS   | By MS/MS   | By MS/MS   | By MS/MS   | By MS/MS | By MS/MS   | By MS/MS | 51,2     | 14,29  | 0     | 105,52 |        |
| Q75340                           | Q75340        | Programmed cell death protein 6                                                                                                | PDCD6         | 9  |  | 9  |  | 9  | By MS/MS   | By MS/MS   | By MS/MS   | By MS/MS   | By MS/MS | By MS/MS   | By MS/MS | 63,4     | 21,87  | 0     | 54,40  |        |
| Q8WUM4                           | Q8WUM4        | Programmed cell death 6-interacting protein                                                                                    | PDCD6IP       | 40 |  | 40 |  | 40 | By MS/MS   | By MS/MS   | By MS/MS   | By MS/MS   | By MS/MS | By MS/MS   | By MS/MS | 65,6     | 96,02  | 0     | 323,31 |        |
| Q9H214                           | Q9H214        | Phosducin-like protein 3                                                                                                       | PDC13         | 6  |  | 6  |  | 6  | By MS/MS |          |            | By MS/MS   | By MS/MS   | By MS/MS   | By MS/MS | By MS/MS   | By MS/MS | 36,0     | 27,61  | 0     | 10,04  |        |
| Q8NB37                           | Q8NB37        | Parkinson disease 7 domain-containing protein 1                                                                                | PDCD1         | 4  |  | 4  |  | 4  | By MS/MS |            | By MS/MS   | By MS/MS   | By MS/MS   | By MS/MS | By MS/MS   | By MS/MS | 32,7     | 23,30  | 0     | 45,19  |        |
| P08559;P29803                    | P08559        | Pyruvate dehydrogenase E1 component subunit alpha, somatic form, mitochondrial                                                 | PDHA1         | 5  |  | 5  |  | 5  | By MS/MS   | By MS/MS   | By MS/MS   | By MS/MS   | By MS/MS | By MS/MS   | By MS/MS | 16,9     | 43,30  | 0     | 12,77  |        |
| P11177                           | P11177        | Pyruvate dehydrogenase E1 component subunit beta, mitochondrial                                                                | PDHB          | 12 |  | 12 |  | 12 | By MS/MS |            | By MS/MS   | By MS/MS   | By MS/MS   | By MS/MS | By MS/MS   | By MS/MS | 47,6     | 39,23  | 0     | 139,85 |        |
| P30101                           | P30101        | Protein disulfide-isomerase A3                                                                                                 | PDIA3         | 29 |  | 29 |  | 29 | By MS/MS   | By MS/MS   |            | By MS/MS   |          |            | By MS/MS | By MS/MS | 63,0   | 56,78 | 0      | 189,58 |
| P13667                           | P13667        | Protein disulfide-isomerase A4                                                                                                 | PDIA4         | 31 |  | 31 |  | 31 | By MS/MS   | By MS/MS   | By MS/MS   | By MS/MS   | By MS/MS | By MS/MS   | By MS/MS | 49,9     | 72,93  | 0     | 323,31 |        |
| Q15084                           | Q15084        | Protein disulfide-isomerase A6                                                                                                 | PDIA6         | 17 |  | 17 |  | 17 | By MS/MS   | By MS/MS   | By MS/MS   | By MS/MS   | By MS/MS | By MS/MS   | By MS/MS | 49,5     | 48,12  | 0     | 267,19 |        |
| O00151                           | O00151        | PD2 and LIM domain protein 1                                                                                                   | PDLM1         | 11 |  | 11 |  | 11 | By MS/MS   | By MS/MS   | By MS/MS   | By MS/MS   | By MS/MS | By MS/MS   | By MS/MS | 60,5     | 36,07  | 0     | 67,38  |        |
| Q96HC4                           | Q96HC4        | PD2 and LIM domain protein 5                                                                                                   | PDLM5         | 6  |  | 6  |  | 6  | By MS/MS   | By MS/MS   | By MS/MS   | By MS/MS   | By MS/MS | By MS/MS   | By MS/MS | 14,8     | 63,94  | 0     | 9,79   |        |
| O00764                           | O00764        | Pyridoxal kinase                                                                                                               | PDXK          | 9  |  | 9  |  | 9  | By MS/MS   | By MS/MS   | By MS/MS   | By MS/MS   | By MS/MS | By MS/MS   | By MS/MS | 29,2     | 35,10  | 0     | 96,75  |        |
| P30086                           | P30086        | Phosphatidylethanolamine-binding protein 1;Hippocampal cholinergic neurostimulating peptide                                    | PEBP1         | 17 |  | 17 |  | 17 | By MS/MS   | By MS/MS   | By MS/MS   | By MS/MS   | By MS/MS | By MS/MS   | By MS/MS | 85,6     | 21,06  | 0     | 323,31 |        |
| Q8IZL8                           | Q8IZL8        | Proline-, glutamic acid- and leucine-rich protein 1                                                                            | PELP1         | 8  |  | 8  |  | 8  | By MS/MS   | By MS/MS   | By MS/MS   | By MS/MS   | By MS/MS | By MS/MS   | By MS/MS | 11,1     | 119,70 | 0     | 19,79  |        |
| O15067                           | O15067        | Phosphoribosylformylglycinamidine synthase                                                                                     | PFAS          | 33 |  | 33 |  | 33 | By MS/MS   | By MS/MS   | By MS/MS   | By MS/MS   | By MS/MS | By MS/MS   | By MS/MS | 35,5     | 144,73 | 0     | 284,88 |        |
| Q9UHV9                           | Q9UHV9        | Prefoldin subunit 2                                                                                                            | PFDN2         | 5  |  | 5  |  | 5  | By MS/MS   | By MS/MS   | By MS/MS   | By MS/MS   | By MS/MS | By MS/MS   | By MS/MS | 32,5     | 16,65  | 0     | 301,93 |        |
| Q9NQP4                           | Q9NQP4        | Prefoldin subunit 4                                                                                                            | PFDN4         | 5  |  | 5  |  | 5  | By MS/MS   | By MS/MS   | By MS/MS   | By MS/MS   | By MS/MS | By MS/MS   | By MS/MS | 38,1     | 15,31  | 0     | 94,29  |        |
| Q99471                           | Q99471        | Prefoldin subunit 5                                                                                                            | PFDN5         | 9  |  | 9  |  | 9  | By MS/MS   | By MS/MS   | By MS/MS   | By MS/MS   | By MS/MS | By MS/MS   | By MS/MS | 68,2     | 17,33  | 0     | 323,31 |        |
| O15212                           | O15212        | Prefoldin subunit 6                                                                                                            | PFDN6         | 9  |  | 9  |  | 9  | By MS/MS   | By MS/MS   | By MS/MS   | By MS/MS   | By MS/MS | By MS/MS   | By MS/MS | 58,1     | 14,58  | 0     | 53,38  |        |
| P17858;P08237                    | P17858        | ATP-dependent 6-phosphofructokinase, liver type                                                                                | PFKL          | 13 |  | 12 |  | 12 | By MS/MS   | By MS/MS   | By MS/MS   | By MS/MS   | By MS/MS | By MS/MS   | By MS/MS | 27,4     | 85,02  | 0     | 33,40  |        |
| Q01813                           | Q01813        |                                                                                                                                |               |    |  |    |  |    |          |          |          |          |          |          |          |            |            |            |            |          |            |          |          |        |       |        |        |





[illegible]

[illegible]

|                      |               |                                                                                                                                                    |  |               |    |    |    |          |          |          |          |          |          |          |          |          |          |          |          |          |      |        |   |        |
|----------------------|---------------|----------------------------------------------------------------------------------------------------------------------------------------------------|--|---------------|----|----|----|----------|----------|----------|----------|----------|----------|----------|----------|----------|----------|----------|----------|----------|------|--------|---|--------|
| P49756               | P49756        | RNA-binding protein 25                                                                                                                             |  | RBM25         | 6  | 6  | 6  | By MS/MS | 9,6  | 100,18 | 0 | 9,96   |
| Q9P2N5;Q5T8P6        | Q9P2N5        | RNA-binding protein 27                                                                                                                             |  | RBM27         | 7  | 7  | 7  | By MS/MS | 10,8 | 118,72 | 0 | 37,46  |
| Q9NW13               | Q9NW13        | RNA-binding protein 28                                                                                                                             |  | RBM28         | 5  | 5  | 5  | By MS/MS |          | 7,9  | 85,74  | 0 | 23,71  |
| Q14498               | Q14498        | RNA-binding protein 39                                                                                                                             |  | RBM39         | 7  | 7  | 7  | By MS/MS | 18,7 | 59,38  | 0 | 184,86 |
| Q9BWf3;Q9BQ04        | Q9BWf3        | RNA-binding protein 4                                                                                                                              |  | RBM4          | 5  | 5  | 5  | By MS/MS | 26,4 | 40,31  | 0 | 248,83 |
| Q9Y559               | Q9Y559        | RNA-binding protein 8A                                                                                                                             |  | RBM8A         | 6  | 6  | 6  | By MS/MS | 41,4 | 19,89  | 0 | 88,23  |
| P38159;Q96E39;O75526 | P38159;Q96E39 | RNA-binding motif protein, X chromosome;RNA-binding motif protein, X chromosome, N-terminally processed;RNA binding motif protein, X-linked-like-1 |  | RBMX;RBMXL1   | 7  | 7  | 6  | By MS/MS |          | 24,0 | 42,33  | 0 | 36,08  |
| P18754               | P18754        | Regulator of chromosome condensation                                                                                                               |  | RCC1          | 5  | 5  | 5  | By MS/MS | 18,5 | 44,97  | 0 | 251,74 |
| Q9P258               | Q9P258        | Protein RCC2                                                                                                                                       |  | RCC2          | 17 | 17 | 17 | By MS/MS | 41,4 | 56,08  | 0 | 174,33 |
| Q8TC12               | Q8TC12        | Retinol dehydrogenase 11                                                                                                                           |  | RDH11         | 6  | 6  | 6  | By MS/MS | 24,8 | 35,39  | 0 | 45,89  |
| Q8NBN7               | Q8NBN7        | Retinol dehydrogenase 13                                                                                                                           |  | RDH13         | 8  | 8  | 8  | By MS/MS | 35,6 | 35,93  | 0 | 166,74 |
| P35241               | P35241        | Radixin                                                                                                                                            |  | RDX           | 19 | 9  | 9  | By MS/MS | 41,5 | 68,56  | 0 | 33,00  |
| Q04206               | Q04206        | Transcription factor p65                                                                                                                           |  | RELA          | 5  | 5  | 5  | By MS/MS | 13,1 | 60,22  | 0 | 5,42   |
| Q9Y388               | Q9Y388        | Oligoribonuclease, mitochondrial                                                                                                                   |  | REXO2         | 7  | 7  | 7  | By MS/MS | 38,0 | 26,83  | 0 | 60,84  |
| P35250               | P35250        | Replication factor C subunit 2                                                                                                                     |  | RFC2          | 4  | 4  | 4  | By MS/MS |          | 18,4 | 39,16  | 0 | 46,89  |
| P40938               | P40938        | Replication factor C subunit 3                                                                                                                     |  | RFC3          | 4  | 4  | 4  | By MS/MS | 18,5 | 40,56  | 0 | 84,96  |
| P35249               | P35249        | Replication factor C subunit 4                                                                                                                     |  | RFC4          | 5  | 5  | 5  | By MS/MS | 23,1 | 39,68  | 0 | 20,36  |
| P40937               | P40937        | Replication factor C subunit 5                                                                                                                     |  | RFC5          | 13 | 13 | 13 | By MS/MS | 54,7 | 38,50  | 0 | 94,96  |
| Q15382               | Q15382        | GTP-binding protein Rheb                                                                                                                           |  | RHEB          | 4  | 4  | 4  | By MS/MS | 20,7 | 20,50  | 0 | 16,84  |
| P61586               | P61586        | Transforming protein RhoA                                                                                                                          |  | RHOA          | 11 | 11 | 4  | By MS/MS | 58,5 | 21,77  | 0 | 323,31 |
| P08134;P62745        | P08134        | Rho-related GTP-binding protein RhoC                                                                                                               |  | RHOC          | 9  | 2  | 2  | By MS/MS | 50,3 | 22,01  | 0 | 9,20   |
| P84095               | P84095        | Rho-related GTP-binding protein RhoG                                                                                                               |  | RHOG          | 12 | 12 | 11 | By MS/MS | 59,2 | 21,31  | 0 | 254,71 |
| Q96D85               | Q96D85        | Regulator of microtubule dynamics protein 1                                                                                                        |  | RMDN1         | 4  | 4  | 4  | By MS/MS | 12,1 | 35,81  | 0 | 4,51   |
| Q8TDP1               | Q8TDP1        | Ribonuclease H2 subunit C                                                                                                                          |  | RNAseH2C      | 4  | 4  | 4  | By MS/MS | 36,6 | 17,84  | 0 | 6,58   |
| Q5VTR2               | Q5VTR2        | E3 ubiquitin-protein ligase BRE1A                                                                                                                  |  | RNF20         | 7  | 7  | 6  | By MS/MS | 10,5 | 113,66 | 0 | 12,79  |
| O75150               | O75150        | E3 ubiquitin-protein ligase BRE1B                                                                                                                  |  | RNF40         | 7  | 6  | 6  | By MS/MS | 11,9 | 113,65 | 0 | 4,15   |
| P13489               | P13489        | Ribonuclease inhibitor                                                                                                                             |  | RNH1          | 18 | 18 | 18 | By MS/MS | 61,8 | 49,97  | 0 | 205,76 |
| Q9H4A4               | Q9H4A4        | Aminopeptidase 8                                                                                                                                   |  | RNPEP         | 23 | 23 | 23 | By MS/MS | 50,3 | 72,60  | 0 | 111,46 |
| P27694               | P27694        | Replication protein A 70 kDa DNA-binding subunit;Replication protein A 70 kDa DNA-binding subunit, N-terminally processed                          |  | RPA1          | 10 | 10 | 10 | By MS/MS | 29,7 | 68,14  | 0 | 158,03 |
| P15927               | P15927        | Replication protein A 32 kDa subunit                                                                                                               |  | RPA2          | 9  | 9  | 9  | By MS/MS | 69,6 | 29,25  | 0 | 223,88 |
| P35244               | P35244        | Replication protein A 14 kDa subunit                                                                                                               |  | RPA3          | 6  | 6  | 6  | By MS/MS | 80,2 | 13,57  | 0 | 41,31  |
| P49247               | P49247        | Ribose-5-phosphate isomerase                                                                                                                       |  | RPIA          | 8  | 8  | 8  | By MS/MS | 34,4 | 33,27  | 0 | 27,15  |
| P27635;Q96L21        | P27635        | 60S ribosomal protein L10                                                                                                                          |  | RPL10         | 13 | 13 | 13 | By MS/MS | 46,7 | 24,60  | 0 | 323,31 |
| P62906               | P62906        | 60S ribosomal protein L10a                                                                                                                         |  | RPL10A        | 12 | 12 | 12 | By MS/MS | 42,4 | 24,83  | 0 | 98,98  |
| P62913               | P62913        | 60S ribosomal protein L11                                                                                                                          |  | RPL11         | 14 | 14 | 14 | By MS/MS | 72,5 | 20,25  | 0 | 314,21 |
| P30050               | P30050        | 60S ribosomal protein L12                                                                                                                          |  | RPL12         | 10 | 10 | 10 | By MS/MS | 70,9 | 17,82  | 0 | 323,31 |
| P26373               | P26373        | 60S ribosomal protein L13                                                                                                                          |  | RPL13         | 12 | 12 | 12 | By MS/MS | 47,9 | 24,26  | 0 | 96,44  |
| P40429;Q6NVV1        | P40429        | 60S ribosomal protein L13a                                                                                                                         |  | RPL13A        | 14 | 14 | 14 | By MS/MS | 49,8 | 23,58  | 0 | 56,81  |
| P50914               | P50914        | 60S ribosomal protein L14                                                                                                                          |  | RPL14         | 7  | 7  | 7  | By MS/MS | 28,4 | 23,43  | 0 | 100,17 |
| P61313               | P61313        | 60S ribosomal protein L15                                                                                                                          |  | RPL15         | 9  | 9  | 9  | By MS/MS | 39,7 | 24,15  | 0 | 139,27 |
| P18621               | P18621        | 60S ribosomal protein L17                                                                                                                          |  | RPL17         | 13 | 13 | 13 | By MS/MS | 50,5 | 21,40  | 0 | 60,60  |
| Q07020               | Q07020        | 60S ribosomal protein L18                                                                                                                          |  | RPL18         | 9  | 9  | 9  | By MS/MS | 35,1 | 21,63  | 0 | 323,31 |
| Q02543               | Q02543        | 60S ribosomal protein L18a                                                                                                                         |  | RPL18A        | 19 | 19 | 19 | By MS/MS | 61,9 | 20,76  | 0 | 228,76 |
| P84098               | P84098        | 60S ribosomal protein L19                                                                                                                          |  | RPL19         | 13 | 13 | 13 | By MS/MS | 42,9 | 23,47  | 0 | 323,31 |
| P46778               | P46778        | 60S ribosomal protein L21                                                                                                                          |  | RPL21         | 11 | 11 | 11 | By MS/MS | 48,1 | 18,57  | 0 | 127,35 |
| P35268               | P35268        | 60S ribosomal protein L22                                                                                                                          |  | RPL22         | 7  | 7  | 6  | By MS/MS | 39,1 | 14,79  | 0 | 323,31 |
| P62829               | P62829        | 60S ribosomal protein L23                                                                                                                          |  | RPL23         | 10 | 10 | 10 | By MS/MS | 61,4 | 14,87  | 0 | 157,81 |
| P62750               | P62750        | 60S ribosomal protein L23a                                                                                                                         |  | RPL23A        | 14 | 14 | 14 | By MS/MS | 47,4 | 17,70  | 0 | 38,14  |
| P83731               | P83731        | 60S ribosomal protein L24                                                                                                                          |  | RPL24         | 10 | 10 | 10 | By MS/MS | 45,2 | 17,78  | 0 | 138,87 |
| P61254;Q9UNX3        | P61254;Q9UNX3 | 60S ribosomal protein L26;60S ribosomal protein L26-like 1                                                                                         |  | RPL26;RPL26L1 | 11 | 11 | 11 | By MS/MS | 44,8 | 17,26  | 0 | 24,09  |
| P61353               | P61353        | 60S ribosomal protein L27                                                                                                                          |  | RPL27         | 11 | 11 | 11 | By MS/MS | 54,4 | 15,80  | 0 | 25,81  |
| P46776               | P46776        | 60S ribosomal protein L27a                                                                                                                         |  | RPL27A        | 9  | 9  | 9  | By MS/MS | 45,3 | 16,56  | 0 | 220,36 |
| P46779               | P46779        | 60S ribosomal protein L28                                                                                                                          |  | RPL28         | 8  | 8  | 8  | By MS/MS | 40,9 | 15,75  | 0 | 46,81  |
| P47914               | P47914        | 60S ribosomal protein L29                                                                                                                          |  | RPL29         | 4  | 4  | 4  | By MS/MS | 20,8 | 17,75  | 0 | 20,18  |
| P39023;Q92901        | P39023        | 60S ribosomal protein L3                                                                                                                           |  | RPL3          | 13 | 13 | 13 | By MS/MS | 36,0 | 46,11  | 0 | 120,79 |
| P62888               |               |                                                                                                                                                    |  |               |    |    |    |          |          |          |          |          |          |          |          |          |          |          |          |          |      |        |   |        |

|                             |                             |                                                                                                                                                                                                       |                    |    |    |    |  |    |          |          |          |          |          |          |          |          |          |          |          |          |          |          |          |          |          |          |          |          |          |          |      |       |   |        |
|-----------------------------|-----------------------------|-------------------------------------------------------------------------------------------------------------------------------------------------------------------------------------------------------|--------------------|----|----|----|--|----|----------|----------|----------|----------|----------|----------|----------|----------|----------|----------|----------|----------|----------|----------|----------|----------|----------|----------|----------|----------|----------|----------|------|-------|---|--------|
| P62917                      | P62917                      | 60S ribosomal protein L8                                                                                                                                                                              | RPL8               | 11 |    | 11 |  | 11 | By MS/MS | 42.4 | 28.02 | 0 | 155.46 |
| P32969                      | P32969                      | 60S ribosomal protein L9                                                                                                                                                                              | RPL9               |    | 15 | 15 |  | 15 | By MS/MS | 72.4 | 21.86 | 0 | 323.31 |
| P05388;Q8NHWS               | P05388;Q8NHWS               | 60S acidic ribosomal protein P0;60S acidic ribosomal protein P0-like                                                                                                                                  | RPLP0;RPLP0P6      | 16 |    | 16 |  | 16 | By MS/MS | 64.0 | 34.27 | 0 | 323.31 |
| P05386                      | P05386                      | 60S acidic ribosomal protein P1                                                                                                                                                                       | RPLP1              | 6  |    | 5  |  | 5  | By MS/MS | 95.6 | 11.51 | 0 | 115.18 |
| P05387                      | P05387                      | 60S acidic ribosomal protein P2                                                                                                                                                                       | RPLP2              | 11 |    | 11 |  | 11 | By MS/MS | 97.4 | 11.67 | 0 | 323.31 |
| P04843                      | P04843                      | Dolichyl-diphosphooligosaccharide--protein glycosyltransferase subunit 1                                                                                                                              | RPN1               | 26 |    | 26 |  | 26 | By MS/MS | 59.5 | 68.57 | 0 | 162.86 |
| P04844                      | P04844                      | Dolichyl-diphosphooligosaccharide--protein glycosyltransferase subunit 2                                                                                                                              | RPN2               | 22 |    | 22 |  | 22 | By MS/MS | 54.0 | 69.28 | 0 | 323.31 |
| P78346                      | P78346                      | Ribonuclease P protein subunit p30                                                                                                                                                                    | RPP30              | 7  |    | 7  |  | 7  | By MS/MS |          |          |          |          |          |          |          |          |          |          |          |          |          |          | 36.9 | 29.32 | 0 | 30.56  |
| Q8NQG5;Q8P616               | Q8NQG5                      | Regulation of nuclear pre-mRNA domain-containing protein 1B                                                                                                                                           | RPRD1B             | 7  |    | 7  |  | 7  | By MS/MS | 32.8 | 36.90 | 0 | 148.70 |
| P46783;Q8NQ39               | P46783                      | 40S ribosomal protein S10                                                                                                                                                                             | RPS10              | 13 |    | 13 |  | 13 | By MS/MS | 65.5 | 18.90 | 0 | 323.31 |
| P62280                      | P62280                      | 40S ribosomal protein S11                                                                                                                                                                             | RPS11              | 17 |    | 17 |  | 17 | By MS/MS | 65.8 | 18.43 | 0 | 180.96 |
| P25398                      | P25398                      | 40S ribosomal protein S12                                                                                                                                                                             | RPS12              | 13 |    | 13 |  | 13 | By MS/MS | 81.8 | 14.52 | 0 | 323.31 |
| P62277                      | P62277                      | 40S ribosomal protein S13                                                                                                                                                                             | RPS13              | 14 |    | 14 |  | 14 | By MS/MS | 62.9 | 17.22 | 0 | 83.77  |
| P62263                      | P62263                      | 40S ribosomal protein S14                                                                                                                                                                             | RPS14              | 10 |    | 10 |  | 10 | By MS/MS | 41.7 | 16.27 | 0 | 313.91 |
| P62841                      | P62841                      | 40S ribosomal protein S15                                                                                                                                                                             | RPS15              | 6  |    | 6  |  | 6  | By MS/MS | 33.8 | 17.04 | 0 | 165.63 |
| P62244                      | P62244                      | 40S ribosomal protein S15a                                                                                                                                                                            | RPS15A             | 13 |    | 13 |  | 13 | By MS/MS | 76.2 | 14.84 | 0 | 125.38 |
| P62249                      | P62249                      | 40S ribosomal protein S16                                                                                                                                                                             | RPS16              | 20 |    | 20 |  | 20 | By MS/MS | 79.5 | 16.45 | 0 | 60.44  |
| P08708                      | P08708                      | 40S ribosomal protein S17                                                                                                                                                                             | RPS17              | 11 |    | 11 |  | 11 | By MS/MS | 66.7 | 15.55 | 0 | 270.67 |
| P62269                      | P62269                      | 40S ribosomal protein S18                                                                                                                                                                             | RPS18              | 20 |    | 20 |  | 20 | By MS/MS | 68.4 | 17.72 | 0 | 323.31 |
| P39019                      | P39019                      | 40S ribosomal protein S19                                                                                                                                                                             | RPS19              | 15 |    | 15 |  | 15 | By MS/MS | 63.4 | 16.06 | 0 | 99.63  |
| P15880                      | P15880                      | 40S ribosomal protein S2                                                                                                                                                                              | RPS2               | 14 |    | 14 |  | 14 | By MS/MS | 44.0 | 31.32 | 0 | 276.96 |
| P60866                      | P60866                      | 40S ribosomal protein S20                                                                                                                                                                             | RPS20              | 7  |    | 7  |  | 7  | By MS/MS | 49.6 | 13.37 | 0 | 148.19 |
| P63220                      | P63220                      | 40S ribosomal protein S21                                                                                                                                                                             | RPS21              | 9  |    | 9  |  | 9  | By MS/MS | 71.1 | 9.11  | 0 | 81.36  |
| P62266                      | P62266                      | 40S ribosomal protein S23                                                                                                                                                                             | RPS23              | 7  |    | 7  |  | 7  | By MS/MS | 49.7 | 15.81 | 0 | 158.04 |
| P62847                      | P62847                      | 40S ribosomal protein S24                                                                                                                                                                             | RPS24              | 6  |    | 6  |  | 6  | By MS/MS | 36.1 | 15.42 | 0 | 56.42  |
| P62851                      | P62851                      | 40S ribosomal protein S25                                                                                                                                                                             | RPS25              | 9  |    | 9  |  | 9  | By MS/MS | 41.6 | 13.74 | 0 | 158.94 |
| P62854;Q5JNZ5               | P62854;Q5JNZ5               | 40S ribosomal protein S26;Putative 40S ribosomal protein S26-like 1                                                                                                                                   | RPS26;RPS26P11     | 4  |    | 4  |  | 4  | By MS/MS | 37.4 | 13.02 | 0 | 52.81  |
| P42677                      | P42677                      | 40S ribosomal protein S27                                                                                                                                                                             | RPS27              | 7  |    | 7  |  | 7  | By MS/MS | 46.4 | 9.46  | 0 | 54.27  |
| P62979;P62987;POCG47;POCG48 | P62979;P62987;POCG47;POCG48 | Ubiquitin-40S ribosomal protein S27a;Ubiquitin;40S ribosomal protein S27a;Ubiquitin-60S ribosomal protein L40;Ubiquitin;60S ribosomal protein L40;Polyubiquitin-B;Ubiquitin;Polyubiquitin-C;Ubiquitin | RPS27A;UBA52;UBB C | 12 |    | 12 |  | 12 | By MS/MS | 62.8 | 17.97 | 0 | 323.31 |
| P62857                      | P62857                      | 40S ribosomal protein S28                                                                                                                                                                             | RPS28              | 8  |    | 8  |  | 8  | By MS/MS | 79.7 | 7.84  | 0 | 161.58 |
| P23396                      | P23396                      | 40S ribosomal protein S3                                                                                                                                                                              | RPS3               | 21 |    | 21 |  | 21 | By MS/MS | 69.1 | 26.69 | 0 | 323.31 |
| P61247                      | P61247                      | 40S ribosomal protein S3a                                                                                                                                                                             | RPS3A              | 19 |    | 19 |  | 19 | By MS/MS | 61.0 | 29.95 | 0 | 323.31 |
| P62701;Q8TD47;P22090        | P62701                      | 40S ribosomal protein S4, X isoform                                                                                                                                                                   | RPS4X              | 22 |    | 22 |  | 22 | By MS/MS | 60.8 | 29.60 | 0 | 323.31 |
| P46782                      | P46782                      | 40S ribosomal protein S5;40S ribosomal protein S5, N-terminally processed                                                                                                                             | RPS5               | 10 |    | 10 |  | 10 | By MS/MS | 48.0 | 22.88 | 0 | 323.31 |
| P62753                      | P62753                      | 40S ribosomal protein S6                                                                                                                                                                              | RPS6               | 11 |    | 11 |  | 11 | By MS/MS | 38.2 | 28.68 | 0 | 323.31 |
| P62081                      | P62081                      | 40S ribosomal protein S7                                                                                                                                                                              | RPS7               | 18 |    | 18 |  | 18 | By MS/MS | 68.6 | 22.13 | 0 | 49.96  |
| P62241                      | P62241                      | 40S ribosomal protein S8                                                                                                                                                                              | RPS8               | 15 |    | 15 |  | 15 | By MS/MS | 60.1 | 24.21 | 0 | 323.31 |
| P46781                      | P46781                      | 40S ribosomal protein S9                                                                                                                                                                              | RPS9               | 22 |    | 22 |  | 22 | By MS/MS | 51.5 | 22.59 | 0 | 100.83 |
| P08865                      | P08865                      | 40S ribosomal protein SA                                                                                                                                                                              | RPSA               | 19 |    | 19 |  | 19 | By MS/MS | 64.4 | 32.85 | 0 | 323.31 |
| Q92600                      | Q92600                      | Cell differentiation protein RCD1 homolog                                                                                                                                                             | RQCD1              | 7  |    | 7  |  | 7  | By MS/MS | By       |          |          |          |          |          |      |       |   |        |



[illegible]

|                      |               |                                                                                                                                       |                |     |    |     |  |    |            |            |            |            |             |            |            |            |            |            |      |        |          |        |
|----------------------|---------------|---------------------------------------------------------------------------------------------------------------------------------------|----------------|-----|----|-----|--|----|------------|------------|------------|------------|-------------|------------|------------|------------|------------|------------|------|--------|----------|--------|
| Q9P2R7               | Q9P2R7        | Succinyl-CoA ligase [ADP-forming] subunit beta, mitochondrial                                                                         | SUCLA2         | 5   |    | 5   |  | 5  | By MS/MS    | By MS/MS   |            |            | By MS/MS   |            | 14,7 | 50,32  | 0        | 5,54   |
| P53597               | P53597        | Succinyl-CoA ligase [ADP/GDP-forming] subunit alpha, mitochondrial                                                                    | SUCLG1         | 5   |    | 5   |  | 5  | By MS/MS    | By MS/MS   | By MS/MS   | By MS/MS   | By MS/MS   | By MS/MS   | 21,4 | 36,25  | 0        | 91,59  |
| Q96199               | Q96199        | Succinyl-CoA ligase [GDP-forming] subunit beta, mitochondrial                                                                         | SUCLG2         | 8   |    | 8   |  | 8  | By MS/MS    | By MS/MS   |            | By MS/MS   | By MS/MS   | By MS/MS   | 25,7 | 46,51  | 0        | 28,59  |
| Q9Y220               | Q9Y220        | Suppressor of G2 allele of SKP1 homolog                                                                                               | SUGT1          | 8   |    | 8   |  | 8  | By MS/MS    | By MS/MS   | By MS/MS   | By MS/MS   | By MS/MS   | By MS/MS   | 29,0 | 41,02  | 0        | 84,46  |
| Q9Y589               | Q9Y589        | FACT complex subunit SPT16                                                                                                            | SUPT16H        | 5   |    | 5   |  | 5  |            | By MS/MS   | By MS/MS   | By MS/MS   | By MS/MS    | By MS/MS   | By MS/MS   | By MS/MS   | By MS/MS   | By MS/MS   | 6,4  | 119,91 | 0        | 12,93  |
| O00267               | O00267        | Transcription elongation factor SPT5                                                                                                  | SUPT5H         | 11  | 11 | 11  |  | 11 | By MS/MS    | By MS/MS   |            |            | By MS/MS   | By MS/MS   | 16,3 | 121,00 | 0        | 66,58  |
| Q8IYB8               | Q8IYB8        | ATP-dependent RNA helicase SUPV3L1, mitochondrial                                                                                     | SUPV3L1        | 5   |    | 5   |  | 5  |            | By MS/MS   |            |            |             |            | By MS/MS   |            | By MS/MS   | By MS/MS   | 9,7  | 87,99  | 0        | 10,96  |
| O15260               | O15260        | Surfeit locus protein 4                                                                                                               | SURF4          | 6   |    | 6   |  | 6  | By MS/MS    | By MS/MS   | By MS/MS   | By MS/MS   | By MS/MS   | By MS/MS   | 27,5 | 30,39  | 0        | 180,99 |
| Q92797               | Q92797        | Symplekin                                                                                                                             | SYMPK          | 12  |    | 12  |  | 12 | By MS/MS    | By MS/MS   | By MS/MS   |            | By MS/MS   | By MS/MS   | 18,6 | 141,15 | 0        | 54,41  |
| O60506               | O60506        | Heterogeneous nuclear ribonucleoprotein Q                                                                                             | SYNCRIP        | 24  |    | 24  |  | 19 | By MS/MS    | By MS/MS   | By MS/MS   | By MS/MS   | By MS/MS   | By MS/MS   | 40,8 | 69,60  | 0        | 312,65 |
| Q92804               | Q92804        | TATA-binding protein-associated factor 2N                                                                                             | TAFA15         | 4   |    | 2   |  | 2  |            | By MS/MS   |            | By matchin | By matching | By MS/MS   | By MS/MS   | By matchin | By matchin | By matchin | 9,8  | 61,83  | 0        | 9,74   |
| P37802;Q9U115        | P37802        | Transgelin-2                                                                                                                          | TAGLN2         | 22  |    | 22  |  | 22 | By MS/MS    | By MS/MS   | By MS/MS   | By MS/MS   | By MS/MS   | By MS/MS   | 90,5 | 22,39  | 0        | 323,31 |
| P37837               | P37837        | Transaldolase                                                                                                                         | TALDO1         | 22  |    | 22  |  | 22 | By MS/MS    | By MS/MS   | By MS/MS   | By MS/MS   | By MS/MS   | By MS/MS   | 52,5 | 37,54  | 0        | 323,31 |
| Q96BW9               | Q96BW9        | Phosphatidate cytidylyltransferase, mitochondrial                                                                                     | TAMM41         | 5   |    | 5   |  | 5  | By MS/MS    | By MS/MS   |            | By MS/MS   | By MS/MS   | By MS/MS   | 12,4 | 51,07  | 0        | 83,78  |
| Q13148               | Q13148        | TAR DNA-binding protein 43                                                                                                            | TARDBP         | 8   |    | 8   |  | 8  | By MS/MS    | By MS/MS   | By MS/MS   | By MS/MS   | By MS/MS   | By MS/MS   | 35,3 | 44,74  | 0        | 307,49 |
| P26639;A2RTX5        | P26639        | Theonine--RNA ligase, cytoplasmic                                                                                                     | TARS           | 31  |    | 31  |  | 31 | By MS/MS    | By MS/MS   | By MS/MS   | By MS/MS   | By MS/MS   | By MS/MS   | 46,9 | 83,43  | 0        | 205,24 |
| O75347               | O75347        | Tubulin-specific chaperone A                                                                                                          | TBCA           | 10  |    | 10  |  | 10 | By MS/MS    | By MS/MS   | By MS/MS   | By MS/MS   | By MS/MS   | By MS/MS   | 62,0 | 12,86  | 0        | 154,28 |
| Q9BTW9               | Q9BTW9        | Tubulin-specific chaperone D                                                                                                          | TBCD           | 13  |    | 13  |  | 13 | By MS/MS    | By MS/MS   | By MS/MS   | By MS/MS   |            | By MS/MS   | 16,4 | 132,60 | 0        | 24,54  |
| Q15813               | Q15813        | Tubulin-specific chaperone E                                                                                                          | TBCE           | 9   |    | 9   |  | 9  | By MS/MS    | By MS/MS   |            | By MS/MS   | By MS/MS   | By MS/MS   | 31,1 | 59,35  | 0        | 55,06  |
| Q9BZK7;O60907;Q9BQ87 | Q9BZK7;O60907 | F-box-like/WD repeat-containing protein TBL1XR1;F-box-like/WD repeat-containing protein TBL11X                                        | TBL1XR1;TBL1X  | 5   |    | 5   |  | 5  | By MS/MS    | By MS/MS   |            |            | By MS/MS   | By MS/MS   | 18,1 | 55,59  | 0        | 17,13  |
| Q9Y4P3               | Q9Y4P3        | Transducin beta-like protein 2                                                                                                        | TBL2           | 4   |    | 4   |  | 4  | By MS/MS   |            | By MS/MS   |            |             |            | By MS/MS   | By MS/MS   | By MS/MS   | By MS/MS   | 13,6 | 49,80  | 0        | 40,58  |
| Q12788               | Q12788        | Transducin beta-like protein 3                                                                                                        | TBL3           | 5   |    | 5   |  | 5  |            |            |            |            | By MS/MS    | By MS/MS   | By MS/MS   | By MS/MS   | By MS/MS   | By MS/MS   | 10,1 | 89,03  | 0        | 11,16  |
| Q96920               | Q96920        | Protein TBRC64                                                                                                                        | TBRG4          | 17  |    | 17  |  | 17 | By MS/MS    | By MS/MS   | By MS/MS   | By MS/MS   | By MS/MS   | By MS/MS   | 50,6 | 70,74  | 0        | 60,81  |
| P23193;Q15560        | P23193        | Transcription elongation factor A protein 1                                                                                           | TCEA1          | 9   |    | 9   |  | 9  | By MS/MS   |            | By MS/MS   | By MS/MS   | By MS/MS    | By MS/MS   | By MS/MS   | By MS/MS   | By MS/MS   | By MS/MS   | 37,5 | 33,97  | 0        | 24,11  |
| Q15369               | Q15369        | Transcription elongation factor B polypeptide 1                                                                                       | TCEB1          | 6   |    | 6   |  | 6  | By MS/MS    | By MS/MS   | By MS/MS   | By MS/MS   | By MS/MS   | By MS/MS   | 54,5 | 12,47  | 0        | 84,56  |
| Q15370               | Q15370        | Transcription elongation factor B polypeptide 2                                                                                       | TCEB2          | 8   |    | 8   |  | 8  | By MS/MS    | By MS/MS   | By MS/MS   | By MS/MS   | By MS/MS   | By MS/MS   | 59,3 | 13,13  | 0        | 19,29  |
| O14776               | O14776        | Transcription elongation regulator 1                                                                                                  | TCERG1         | 10  |    | 10  |  | 10 | By MS/MS    | By MS/MS   | By MS/MS   |            | By MS/MS   | By MS/MS   | 11,9 | 123,90 | 0        | 16,01  |
| P17987               | P17987        | T-complex protein 1 subunit alpha                                                                                                     | TCF1           | 39  |    | 39  |  | 39 | By MS/MS    | By MS/MS   | By MS/MS   | By MS/MS   | By MS/MS   | By MS/MS   | 82,6 | 60,34  | 0        | 323,31 |
| Q9NZ01               | Q9NZ01        | Very-long-chain enoyl-CoA reductase                                                                                                   | TECR           | 8   |    | 8   |  | 8  | By MS/MS    | By MS/MS   | By MS/MS   | By MS/MS   | By MS/MS   | By MS/MS   | 23,7 | 36,03  | 0        | 16,21  |
| Q9NXF1               | Q9NXF1        | Testis-expressed sequence 10 protein                                                                                                  | TEX10          | 4   |    | 4   |  | 4  | By MS/MS   | By MS/MS   | By MS/MS   | By MS/MS   |             | By MS/MS   | 6,6  | 105,67 | 0        | 9,42   |
| Q00059               | Q00059        | Transcription factor A, mitochondrial                                                                                                 | TFAM           | 8   |    | 8   |  | 8  | By MS/MS    | By MS/MS   | By MS/MS   | By MS/MS   | By MS/MS   | By MS/MS   | 33,3 | 29,10  | 0        | 59,68  |
| Q92734               | Q92734        | Protein TFG                                                                                                                           | TFG            | 5   |    | 5   |  | 5  | By MS/MS    | By MS/MS   | By MS/MS   | By MS/MS   | By MS/MS   | By MS/MS   | 16,5 | 43,45  | 0        | 15,83  |
| P02786               | P02786        | Transferrin receptor protein 1;Transferrin receptor protein 1, serum form                                                             | TFR            | 28  |    | 28  |  | 28 | By MS/MS    | By MS/MS   | By MS/MS   | By MS/MS   | By MS/MS   | By MS/MS   | 43,3 | 84,87  | 0        | 323,31 |
| P21980               | P21980        | Protein-glutamine gamma-glutamyltransferase 2                                                                                         | TGM2           | 6   |    | 6   |  | 6  | By MS/MS    | By MS/MS   | By MS/MS   | By MS/MS   | By MS/MS   | By MS/MS   | 12,2 | 77,33  | 0        | 14,55  |
| Q8NI27               | Q8NI27        | THO complex subunit 2                                                                                                                 | THOC2          | 6   |    | 6   |  | 6  | By MS/MS    | By MS/MS   | By MS/MS   | By MS/MS   | By MS/MS   | By MS/MS   | 4,3  | 182,77 | 0        | 11,96  |
| Q86W42               | Q86W42        | THO complex subunit 6 homolog                                                                                                         | THOC6          | 5   |    | 5   |  | 5  | By MS/MS    | By MS/MS   | By MS/MS   | By MS/MS   | By MS/MS   | By MS/MS   | 25,8 | 37,54  | 0        | 33,81  |
| P52888               | P52888        | Thimet oligopeptidase                                                                                                                 | THOP1          | 5   |    | 5   |  | 5  | By MS/MS    | By MS/MS   | By MS/MS   | By MS/MS   | By MS/MS   | By MS/MS   | 11,2 | 78,84  | 0        | 81,80  |
| Q9NXG2               | Q9NXG2        | THUMP domain-containing protein 1                                                                                                     | THUMPD1        | 5   |    | 5   |  | 5  | By MS/MS    | By MS/MS   |            | By MS/MS   | By MS/MS   | By MS/MS   | 24,9 | 39,32  | 0        | 25,24  |
| P31483               | P31483        | Nucleolysin TIA-1 isoform p40                                                                                                         | TIA1           | 4   |    | 4   |  | 2  |            | By MS/MS   |            | By MS/MS   | By MS/MS    | By MS/MS   | By MS/MS   | By MS/MS   | By MS/MS   | By MS/MS   | 12,4 | 42,96  | 0        | 15,38  |
| Q9Y5L4               | Q9Y5L4        | Mitochondrial import inner membrane translocase subunit Tim13                                                                         | TIMM13         | 5   |    | 5   |  | 5  | By MS/MS    | By MS/MS   | By MS/MS   | By MS/MS   | By MS/MS   | By MS/MS   | 62,1 | 10,50  | 0        | 126,51 |
| P060830              | P060830       | Mitochondrial import inner membrane translocase subunit Tim17-B                                                                       | TIMM17B        | 4   |    | 4   |  | 3  | By MS/MS    | By MS/MS   | By MS/MS   | By MS/MS   | By MS/MS   | By MS/MS   | 37,2 | 18,27  | 0        | 7,01   |
| O14925;Q5SRD1        | O14925;Q5SRD1 | Mitochondrial import inner membrane translocase subunit Tim23;Putative mitochondrial import inner membrane translocase subunit Tim23B | TIMM23;TIMM23B | 5   |    | 5   |  | 5  | By MS/MS    | By MS/MS   | By MS/MS   | By MS/MS   | By MS/MS   | By MS/MS   | 27,3 | 21,94  | 0        | 95,94  |
| Q043615              | Q043615       | Mitochondrial import inner membrane translocase subunit TIM44                                                                         | TIMM44         | 16  |    | 16  |  | 16 | By MS/MS    | By MS/MS   | By MS/MS   | By MS/MS   | By MS/MS   | By MS/MS   | 33,4 | 51,36  | 0        | 148,50 |
| Q3ZCQ8               | Q3ZCQ8        | Mitochondrial import inner membrane translocase subunit TIM50                                                                         | TIMM50         | 7   |    | 7   |  | 7  | By MS/MS    | By MS/MS   | By MS/MS   | By MS/MS   | By MS/MS   | By MS/MS   | 23,5 | 39,65  | 0        | 79,48  |
| O60220               | O60220        | Mitochondrial import inner membrane translocase subunit Tim8 A                                                                        | TIMM8A         | 4   |    | 4   |  | 4  | By MS/MS    | By MS/MS   |            |            |            | By MS/MS   | 63,9 | 11,00  | 0        | 18,94  |
| O75663               | O75663        | TIP41-like protein                                                                                                                    | TIPRL          | 7   |    | 7   |  | 7  | By MS/MS   | By MS/MS   | By MS/MS   |            | By MS/MS    | By MS/MS   |            |            | By MS/MS   | By MS/MS   | 41,9 | 31,44  | 0        | 13,18  |
| P04183               | P04183        | Thymidine kinase, cytosolic                                                                                                           | TK1            | 11  |    | 11  |  | 11 | By MS/MS    | By MS/MS   | By MS/MS   | By MS/MS   | By MS/MS   | By MS/MS   | 65,0 | 25,47  | 0        | 42,34  |
| P29401               | P29401        | Transketolase                                                                                                                         | TKT            | 29  |    | 29  |  | 29 | By MS/MS    | By MS/MS   | By MS/MS   | By MS/MS   | By MS/MS   | By MS/MS   | 64,7 | 67,88  | 0        | 323,31 |
| Q9Y490               | Q9Y490        | Talin-1                                                                                                                               | TLN1           | 100 |    | 100 |  | 91 | By MS/MS    | By MS/MS   | By MS/MS   | By MS/MS   | By MS/MS   | By MS/MS   | 61,3 | 269,76 | 0        | 323,31 |
| Q9Y4G6               | Q9Y4G6        | Talin-2                                                                                                                               | TLN2           | 12  |    | 3   |  | 3  | By matchin | By matchin | By matchin | By MS/MS   | By matchin  | By matchin | By matchin | By matchin | By matchin | By matchin | 5,3  | 271,61 | 0,000343 | 2,65   |
| Q9HD45               | Q9HD45        | Transmembrane9 superfamily member 3                                                                                                   | TMB9SF3        | 4   |    | 4   |  | 4  |            | By matchin | By matchin | By matchin | By MS/MS    | By matchin | By MS/MS   | By matchin | By MS/MS   | By MS/MS   | 6,8  | 67,89  | 0        | 5,75   |
| P49755               | P49755        | Transmembrane emp24 domain-containing protein 10                                                                                      | TMED10         | 12  |    | 12  |  | 12 | By MS/MS    | By MS/MS   | By MS/MS   | By MS/MS   | By MS/MS   | By MS/MS   | 42,5 | 24,98  | 0        | 307,84 |
| Q15363               | Q15363        | Transmembrane emp24 domain-containing protein 2                                                                                       | TMED2          | 4   |    | 4   |  | 4  | By MS/MS    | By MS/MS   | By MS/MS   | By MS/MS   | By MS/MS   | By MS/MS   | 24,9 | 22,76  | 0        | 16,46  |
| Q9Y383               | Q9Y383        | Transmembrane emp24 domain-containing protein 7                                                                                       | TMED7          | 4   |    | 4   |  | 4  | By MS/MS    | By MS/MS   | By MS/MS   | By MS/MS   | By MS/MS   | By MS/MS   | 23,2 | 25,17  | 0        | 5,22   |
| Q9BVK6               | Q9BVK6        | Transmembrane emp24 domain-containing protein 9                                                                                       | TMED9          | 6   |    | 6   |  | 5  | By MS/MS    | By MS/MS   | By MS/MS   | By MS/MS   | By MS/MS   | By MS/MS   | 26,8 | 27,28  | 0        | 323,31 |
| P57088               | P57088        | Transmembrane protein 33                                                                                                              | TMEM33         | 8   |    | 8   |  | 8  | By MS/MS    | By MS/MS   | By MS/MS   | By MS/MS   | By MS/MS   | By MS/MS   | 25,5 | 27,98  | 0        | 56,60  |
| Q9BTV4               | Q9BTV4        | Transmembrane protein 43                                                                                                              | TMEM43         | 8   |    | 8   |  | 8  | By MS/MS    | By MS/MS   | By MS/MS   | By MS/MS   | By MS/MS   | By MS/MS   | 34,2 | 44,88  | 0        | 45,37  |
| P42166               | P42166        | Lamina-associated polypeptide 2, isoform alpha;Thymopoietin;Thymopentin                                                               | TMPO           | 9   |    | 9   |  | 3  | By MS/MS    | By MS/MS   | By MS/MS   | By MS/MS   | By MS/MS   | By MS/MS   | 23,3 | 75,49  | 0        | 242,88 |
| P42167               | P42167        | Lamina-associated polypeptide 2, isoforms beta/gamma;Thymopoietin;Thymopentin                                                         | TMPO           | 9   |    | 3   |  | 3  | By matchin  | By matchin | By MS/MS   | By MS/MS   | By matchin | By matchin | 34,8 | 50,67  | 0        | 27,12  |
| Q9H3N1               | Q9H3N1        | Thioredoxin-related transmembrane protein 1                                                                                           | TMX1           | 4   |    | 4   |  | 4  | By MS/MS    | By MS/MS   | By MS/MS   | By MS/MS   | By MS/MS   | By MS/MS   | 20,0 | 31,79  | 0        | 10,21  |
| Q9Y320               | Q9Y320        | Thioredoxin-related transmembrane protein 2                                                                                           | TMX2           | 4   |    | 4   |  | 4  | By MS/MS    | By MS/MS   | By MS/MS   | By MS/MS   | By MS/MS   | By MS/MS   | 17,6 | 34,04  | 0        | 15,59  |
| Q92973               | Q92973        | Transportin-1                                                                                                                         | TNP01          | 23  |    | 23  |  | 21 | By MS/MS    | By MS/MS   | By MS/MS   | By MS/MS   | By MS/MS   | By MS/MS   | 34,6 | 102,35 | 0        | 289,96 |
| Q9Y5L0               | Q9Y5L0        | Transportin-3                                                                                                                         | TNP03          | 11  |    | 11  |  | 11 | By MS/MS    | By         |            |            |            |            |      |        |          |        |



[illegible]

|                      |               |                                                                                                                                                         |                   |    |    |    |          |          |          |          |          |          |          |          |          |          |          |          |      |        |   |        |
|----------------------|---------------|---------------------------------------------------------------------------------------------------------------------------------------------------------|-------------------|----|----|----|----------|----------|----------|----------|----------|----------|----------|----------|----------|----------|----------|----------|------|--------|---|--------|
| P61081               | P61081        | NEDD8-conjugating enzyme Ubc12                                                                                                                          | UBE2M             | 6  | 6  | 6  | By MS/MS | 33,3 | 20,90  | 0 | 93,79  |
| P61088;Q5JXB2        | P61088;Q5JXB2 | Ubiquitin-conjugating enzyme E2 N;Putative ubiquitin-conjugating enzyme E2 N-like                                                                       | UBE2N;UBE2NL      | 12 | 12 | 12 | By MS/MS | 65,8 | 17,14  | 0 | 227,95 |
| Q9C0C9               | Q9C0C9        | E2/E3 hybrid ubiquitin-protein ligase UBE2O                                                                                                             | UBE2O             | 6  | 7  | 6  | By MS/MS | 7,9  | 141,29 | 0 | 9,66   |
| Q16763               | Q16763        | Ubiquitin-conjugating enzyme E2 5                                                                                                                       | UBE2S             | 7  | 7  | 7  | By MS/MS | 46,4 | 23,85  | 0 | 22,34  |
| Q9NPD8               | Q9NPD8        | Ubiquitin-conjugating enzyme E2 T                                                                                                                       | UBE2T             | 6  | 6  | 6  | By MS/MS | 30,5 | 22,52  | 0 | 7,17   |
| Q13404               | Q13404        | Ubiquitin-conjugating enzyme E2 variant 1                                                                                                               | UBE2V1            | 12 | 6  | 6  | By MS/MS | 78,9 | 16,50  | 0 | 16,66  |
| Q15819               | Q15819        | Ubiquitin-conjugating enzyme E2 variant 2                                                                                                               | UBE2V2            | 12 | 12 | 6  | By MS/MS | 78,6 | 16,36  | 0 | 140,15 |
| Q14139               | Q14139        | Ubiquitin conjugation factor E4 A                                                                                                                       | UBE4A             | 10 | 10 | 10 | By MS/MS | 14,3 | 122,56 | 0 | 25,11  |
| Q95155               | Q95155        | Ubiquitin conjugation factor E4 B                                                                                                                       | UBE4B             | 6  | 6  | 6  | By MS/MS | 7,6  | 146,18 | 0 | 28,84  |
| P11441               | P11441        | Ubiquitin-like protein 4A                                                                                                                               | UBL4A             | 7  | 7  | 7  | By MS/MS | 51,6 | 17,78  | 0 | 21,87  |
| Q8WVV7               | Q8WVV7        | Ubiquitin-like domain-containing CTD phosphatase 1                                                                                                      | UBLCP1            | 7  | 7  | 7  | By MS/MS | 22,6 | 36,80  | 0 | 8,40   |
| Q9NRR5               | Q9NRR5        | Ubiquitin-in-4                                                                                                                                          | UBLQ14            | 4  | 4  | 2  | By MS/MS | 12,1 | 63,85  | 0 | 6,57   |
| Q5T457               | Q5T457        | E3 ubiquitin-protein ligase UBR4                                                                                                                        | UBR4              | 54 | 54 | 54 | By MS/MS | 18,2 | 573,83 | 0 | 313,05 |
| Q04323               | Q04323        | UBX domain-containing protein 1                                                                                                                         | UBXN1             | 5  | 5  | 5  | By MS/MS | 27,9 | 33,33  | 0 | 22,06  |
| P15374               | P15374        | Ubiquitin carboxyl-terminal hydrolase isozyme L3                                                                                                        | UCHL3             | 12 | 12 | 12 | By MS/MS | 67,8 | 26,18  | 0 | 88,11  |
| Q9YK55               | Q9YK55        | Ubiquitin carboxyl-terminal hydrolase isozyme L5                                                                                                        | UCHL5             | 12 | 12 | 12 | By MS/MS | 46,5 | 37,61  | 0 | 56,58  |
| Q9BXZ2;Q9HA47        | Q9BXZ2        | Uridine-cytidine kinase 2                                                                                                                               | UCK2              | 5  | 5  | 5  | By MS/MS | 21,8 | 29,30  | 0 | 7,75   |
| Q92890               | Q92890        | Ubiquitin fusion degradation protein 1 homolog                                                                                                          | UFD1L             | 6  | 6  | 6  | By MS/MS | 30,3 | 34,50  | 0 | 8,46   |
| Q94874               | Q94874        | E3 UFM1-protein ligase 1                                                                                                                                | UFL1              | 7  | 7  | 7  | By MS/MS | 13,6 | 89,59  | 0 | 65,89  |
| Q60701               | Q60701        | UDP-glucose 6-dehydrogenase                                                                                                                             | UGDH              | 5  | 5  | 5  | By MS/MS | 18,0 | 55,02  | 0 | 15,05  |
| Q9NYU2               | Q9NYU2        | UDP-glucose-glycoprotein glucosyltransferase 1                                                                                                          | UGGT1             | 22 | 22 | 22 | By MS/MS | 23,3 | 177,19 | 0 | 305,13 |
| Q16851               | Q16851        | UTP-glucose-1-phosphate uridylyltransferase                                                                                                             | UGP2              | 6  | 6  | 6  | By MS/MS | 17,3 | 56,94  | 0 | 127,31 |
| P11172               | P11172        | Uridine 5-monophosphate synthase;Orotate phosphoribosyltransferase;Orotidine 5-phosphate decarboxylase                                                  | UMPS              | 4  | 4  | 4  | By MS/MS | 12,1 | 52,22  | 0 | 21,97  |
| Q9H3U1               | Q9H3U1        | Protein unc-45 homolog A                                                                                                                                | UNC45A            | 4  | 4  | 4  | By MS/MS | 7,5  | 103,08 | 0 | 37,41  |
| Q92900               | Q92900        | Regulator of nonsense transcripts 1                                                                                                                     | UPF1              | 28 | 28 | 28 | By MS/MS | 32,6 | 124,34 | 0 | 256,83 |
| Q9NVA1               | Q9NVA1        | Ubiquinol-cytochrome-c reductase complex assembly factor 1                                                                                              | UQCQ1             | 5  | 5  | 5  | By MS/MS | 14,0 | 34,60  | 0 | 9,89   |
| Q9BRT2               | Q9BRT2        | Ubiquinol-cytochrome-c reductase complex assembly factor 2                                                                                              | UQCQ2             | 5  | 5  | 5  | By MS/MS | 47,6 | 14,88  | 0 | 10,11  |
| P14927               | P14927        | Cytochrome b-c1 complex subunit 7                                                                                                                       | UQCQB             | 9  | 9  | 9  | By MS/MS | 59,5 | 13,53  | 0 | 29,53  |
| P31930               | P31930        | Cytochrome b-c1 complex subunit 1, mitochondrial                                                                                                        | UQCRC1            | 15 | 15 | 15 | By MS/MS | 45,8 | 52,65  | 0 | 323,31 |
| P22695               | P22695        | Cytochrome b-c1 complex subunit 2, mitochondrial                                                                                                        | UQCRC2            | 17 | 17 | 17 | By MS/MS | 47,7 | 48,44  | 0 | 323,31 |
| P47985;P0C7P4        | P47985;P0C7P4 | Cytochrome b-c1 complex subunit Rieske, mitochondrial;Cytochrome b-c1 complex subunit 11;Putative cytochrome b-c1 complex subunit Rieske-like protein 1 | UQCRCF1;UQCRCF5P1 | 9  | 9  | 9  | By MS/MS | 41,2 | 29,67  | 0 | 213,20 |
| Q14949               | Q14949        | Cytochrome b-c1 complex subunit 8                                                                                                                       | UQCRCQ            | 4  | 4  | 4  | By MS/MS | 36,6 | 9,91   | 0 | 11,83  |
| Q60287               | Q60287        | Nucleolar pre-ribosomal-associated protein 1                                                                                                            | URB1              | 5  | 5  | 5  | By MS/MS | 3,7  | 254,39 | 0 | 8,34   |
| P06132               | P06132        | Uroporphyrinogen decarboxylase                                                                                                                          | UROD              | 17 | 17 | 17 | By MS/MS | 75,7 | 40,79  | 0 | 175,50 |
| Q96IX5               | Q96IX5        | Up-regulated during skeletal muscle growth protein 5                                                                                                    | USMG5             | 4  | 4  | 4  | By MS/MS | 44,8 | 6,46   | 0 | 323,31 |
| Q60763               | Q60763        | General vesicular transport factor p115                                                                                                                 | USO1              | 12 | 12 | 12 | By MS/MS | 17,6 | 107,89 | 0 | 147,63 |
| Q14694               | Q14694        | Ubiquitin carboxyl-terminal hydrolase 10                                                                                                                | USP10             | 13 | 13 | 13 | By MS/MS | 24,8 | 87,13  | 0 | 33,13  |
| P54578               | P54578        | Ubiquitin carboxyl-terminal hydrolase 14                                                                                                                | USP14             | 20 | 20 | 20 | By MS/MS | 51,2 | 56,07  | 0 | 260,42 |
| Q9Y4E8               | Q9Y4E8        | Ubiquitin carboxyl-terminal hydrolase 15                                                                                                                | USP15             | 27 | 27 | 26 | By MS/MS | 34,8 | 112,42 | 0 | 195,61 |
| Q53G59               | Q53G59        | U4/U6,U5 tri-snRNP-associated protein 2                                                                                                                 | USP39             | 6  | 6  | 6  | By MS/MS | 19,1 | 65,38  | 0 | 25,04  |
| P45974               | P45974        | Ubiquitin carboxyl-terminal hydrolase 5                                                                                                                 | USP5              | 10 | 10 | 9  | By MS/MS | 18,1 | 95,79  | 0 | 143,47 |
| Q93009               | Q93009        | Ubiquitin carboxyl-terminal hydrolase 7                                                                                                                 | USP7              | 20 | 20 | 20 | By MS/MS | 26,9 | 128,30 | 0 | 191,58 |
| P63027;P23763        | P63027        | Vesicle-associated membrane protein 2                                                                                                                   | VAMP2             | 5  | 5  | 2  | By MS/MS | 54,3 | 12,66  | 0 | 67,99  |
| P51809               | P51809        | Vesicle-associated membrane protein 7                                                                                                                   | VAMP7             | 7  | 7  | 7  | By MS/MS | 39,5 | 24,94  | 0 | 23,89  |
| Q9P0L0               | Q9P0L0        | Vesicle-associated membrane protein-associated protein A                                                                                                | VAPA              | 9  | 9  | 8  | By MS/MS | 36,5 | 27,89  | 0 | 37,20  |
| Q95292               | Q95292        | Vesicle-associated membrane protein-associated protein B/C                                                                                              | VAPB              | 5  | 4  | 4  | By MS/MS | 23,5 | 27,23  | 0 | 17,91  |
| P26640               | P26640        | Valine-tRNA ligase                                                                                                                                      | VARS              | 53 | 53 | 53 | By MS/MS | 48,7 | 140,47 | 0 | 323,31 |
| P50552               | P50552        | Vasodilator-stimulated phosphoprotein                                                                                                                   | VASP              | 6  | 6  | 6  | By MS/MS | 22,1 | 39,83  | 0 | 21,90  |
| Q99536               | Q99536        | Synaptic vesicle membrane protein VAT-1 homolog                                                                                                         | VATP1             | 18 | 18 | 18 | By MS/MS | 68,4 | 41,92  | 0 | 103,73 |
| P61758               | P61758        | Prefoldin subunit 3                                                                                                                                     | VPB1              | 10 | 10 | 10 | By MS/MS | 47,7 | 22,66  | 0 | 20,13  |
| P18206               | P18206        | Vinculin                                                                                                                                                | VCL               | 60 | 60 | 60 | By MS/MS | 58,4 | 123,80 | 0 | 323,31 |
| P55072               | P55072        | Transitional endoplasmic reticulum ATPase                                                                                                               | VCP               | 47 | 47 | 47 | By MS/MS | 68,1 | 89,32  | 0 | 323,31 |
| Q96JH7               | Q96JH7        | Deubiquitinating protein VCP135                                                                                                                         | VCPI1             | 4  | 4  | 4  | By MS/MS | 4,9  | 134,32 | 0 | 41,06  |
| P21796               | P21796        | Voltage-dependent anion-selective channel protein 1                                                                                                     | VDAC1             | 20 | 20 | 20 | By MS/MS | 84,1 | 30,77  | 0 | 323,31 |
| P45880               | P45880        | Voltage-dependent anion-selective channel protein 2                                                                                                     | VDAC2             | 17 | 17 | 17 | By MS/MS | 61,6 | 31,57  | 0 | 323,31 |
| Q9Y277               | Q9Y277        | Voltage-dependent anion-selective channel protein 3                                                                                                     | VDAC3             | 15 | 15 | 15 | By MS/MS | 58,3 | 30,66  | 0 | 226,98 |
| P08670;P17661;P41219 | P08670        | Vimentin                                                                                                                                                | VIM               | 28 | 27 | 27 | By MS/MS | 66,1 | 53,65  | 0 | 323,31 |
| Q75436               | Q75436        | Vacuolar protein sorting-associated protein 26A                                                                                                         | VPS26A            | 7  | 7  | 6  | By MS/MS | 30,0 | 38,17  | 0 | 37,74  |
| Q9UK41               | Q9            |                                                                                                                                                         |                   |    |    |    |          |          |          |          |          |          |          |          |          |          |          |          |      |        |   |        |

|        |        |                                 |       |   |  |   |  |   |          |          |          |          |          |          |          |          |          |          |          |          |          |          |          |          |          |          |          |          |          |          |          |          |          |          |          |          |          |          |          |          |          |          |          |          |          |          |          |          |          |          |          |          |          |          |          |          |          |          |          |          |          |          |          |          |          |          |          |          |          |          |          |          |          |          |          |          |          |          |          |          |          |          |          |          |          |          |          |          |          |          |          |          |          |          |          |          |          |          |          |          |          |          |          |          |          |          |          |          |          |          |          |          |          |          |          |          |          |          |          |          |          |          |          |          |          |          |          |          |          |          |          |          |          |          |          |          |          |          |          |          |          |          |          |          |          |          |          |          |          |          |          |          |          |          |          |          |          |          |          |          |          |          |          |          |          |          |          |          |          |          |          |          |          |          |          |          |          |          |          |          |          |          |          |          |          |          |          |          |          |          |          |          |          |          |          |          |          |          |          |          |          |          |          |          |          |          |          |          |          |          |          |          |          |          |          |          |          |          |          |          |          |          |          |          |          |          |          |          |          |          |          |          |          |          |          |          |          |          |          |          |          |          |          |          |          |          |          |          |          |          |          |          |          |          |          |          |          |          |          |          |          |          |          |          |          |          |          |          |          |          |          |          |          |          |          |          |          |          |          |          |          |          |          |          |          |          |          |          |          |          |          |          |          |          |          |          |          |          |          |          |          |          |          |          |          |          |          |          |          |          |          |          |          |          |          |          |          |          |          |          |          |          |          |          |          |          |          |          |          |          |          |          |          |          |          |          |          |          |          |          |          |          |          |          |          |          |          |          |          |          |          |          |          |          |          |          |          |          |          |          |          |          |          |          |          |          |          |          |          |          |          |          |          |          |          |          |          |          |          |          |          |          |          |          |          |          |          |          |          |          |          |          |          |          |          |          |          |          |          |          |          |          |          |          |          |          |          |          |          |          |          |          |          |          |          |          |          |          |          |          |          |          |          |          |          |          |          |          |          |          |          |          |          |          |          |          |          |          |          |          |          |          |          |          |          |          |          |          |          |          |          |          |          |          |          |          |          |          |          |          |          |          |          |          |          |          |          |          |          |          |          |          |          |          |          |          |          |          |          |          |          |          |          |          |          |          |          |          |          |          |          |          |          |          |          |          |          |          |          |          |          |          |          |          |          |          |          |          |          |          |          |          |          |          |          |          |          |          |          |          |          |          |          |          |          |          |          |          |          |          |          |          |          |          |          |          |          |          |          |          |          |          |          |          |          |          |          |          |          |          |          |          |          |          |          |          |          |          |          |          |          |          |          |          |          |          |          |          |          |          |          |          |          |          |          |          |          |          |          |          |          |          |          |          |          |          |          |          |          |          |          |          |          |          |          |          |          |          |          |          |          |          |          |          |          |          |          |          |          |          |          |          |          |          |          |          |          |          |          |          |          |          |          |          |          |          |          |          |          |          |          |          |          |          |          |          |          |          |          |          |          |          |          |          |          |          |          |          |          |          |          |          |          |          |          |          |          |          |          |          |          |          |          |          |          |          |          |          |          |          |          |          |          |          |          |          |          |          |          |          |          |          |          |          |          |          |          |          |          |          |          |          |          |          |          |          |          |          |          |          |          |          |          |          |          |          |          |          |          |          |          |          |          |          |          |          |          |          |          |          |          |          |          |          |          |          |          |          |          |          |          |          |          |          |          |          |          |          |          |          |          |          |
|--------|--------|---------------------------------|-------|---|--|---|--|---|----------|----------|----------|----------|----------|----------|----------|----------|----------|----------|----------|----------|----------|----------|----------|----------|----------|----------|----------|----------|----------|----------|----------|----------|----------|----------|----------|----------|----------|----------|----------|----------|----------|----------|----------|----------|----------|----------|----------|----------|----------|----------|----------|----------|----------|----------|----------|----------|----------|----------|----------|----------|----------|----------|----------|----------|----------|----------|----------|----------|----------|----------|----------|----------|----------|----------|----------|----------|----------|----------|----------|----------|----------|----------|----------|----------|----------|----------|----------|----------|----------|----------|----------|----------|----------|----------|----------|----------|----------|----------|----------|----------|----------|----------|----------|----------|----------|----------|----------|----------|----------|----------|----------|----------|----------|----------|----------|----------|----------|----------|----------|----------|----------|----------|----------|----------|----------|----------|----------|----------|----------|----------|----------|----------|----------|----------|----------|----------|----------|----------|----------|----------|----------|----------|----------|----------|----------|----------|----------|----------|----------|----------|----------|----------|----------|----------|----------|----------|----------|----------|----------|----------|----------|----------|----------|----------|----------|----------|----------|----------|----------|----------|----------|----------|----------|----------|----------|----------|----------|----------|----------|----------|----------|----------|----------|----------|----------|----------|----------|----------|----------|----------|----------|----------|----------|----------|----------|----------|----------|----------|----------|----------|----------|----------|----------|----------|----------|----------|----------|----------|----------|----------|----------|----------|----------|----------|----------|----------|----------|----------|----------|----------|----------|----------|----------|----------|----------|----------|----------|----------|----------|----------|----------|----------|----------|----------|----------|----------|----------|----------|----------|----------|----------|----------|----------|----------|----------|----------|----------|----------|----------|----------|----------|----------|----------|----------|----------|----------|----------|----------|----------|----------|----------|----------|----------|----------|----------|----------|----------|----------|----------|----------|----------|----------|----------|----------|----------|----------|----------|----------|----------|----------|----------|----------|----------|----------|----------|----------|----------|----------|----------|----------|----------|----------|----------|----------|----------|----------|----------|----------|----------|----------|----------|----------|----------|----------|----------|----------|----------|----------|----------|----------|----------|----------|----------|----------|----------|----------|----------|----------|----------|----------|----------|----------|----------|----------|----------|----------|----------|----------|----------|----------|----------|----------|----------|----------|----------|----------|----------|----------|----------|----------|----------|----------|----------|----------|----------|----------|----------|----------|----------|----------|----------|----------|----------|----------|----------|----------|----------|----------|----------|----------|----------|----------|----------|----------|----------|----------|----------|----------|----------|----------|----------|----------|----------|----------|----------|----------|----------|----------|----------|----------|----------|----------|----------|----------|----------|----------|----------|----------|----------|----------|----------|----------|----------|----------|----------|----------|----------|----------|----------|----------|----------|----------|----------|----------|----------|----------|----------|----------|----------|----------|----------|----------|----------|----------|----------|----------|----------|----------|----------|----------|----------|----------|----------|----------|----------|----------|----------|----------|----------|----------|----------|----------|----------|----------|----------|----------|----------|----------|----------|----------|----------|----------|----------|----------|----------|----------|----------|----------|----------|----------|----------|----------|----------|----------|----------|----------|----------|----------|----------|----------|----------|----------|----------|----------|----------|----------|----------|----------|----------|----------|----------|----------|----------|----------|----------|----------|----------|----------|----------|----------|----------|----------|----------|----------|----------|----------|----------|----------|----------|----------|----------|----------|----------|----------|----------|----------|----------|----------|----------|----------|----------|----------|----------|----------|----------|----------|----------|----------|----------|----------|----------|----------|----------|----------|----------|----------|----------|----------|----------|----------|----------|----------|----------|----------|----------|----------|----------|----------|----------|----------|----------|----------|----------|----------|----------|----------|----------|----------|----------|----------|----------|----------|----------|----------|----------|----------|----------|----------|----------|----------|----------|----------|----------|----------|----------|----------|----------|----------|----------|----------|----------|----------|----------|----------|----------|----------|----------|----------|----------|----------|----------|----------|----------|----------|----------|----------|----------|----------|----------|----------|----------|----------|----------|----------|----------|----------|----------|----------|----------|----------|----------|----------|----------|----------|----------|----------|----------|----------|----------|----------|----------|----------|----------|----------|----------|----------|----------|----------|----------|----------|----------|----------|----------|----------|----------|----------|----------|----------|----------|----------|----------|----------|----------|----------|----------|----------|----------|----------|----------|----------|----------|----------|----------|----------|----------|----------|----------|----------|----------|----------|----------|----------|----------|----------|----------|----------|----------|----------|----------|----------|----------|----------|----------|----------|----------|----------|----------|----------|----------|----------|----------|----------|----------|----------|----------|----------|----------|----------|----------|----------|----------|----------|----------|----------|----------|----------|----------|----------|----------|----------|----------|----------|----------|----------|----------|----------|----------|----------|----------|----------|----------|----------|----------|----------|----------|----------|----------|----------|----------|----------|----------|----------|----------|----------|----------|----------|----------|----------|----------|----------|----------|----------|----------|----------|----------|----------|----------|----------|----------|----------|----------|----------|----------|----------|----------|----------|----------|----------|----------|----------|----------|----------|----------|----------|----------|----------|----------|----------|----------|----------|----------|----------|
| Q8NI36 | Q8NI36 | WD repeat-containing protein 36 | WDR36 | 5 |  | 5 |  | 5 | By MS/MS |
|--------|--------|---------------------------------|-------|---|--|---|--|---|----------|----------|----------|----------|----------|----------|----------|----------|----------|----------|----------|----------|----------|----------|----------|----------|----------|----------|----------|----------|----------|----------|----------|----------|----------|----------|----------|----------|----------|----------|----------|----------|----------|----------|----------|----------|----------|----------|----------|----------|----------|----------|----------|----------|----------|----------|----------|----------|----------|----------|----------|----------|----------|----------|----------|----------|----------|----------|----------|----------|----------|----------|----------|----------|----------|----------|----------|----------|----------|----------|----------|----------|----------|----------|----------|----------|----------|----------|----------|----------|----------|----------|----------|----------|----------|----------|----------|----------|----------|----------|----------|----------|----------|----------|----------|----------|----------|----------|----------|----------|----------|----------|----------|----------|----------|----------|----------|----------|----------|----------|----------|----------|----------|----------|----------|----------|----------|----------|----------|----------|----------|----------|----------|----------|----------|----------|----------|----------|----------|----------|----------|----------|----------|----------|----------|----------|----------|----------|----------|----------|----------|----------|----------|----------|----------|----------|----------|----------|----------|----------|----------|----------|----------|----------|----------|----------|----------|----------|----------|----------|----------|----------|----------|----------|----------|----------|----------|----------|----------|----------|----------|----------|----------|----------|----------|----------|----------|----------|----------|----------|----------|----------|----------|----------|----------|----------|----------|----------|----------|----------|----------|----------|----------|----------|----------|----------|----------|----------|----------|----------|----------|----------|----------|----------|----------|----------|----------|----------|----------|----------|----------|----------|----------|----------|----------|----------|----------|----------|----------|----------|----------|----------|----------|----------|----------|----------|----------|----------|----------|----------|----------|----------|----------|----------|----------|----------|----------|----------|----------|----------|----------|----------|----------|----------|----------|----------|----------|----------|----------|----------|----------|----------|----------|----------|----------|----------|----------|----------|----------|----------|----------|----------|----------|----------|----------|----------|----------|----------|----------|----------|----------|----------|----------|----------|----------|----------|----------|----------|----------|----------|----------|----------|----------|----------|----------|----------|----------|----------|----------|----------|----------|----------|----------|----------|----------|----------|----------|----------|----------|----------|----------|----------|----------|----------|----------|----------|----------|----------|----------|----------|----------|----------|----------|----------|----------|----------|----------|----------|----------|----------|----------|----------|----------|----------|----------|----------|----------|----------|----------|----------|----------|----------|----------|----------|----------|----------|----------|----------|----------|----------|----------|----------|----------|----------|----------|----------|----------|----------|----------|----------|----------|----------|----------|----------|----------|----------|----------|----------|----------|----------|----------|----------|----------|----------|----------|----------|----------|----------|----------|----------|----------|----------|----------|----------|----------|----------|----------|----------|----------|----------|----------|----------|----------|----------|----------|----------|----------|----------|----------|----------|----------|----------|----------|----------|----------|----------|----------|----------|----------|----------|----------|----------|----------|----------|----------|----------|----------|----------|----------|----------|----------|----------|----------|----------|----------|----------|----------|----------|----------|----------|----------|----------|----------|----------|----------|----------|----------|----------|----------|----------|----------|----------|----------|----------|----------|----------|----------|----------|----------|----------|----------|----------|----------|----------|----------|----------|----------|----------|----------|----------|----------|----------|----------|----------|----------|----------|----------|----------|----------|----------|----------|----------|----------|----------|----------|----------|----------|----------|----------|----------|----------|----------|----------|----------|----------|----------|----------|----------|----------|----------|----------|----------|----------|----------|----------|----------|----------|----------|----------|----------|----------|----------|----------|----------|----------|----------|----------|----------|----------|----------|----------|----------|----------|----------|----------|----------|----------|----------|----------|----------|----------|----------|----------|----------|----------|----------|----------|----------|----------|----------|----------|----------|----------|----------|----------|----------|----------|----------|----------|----------|----------|----------|----------|----------|----------|----------|----------|----------|----------|----------|----------|----------|----------|----------|----------|----------|----------|----------|----------|----------|----------|----------|----------|----------|----------|----------|----------|----------|----------|----------|----------|----------|----------|----------|----------|----------|----------|----------|----------|----------|----------|----------|----------|----------|----------|----------|----------|----------|----------|----------|----------|----------|----------|----------|----------|----------|----------|----------|----------|----------|----------|----------|----------|----------|----------|----------|----------|----------|----------|----------|----------|----------|----------|----------|----------|----------|----------|----------|----------|----------|----------|----------|----------|----------|----------|----------|----------|----------|----------|----------|----------|----------|----------|----------|----------|----------|----------|----------|----------|----------|----------|----------|----------|----------|----------|----------|----------|----------|----------|----------|----------|----------|----------|----------|----------|----------|----------|----------|----------|----------|----------|----------|----------|----------|----------|----------|----------|----------|----------|----------|----------|----------|----------|----------|----------|----------|----------|----------|----------|----------|----------|----------|----------|----------|----------|----------|----------|----------|----------|----------|----------|----------|----------|----------|----------|----------|----------|----------|----------|----------|----------|----------|----------|----------|----------|----------|----------|----------|----------|----------|----------|----------|----------|----------|----------|----------|----------|----------|----------|----------|----------|----------|----------|----------|----------|----------|----------|----------|----------|----------|----------|----------|----------|----------|----------|----------|----------|----------|----------|----------|----------|----------|----------|----------|

- a Herein, and for all other columns, we followed the definitions and parameters as in MaxQuant (ver. 1.6.0.16). Identifier(s) of protein(s) contained in the Protein Group created by the built-in Andromeda searching
- b When the same peptide sequences is assigned to diverse proteins in the reference database, here only the ID of proteins with a more confident identification is reported for sake of clarity
- c Total number of peptide sequences associated with all proteins in the group. With the sequence coverage, can be used to qualitatively estimate the level of confidence in protein(s) identification(s). In this study, we accepted from the original data set only identifications achieved with at least 4 peptides
- d Sum of the number of peptide sequences exclusively assigned to the protein group (unique peptides), and that of the peptide sequences shared with other protein groups ("razor peptides"). This parameter is used in quantitative analysis
- e Total number of peptide sequences exclusively assigned to the protein group. With the sequence coverage, can be used to qualitatively estimate the level of confidence in protein(s) identification(s). In this study, we accepted from the original data set only identification achieved with at least 2 unique peptide.
- f Indicates whether the peptide sequence assignment was obtained by analysis of daughter ions (by MS/MS) or only by matching the mass of a parent ion between runs (blank column). Data are reported for each experiment: FRW is for "forward" and REV is for "reverse" experiments; numers refers to the biological replicates, whereas letters to the technical replicates.
- g Sequence coverage of the best protein sequence contained in the group by the identified peptides, expressed as %.
- h Molecular weight of the leading protein sequence contained in the protein group.
- i In the MaxQuant algorithms, Q-values of a protein group are the name given to the adjusted p-values found using an optimised FDR approach. It ranges between 0 and 1, with higher values referring for an high probability to be an fault positive hit.
- l Score for the protein identification, determined by multiplying each peptide posterior error probabilities (PEPs) calculated by the Andromeda search engine for assigning statistical significance to the peptide identifications. The larger this score, the more certain is the identification of a protein.
